# Supplementary material for: Genome-wide Identification and Expression Analysis of the Eyloglucan Endotransglucosylase/hydrolase Gene Family in Poplar
Source: Research Square preprint supplement (doi:10.21203/rs.3.rs-612109/v1), 2021-06-21
Supplement: Supplementary file 1 [file cb323e634f51b84af34bad80.xlsx]

## Sheet: Sheet1
Potri.001G071000.1	3-AF1 binding site	TAAGAGAGGAA	1162	10	-	Solanum tuberosum	light responsive element
Potri.001G071000.1	TGACG-motif	TGACG	1230	5	+	Hordeum vulgare	MeJA-responsiveness
Potri.001G071000.1	TGACG-motif	TGACG	1262	5	-	Hordeum vulgare	MeJA-responsiveness
Potri.001G071000.1	AE-box	AGAAACAA	58	8	-	Arabidopsis thaliana	light responsive element
Potri.001G071000.1	MRE	AACCTAA	552	7	+	Petroselinum crispum	light responsive element
Potri.001G071000.1	AuxRR-core	GGTCCAT	15	7	-	Nicotiana tabacum	auxin responsiveness
Potri.001G071000.1	CGTCA-motif	CGTCA	1230	5	-	Hordeum vulgare	MeJA-responsiveness
Potri.001G071000.1	CGTCA-motif	CGTCA	1262	5	+	Hordeum vulgare	MeJA-responsiveness
Potri.001G071000.1	I-box	AGATAAGG	1144	8	+	Triticum aestivum	light responsive element
Potri.001G071000.1	P-box	CCTTTTG	42	7	+	Oryza sativa	gibberellin-responsive element
Potri.001G071000.1	P-box	CCTTTTG	440	7	-	Oryza sativa	gibberellin-responsive element
Potri.001G071000.1	P-box	CCTTTTG	1123	7	-	Oryza sativa	gibberellin-responsive element
Potri.001G071000.1	GT1-motif	GGTTAA	531	6	+	Arabidopsis thaliana	light responsive element
Potri.001G071000.1	ARE	AAACCA	289	6	+	Zea mays	anaerobic induction
Potri.001G071000.1	ARE	AAACCA	1353	6	+	Zea mays	anaerobic induction
Potri.001G071000.1	ARE	AAACCA	1792	6	+	Zea mays	anaerobic induction
Potri.001G071000.1	TCT-motif	TCTTAC	463	6	-	Arabidopsis thaliana	light responsive element
Potri.001G071000.1	TCT-motif	TCTTAC	975	6	-	Arabidopsis thaliana	light responsive element
Potri.001G071000.1	MBS	CAACTG	352	6	-	Arabidopsis thaliana	drought-inducibility
Potri.001G071000.1	GC-motif	CCCCCG	128	6	-	Zea mays	anoxic specific inducibility
Potri.001G071000.1	GC-motif	CCCCCG	1752	6	+	Zea mays	anoxic specific inducibility
Potri.001G071000.1	G-Box	CACGTT	100	6	+	Pisum sativum	light responsive element
Potri.001G071000.1	circadian	CAAAGATATC	1391	9	-	Lycopersicon esculentum	circadian control
Potri.001G071000.1	WUN-motif	AAATTTCCT	1431	9	-	Brassica oleracea	wound-responsive element
Potri.001G071000.1	TGA-element	AACGAC	176	6	+	Brassica oleracea	auxin responsiveness
Potri.001G071000.1	ABRE	ACGTG	100	5	-	Arabidopsis thaliana	abscisic acid responsiveness
Potri.001G136100.1	GA-motif	ATAGATAA	756	8	+	Arabidopsis thaliana	light responsive element
Potri.001G136100.1	GA-motif	ATAGATAA	1510	8	-	Arabidopsis thaliana	light responsive element
Potri.001G136100.1	TGACG-motif	TGACG	1777	5	-	Hordeum vulgare	MeJA-responsiveness
Potri.001G136100.1	AE-box	AGAAACTT	782	8	+	Arabidopsis thaliana	light responsive element
Potri.001G136100.1	MRE	AACCTAA	1212	7	+	Petroselinum crispum	light responsive element
Potri.001G136100.1	MRE	AACCTAA	1640	7	-	Petroselinum crispum	light responsive element
Potri.001G136100.1	CGTCA-motif	CGTCA	1777	5	+	Hordeum vulgare	MeJA-responsiveness
Potri.001G136100.1	P-box	CCTTTTG	1281	7	-	Oryza sativa	gibberellin-responsive element
Potri.001G136100.1	Box 4	ATTAAT	125	6	+	Petroselinum crispum	light responsive element
Potri.001G136100.1	Box 4	ATTAAT	739	6	+	Petroselinum crispum	light responsive element
Potri.001G136100.1	Box 4	ATTAAT	894	6	+	Petroselinum crispum	light responsive element
Potri.001G136100.1	Box 4	ATTAAT	1064	6	-	Petroselinum crispum	light responsive element
Potri.001G136100.1	Box 4	ATTAAT	1681	6	-	Petroselinum crispum	light responsive element
Potri.001G136100.1	TCT-motif	TCTTAC	206	6	-	Arabidopsis thaliana	light responsive element
Potri.001G136100.1	ARE	AAACCA	140	6	-	Zea mays	anaerobic induction
Potri.001G136100.1	ARE	AAACCA	429	6	+	Zea mays	anaerobic induction
Potri.001G136100.1	ARE	AAACCA	911	6	-	Zea mays	anaerobic induction
Potri.001G136100.1	GT1-motif	GGTTAA	1377	6	+	Arabidopsis thaliana	light responsive element
Potri.001G136100.1	CAT-box	GCCACT	1766	6	-	Arabidopsis thaliana	meristem expression
Potri.001G136100.1	LAMP-element	CTTTATCA	1095	8	-	Pisum sativum	light responsive element
Potri.001G136100.1	MBS	CAACTG	1650	6	+	Arabidopsis thaliana	drought-inducibility
Potri.001G136100.1	G-Box	CACGTT	298	6	-	Pisum sativum	light responsive element
Potri.001G136100.1	GATA-motif	AAGGATAAGG	167	9	+	Solanum tuberosum	light responsive element
Potri.001G136100.1	GATA-motif	GATAGGA	412	7	-	Arabidopsis thaliana	light responsive element
Potri.001G136100.1	GATA-motif	GATAGGG	1883	7	-	Pisum sativum	light responsive element
Potri.001G136100.1	GATA-motif	AAGGATAAGG	1890	9	-	Solanum tuberosum	light responsive element
Potri.001G136100.1	TGA-element	AACGAC	68	6	+	Brassica oleracea	auxin responsiveness
Potri.001G136100.1	TGA-element	AACGAC	273	6	+	Brassica oleracea	auxin responsiveness
Potri.001G136100.1	TGA-element	AACGAC	1827	6	+	Brassica oleracea	auxin responsiveness
Potri.001G136100.1	TCCC-motif	TCTCCCT	1880	7	+	Spinacia oleracea	light responsive element
Potri.001G136100.1	ABRE	ACGTG	299	5	+	Arabidopsis thaliana	abscisic acid responsiveness
Potri.002G060400.1	RY-element	CATGCATG	115	8	+	Helianthus annuus	seed-specific regulation
Potri.002G060400.1	LTR	CCGAAA	206	6	-	Hordeum vulgare	low-temperature responsiveness
Potri.002G060400.1	Box 4	ATTAAT	198	6	+	Petroselinum crispum	light responsive element
Potri.002G060400.1	Box 4	ATTAAT	225	6	+	Petroselinum crispum	light responsive element
Potri.002G060400.1	Box 4	ATTAAT	233	6	+	Petroselinum crispum	light responsive element
Potri.002G060400.1	Box 4	ATTAAT	442	6	+	Petroselinum crispum	light responsive element
Potri.002G060400.1	Box 4	ATTAAT	811	6	+	Petroselinum crispum	light responsive element
Potri.002G060400.1	Box 4	ATTAAT	999	6	-	Petroselinum crispum	light responsive element
Potri.002G060400.1	Box 4	ATTAAT	1081	6	-	Petroselinum crispum	light responsive element
Potri.002G060400.1	Box 4	ATTAAT	1111	6	-	Petroselinum crispum	light responsive element
Potri.002G060400.1	Box 4	ATTAAT	1134	6	-	Petroselinum crispum	light responsive element
Potri.002G060400.1	Box 4	ATTAAT	1796	6	-	Petroselinum crispum	light responsive element
Potri.002G060400.1	P-box	CCTTTTG	1743	7	-	Oryza sativa	gibberellin-responsive element
Potri.002G060400.1	P-box	CCTTTTG	1890	7	-	Oryza sativa	gibberellin-responsive element
Potri.002G060400.1	I-box	AGATAAGG	1529	8	+	Triticum aestivum	light responsive element
Potri.002G060400.1	O2-site	GATGACATGG	723	9	+	Zea mays	zein metabolism regulation
Potri.002G060400.1	GATA-motif	AAGATAAGATT	892	10	-	Arabidopsis thaliana	light responsive element
Potri.002G060400.1	GATA-motif	AAGATAAGATT	973	10	+	Arabidopsis thaliana	light responsive element
Potri.002G060400.1	GATA-motif	AAGATAAGATT	1122	10	+	Arabidopsis thaliana	light responsive element
Potri.002G060400.1	GATA-motif	AAGGATAAGG	1959	9	-	Solanum tuberosum	light responsive element
Potri.002G060400.1	GATA-motif	GATAGGG	1980	7	-	Pisum sativum	light responsive element
Potri.002G060400.1	MBS	CAACTG	1623	6	+	Arabidopsis thaliana	drought-inducibility
Potri.002G060400.1	CAT-box	GCCACT	638	6	+	Arabidopsis thaliana	meristem expression
Potri.002G060400.1	TCT-motif	TCTTAC	267	6	+	Arabidopsis thaliana	light responsive element
Potri.002G060400.1	ARE	AAACCA	1330	6	+	Zea mays	anaerobic induction
Potri.002G060400.1	ARE	AAACCA	1472	6	+	Zea mays	anaerobic induction
Potri.002G060400.1	ARE	AAACCA	1538	6	+	Zea mays	anaerobic induction
Potri.002G060400.1	ARE	AAACCA	1683	6	-	Zea mays	anaerobic induction
Potri.002G060400.1	TCCC-motif	TCTCCCT	1786	7	+	Spinacia oleracea	light responsive element
Potri.002G060400.1	TCCC-motif	TCTCCCT	1977	7	+	Spinacia oleracea	light responsive element
Potri.002G060500.1	circadian	CAAAGATATC	420	9	-	Lycopersicon esculentum	circadian control
Potri.002G060500.1	ABRE	ACGTG	1511	5	-	Arabidopsis thaliana	abscisic acid responsiveness
Potri.002G060500.1	ARE	AAACCA	118	6	-	Zea mays	anaerobic induction
Potri.002G060500.1	ARE	AAACCA	201	6	-	Zea mays	anaerobic induction
Potri.002G060500.1	TCT-motif	TCTTAC	510	6	+	Arabidopsis thaliana	light responsive element
Potri.002G060500.1	GT1-motif	GGTTAAT	803	7	-	Avena sativa	light responsive element
Potri.002G060500.1	GT1-motif	GGTTAA	804	6	-	Arabidopsis thaliana	light responsive element
Potri.002G060500.1	MBS	CAACTG	326	6	-	Arabidopsis thaliana	drought-inducibility
Potri.002G060500.1	MBS	CAACTG	1493	6	-	Arabidopsis thaliana	drought-inducibility
Potri.002G060500.1	CAT-box	GCCACT	247	6	+	Arabidopsis thaliana	meristem expression
Potri.002G060500.1	CAT-box	GCCACT	1530	6	+	Arabidopsis thaliana	meristem expression
Potri.002G060500.1	G-box	CACGTC	1511	6	+	Zea mays	light responsive element
Potri.002G060500.1	AT1-motif	AATTATTTTTTATT	1169	13	+	Solanum tuberosum	light responsive element
Potri.002G060500.1	ATCT-motif	AATCTAATCC	951	9	-	Pisum sativum	light responsive element
Potri.002G060500.1	LTR	CCGAAA	1658	6	-	Hordeum vulgare	low-temperature responsiveness
Potri.002G153200.1	ABRE	GCAACGTGTC	1017	9	-	Hordeum vulgare	abscisic acid responsiveness
Potri.002G153200.1	ABRE	ACGTG	1019	5	-	Arabidopsis thaliana	abscisic acid responsiveness
Potri.002G153200.1	ABRE	CACGTG	1076	6	-	Arabidopsis thaliana	abscisic acid responsiveness
Potri.002G153200.1	ABRE	ACGTG	1077	5	+	Arabidopsis thaliana	abscisic acid responsiveness
Potri.002G153200.1	circadian	CAAAGATATC	25	9	+	Lycopersicon esculentum	circadian control
Potri.002G153200.1	G-Box	CACGTT	1019	6	+	Pisum sativum	light responsive element
Potri.002G153200.1	G-Box	CACGTG	1076	6	-	Pisum sativum	light responsive element
Potri.002G153200.1	G-box	ACACGTG(G/t)CACC	1018	10.5	+	Lycopersicon esculentum	light responsive element
Potri.002G153200.1	G-box	CACGTG	1076	6	-	Arabidopsis thaliana	light responsive element
Potri.002G153200.1	G-box	TAACACGTAG	1966	9	+	Brassica oleracea	light responsive element
Potri.002G153200.1	GATA-motif	AAGGATAAGG	776	9	+	Solanum tuberosum	light responsive element
Potri.002G153200.1	ARE	AAACCA	427	6	+	Zea mays	anaerobic induction
Potri.002G153200.1	ARE	AAACCA	733	6	+	Zea mays	anaerobic induction
Potri.002G153200.1	ARE	AAACCA	1212	6	+	Zea mays	anaerobic induction
Potri.002G153200.1	GT1-motif	GGTTAA	317	6	+	Arabidopsis thaliana	light responsive element
Potri.002G153200.1	GT1-motif	GGTTAA	1694	6	-	Arabidopsis thaliana	light responsive element
Potri.002G153200.1	GT1-motif	GGTTAA	1943	6	-	Arabidopsis thaliana	light responsive element
Potri.002G153200.1	Sp1	GGGCGG	261	6	+	Oryza sativa	light responsive element
Potri.002G153200.1	P-box	CCTTTTG	220	7	-	Oryza sativa	gibberellin-responsive element
Potri.002G153200.1	A-box	CCGTCC	1933	6	+	Petroselinum crispum	cis-acting regulatory element
Potri.002G153200.1	Box 4	ATTAAT	244	6	+	Petroselinum crispum	light responsive element
Potri.002G153200.1	Box 4	ATTAAT	1172	6	-	Petroselinum crispum	light responsive element
Potri.002G153200.1	Box 4	ATTAAT	1176	6	-	Petroselinum crispum	light responsive element
Potri.002G153200.1	Box 4	ATTAAT	1951	6	-	Petroselinum crispum	light responsive element
Potri.002G153200.1	AT1-motif	AATTATTTTTTATT	274	13	-	Solanum tuberosum	light responsive element
Potri.002G153200.1	CGTCA-motif	CGTCA	1127	5	+	Hordeum vulgare	MeJA-responsiveness
Potri.002G153200.1	TGACG-motif	TGACG	1127	5	-	Hordeum vulgare	MeJA-responsiveness
Potri.002G153200.1	AAAC-motif	CAATCAAAACCT	1848	11	+	Spinacia oleracea	light responsive element
Potri.002G236200.1	AT1-motif	AATTATTTTTTATT	1052	13	-	Solanum tuberosum	light responsive element
Potri.002G236200.1	A-box	CCGTCC	832	6	-	Petroselinum crispum	cis-acting regulatory element
Potri.002G236200.1	Box 4	ATTAAT	271	6	+	Petroselinum crispum	light responsive element
Potri.002G236200.1	Box 4	ATTAAT	509	6	+	Petroselinum crispum	light responsive element
Potri.002G236200.1	Box 4	ATTAAT	1146	6	-	Petroselinum crispum	light responsive element
Potri.002G236200.1	Box 4	ATTAAT	1463	6	-	Petroselinum crispum	light responsive element
Potri.002G236200.1	Box 4	ATTAAT	1584	6	-	Petroselinum crispum	light responsive element
Potri.002G236200.1	I-box	atGATAAGGTC	56	10	+	Helianthus annuus	light responsive element
Potri.002G236200.1	TC-rich repeats	GTTTTCTTAC	1428	9	-	Nicotiana tabacum	defense and stress responsiveness
Potri.002G236200.1	AE-box	AGAAACTT	125	8	+	Arabidopsis thaliana	light responsive element
Potri.002G236200.1	MSA-like	TCAAACGGT	711	9	+	Catharanthus roseus	cell cycle regulation
Potri.002G236200.1	ACA-motif	AATCACAACCATA	935	12	+	Arabidopsis thaliana	light responsive element
Potri.002G236200.1	ABRE	ACGTG	818	5	+	Arabidopsis thaliana	abscisic acid responsiveness
Potri.002G236200.1	ABRE	ACGTG	1250	5	+	Arabidopsis thaliana	abscisic acid responsiveness
Potri.002G236200.1	TCCC-motif	TCTCCCT	1968	7	+	Spinacia oleracea	light responsive element
Potri.002G236200.1	MBS	CAACTG	877	6	+	Arabidopsis thaliana	drought-inducibility
Potri.002G236200.1	ARE	AAACCA	1400	6	+	Zea mays	anaerobic induction
Potri.002G236200.1	GATA-motif	GATAGGG	1910	7	-	Pisum sativum	light responsive element
Potri.002G236200.1	G-box	TACGTG	817	6	+	Arabidopsis thaliana	light responsive element
Potri.002G236200.1	ACE	CTAACGTATT	1515	9	-	Petroselinum crispum	light responsive element
Potri.002G236200.1	G-Box	CACGTT	1249	6	-	Pisum sativum	light responsive element
Potri.002G244200.1	GA-motif	ATAGATAA	331	8	-	Arabidopsis thaliana	light responsive element
Potri.002G244200.1	GA-motif	ATAGATAA	863	8	-	Arabidopsis thaliana	light responsive element
Potri.002G244200.1	chs-CMA1a	TTACTTAA	1491	8	+	Daucus carota	light responsive element
Potri.002G244200.1	TCA-element	CCATCTTTTT	65	9	+	Nicotiana tabacum	light responsive element
Potri.002G244200.1	TCA-element	CCATCTTTTT	1516	9	-	Nicotiana tabacum	light responsive element
Potri.002G244200.1	Box 4	ATTAAT	1137	6	-	Petroselinum crispum	light responsive element
Potri.002G244200.1	Box 4	ATTAAT	1415	6	-	Petroselinum crispum	light responsive element
Potri.002G244200.1	Box 4	ATTAAT	1719	6	-	Petroselinum crispum	light responsive element
Potri.002G244200.1	TCT-motif	TCTTAC	1324	6	-	Arabidopsis thaliana	light responsive element
Potri.002G244200.1	GT1-motif	GGTTAA	1185	6	+	Arabidopsis thaliana	light responsive element
Potri.002G244200.1	MBS	CAACTG	674	6	-	Arabidopsis thaliana	drought-inducibility
Potri.002G244200.1	ACE	GACACGTATG	1919	9	-	Petroselinum crispum	light responsive element
Potri.002G244200.1	G-box	TACGTG	686	6	+	Arabidopsis thaliana	light responsive element
Potri.002G244200.1	G-box	TACGTG	1921	6	+	Arabidopsis thaliana	light responsive element
Potri.002G244200.1	GATA-motif	GATAGGG	1521	7	+	Pisum sativum	light responsive element
Potri.002G244200.1	ABRE	ACGTG	687	5	+	Arabidopsis thaliana	abscisic acid responsiveness
Potri.002G244200.1	ABRE	ACGTG	1922	5	+	Arabidopsis thaliana	abscisic acid responsiveness
Potri.002G244200.1	MSA-like	(T/C)C(T/C)AACGG(T/C)(T/C)A	1179	9	+	Catharanthus roseus	cell cycle regulation
Potri.003G097300.1	Box 4	ATTAAT	400	6	+	Petroselinum crispum	light responsive element
Potri.003G097300.1	Box 4	ATTAAT	1491	6	-	Petroselinum crispum	light responsive element
Potri.003G097300.1	CGTCA-motif	CGTCA	1006	5	-	Hordeum vulgare	MeJA-responsiveness
Potri.003G097300.1	AT1-motif	AATTATTTTTTATT	1410	13	-	Solanum tuberosum	light responsive element
Potri.003G097300.1	MRE	AACCTAA	1983	7	-	Petroselinum crispum	light responsive element
Potri.003G097300.1	TGACG-motif	TGACG	1006	5	+	Hordeum vulgare	MeJA-responsiveness
Potri.003G097300.1	TATC-box	TATCCCA	1747	7	+	Oryza sativa	gibberellin-responsive element
Potri.003G097300.1	GATA-motif	GATAGGA	450	7	-	Arabidopsis thaliana	light responsive element
Potri.003G097300.1	GATA-motif	GATAGGA	699	7	+	Arabidopsis thaliana	light responsive element
Potri.003G097300.1	GATA-motif	AAGGATAAGG	1878	9	-	Solanum tuberosum	light responsive element
Potri.003G097300.1	GATA-motif	AAGGATAAGG	1941	9	+	Solanum tuberosum	light responsive element
Potri.003G097300.1	G-box	CTTCCACGTGGCA	1226	12	-	Arabidopsis thaliana	light responsive element
Potri.003G097300.1	G-box	GCCACGTGGA	1227	9	+	Arabidopsis thaliana	light responsive element
Potri.003G097300.1	G-Box	TCCACATGGCA	1226	11	-	Triticum aestivum	light responsive element
Potri.003G097300.1	CAT-box	GCCACT	1159	6	+	Arabidopsis thaliana	meristem expression
Potri.003G097300.1	ARE	AAACCA	374	6	-	Zea mays	anaerobic induction
Potri.003G097300.1	ARE	AAACCA	951	6	+	Zea mays	anaerobic induction
Potri.003G097300.1	ARE	AAACCA	1685	6	+	Zea mays	anaerobic induction
Potri.003G097300.1	GT1-motif	GGTTAA	1839	6	-	Arabidopsis thaliana	light responsive element
Potri.003G097300.1	GT1-motif	GGTTAA	1986	6	+	Arabidopsis thaliana	light responsive element
Potri.003G159700.1	G-box	TACGTG	1329	6	+	Arabidopsis thaliana	light responsive element
Potri.003G159700.1	G-Box	CACGTT	1477	6	-	Pisum sativum	light responsive element
Potri.003G159700.1	MBS	CAACTG	251	6	+	Arabidopsis thaliana	drought-inducibility
Potri.003G159700.1	CAT-box	GCCACT	1247	6	-	Arabidopsis thaliana	meristem expression
Potri.003G159700.1	ARE	AAACCA	607	6	+	Zea mays	anaerobic induction
Potri.003G159700.1	ARE	AAACCA	1737	6	-	Zea mays	anaerobic induction
Potri.003G159700.1	GT1-motif	GGTTAA	258	6	+	Arabidopsis thaliana	light responsive element
Potri.003G159700.1	GT1-motif	GGTTAA	260	6	-	Arabidopsis thaliana	light responsive element
Potri.003G159700.1	GT1-motif	GGTTAA	1280	6	+	Arabidopsis thaliana	light responsive element
Potri.003G159700.1	GT1-motif	GGTTAAT	1363	7	-	Avena sativa	light responsive element
Potri.003G159700.1	GT1-motif	GGTTAA	1364	6	-	Arabidopsis thaliana	light responsive element
Potri.003G159700.1	ABRE	AACCCGG	476	7	+	Arabidopsis thaliana	abscisic acid responsiveness
Potri.003G159700.1	ABRE	TACGTGTC	1329	8	+	Oryza sativa	abscisic acid responsiveness
Potri.003G159700.1	ABRE	ACGTG	1330	5	+	Arabidopsis thaliana	abscisic acid responsiveness
Potri.003G159700.1	ABRE	ACGTG	1478	5	+	Arabidopsis thaliana	abscisic acid responsiveness
Potri.003G159700.1	circadian	CAAAGATATC	1082	9	+	Lycopersicon esculentum	circadian control
Potri.003G159700.1	TGACG-motif	TGACG	1949	5	+	Hordeum vulgare	MeJA-responsiveness
Potri.003G159700.1	LTR	CCGAAA	923	6	-	Hordeum vulgare	low-temperature responsiveness
Potri.003G159700.1	Box 4	ATTAAT	483	6	+	Petroselinum crispum	light responsive element
Potri.003G159700.1	Box 4	ATTAAT	777	6	+	Petroselinum crispum	light responsive element
Potri.003G159700.1	Box 4	ATTAAT	1587	6	-	Petroselinum crispum	light responsive element
Potri.003G159700.1	Box 4	ATTAAT	1622	6	-	Petroselinum crispum	light responsive element
Potri.003G159700.1	Box 4	ATTAAT	1643	6	-	Petroselinum crispum	light responsive element
Potri.003G159700.1	Box 4	ATTAAT	1680	6	-	Petroselinum crispum	light responsive element
Potri.003G159700.1	CGTCA-motif	CGTCA	1949	5	-	Hordeum vulgare	MeJA-responsiveness
Potri.003G159700.1	Gap-box	CAAATGAA(A/G)A	1751	9.5	+	Arabidopsis thaliana	light responsive element
Potri.003G159700.1	AT1-motif	AATTATTTTTTATT	636	13	-	Solanum tuberosum	light responsive element
Potri.003G159700.1	O2-site	GTTGACGTGA	469	9	-	Zea mays	zein metabolism regulation
Potri.004G021000.1	ARE	AAACCA	1843	6	-	Zea mays	anaerobic induction
Potri.004G021000.1	GT1-motif	GGTTAA	247	6	+	Arabidopsis thaliana	light responsive element
Potri.004G021000.1	GT1-motif	GGTTAA	407	6	+	Arabidopsis thaliana	light responsive element
Potri.004G021000.1	GT1-motif	GGTTAA	409	6	-	Arabidopsis thaliana	light responsive element
Potri.004G021000.1	GT1-motif	GGTTAA	1549	6	-	Arabidopsis thaliana	light responsive element
Potri.004G021000.1	CAT-box	GCCACT	1253	6	+	Arabidopsis thaliana	meristem expression
Potri.004G021000.1	MBS	CAACTG	1070	6	-	Arabidopsis thaliana	drought-inducibility
Potri.004G021000.1	ACE	CTAACGTATT	920	9	-	Petroselinum crispum	light responsive element
Potri.004G021000.1	G-box	CCACGTAA	1674	8	+	Brassica napus	light responsive element
Potri.004G021000.1	G-box	TACGTG	1675	6	-	Arabidopsis thaliana	light responsive element
Potri.004G021000.1	ABRE	ACGTG	1675	5	-	Arabidopsis thaliana	abscisic acid responsiveness
Potri.004G021000.1	LS7	CAGATTTATTTTTA	120	13	+	Zea mays	light responsive element
Potri.004G021000.1	ATCT-motif	AATCTAATCC	1699	9	-	Pisum sativum	light responsive element
Potri.004G021000.1	MRE	AACCTAA	1551	7	+	Petroselinum crispum	light responsive element
Potri.004G021000.1	MRE	AACCTAA	1702	7	-	Petroselinum crispum	light responsive element
Potri.004G021000.1	AuxRR-core	GGTCCAT	1132	7	-	Nicotiana tabacum	auxin responsiveness
Potri.004G021000.1	P-box	CCTTTTG	1033	7	+	Oryza sativa	gibberellin-responsive element
Potri.004G021000.1	Box 4	ATTAAT	63	6	+	Petroselinum crispum	light responsive element
Potri.004G021000.1	Box 4	ATTAAT	263	6	+	Petroselinum crispum	light responsive element
Potri.004G021000.1	Box 4	ATTAAT	936	6	+	Petroselinum crispum	light responsive element
Potri.004G021000.1	Box 4	ATTAAT	1538	6	-	Petroselinum crispum	light responsive element
Potri.004G021000.1	Box 4	ATTAAT	1668	6	-	Petroselinum crispum	light responsive element
Potri.004G021000.1	Box 4	ATTAAT	1726	6	-	Petroselinum crispum	light responsive element
Potri.005G007200.1	TCCC-motif	TCTCCCT	439	7	+	Spinacia oleracea	light responsive element
Potri.005G007200.1	MBS	CAACTG	1767	6	+	Arabidopsis thaliana	drought-inducibility
Potri.005G007200.1	GT1-motif	GGTTAA	1179	6	-	Arabidopsis thaliana	light responsive element
Potri.005G007200.1	TCT-motif	TCTTAC	1133	6	-	Arabidopsis thaliana	light responsive element
Potri.005G007200.1	TCT-motif	TCTTAC	1579	6	-	Arabidopsis thaliana	light responsive element
Potri.005G007200.1	ARE	AAACCA	872	6	+	Zea mays	anaerobic induction
Potri.005G007200.1	ARE	AAACCA	970	6	+	Zea mays	anaerobic induction
Potri.005G007200.1	ARE	AAACCA	1270	6	+	Zea mays	anaerobic induction
Potri.005G007200.1	ARE	AAACCA	1644	6	+	Zea mays	anaerobic induction
Potri.005G007200.1	ARE	AAACCA	1654	6	+	Zea mays	anaerobic induction
Potri.005G007200.1	TCA-element	CCATCTTTTT	207	9	+	Nicotiana tabacum	light responsive element
Potri.005G007200.1	TCA-element	CCATCTTTTT	1671	9	+	Nicotiana tabacum	light responsive element
Potri.005G007200.1	Box 4	ATTAAT	31	6	+	Petroselinum crispum	light responsive element
Potri.005G007200.1	Box 4	ATTAAT	236	6	+	Petroselinum crispum	light responsive element
Potri.005G007200.1	Box 4	ATTAAT	532	6	+	Petroselinum crispum	light responsive element
Potri.005G007200.1	Box 4	ATTAAT	536	6	+	Petroselinum crispum	light responsive element
Potri.005G007200.1	Box 4	ATTAAT	940	6	+	Petroselinum crispum	light responsive element
Potri.005G007200.1	Box 4	ATTAAT	1663	6	-	Petroselinum crispum	light responsive element
Potri.005G007200.1	TC-rich repeats	GTTTTCTTAC	1579	9	-	Nicotiana tabacum	defense and stress responsiveness
Potri.005G007200.1	GA-motif	ATAGATAA	916	8	-	Arabidopsis thaliana	light responsive element
Potri.005G201200.1	G-Box	CACGTT	1031	6	+	Pisum sativum	light responsive element
Potri.005G201200.1	G-box	CACGTC	337	6	-	Zea mays	light responsive element
Potri.005G201200.1	G-box	CACGTC	1552	6	+	Zea mays	light responsive element
Potri.005G201200.1	GATA-motif	AAGATAAGATT	811	10	-	Arabidopsis thaliana	light responsive element
Potri.005G201200.1	GT1-motif	GGTTAA	837	6	+	Arabidopsis thaliana	light responsive element
Potri.005G201200.1	GT1-motif	GGTTAA	1345	6	-	Arabidopsis thaliana	light responsive element
Potri.005G201200.1	ARE	AAACCA	1584	6	+	Zea mays	anaerobic induction
Potri.005G201200.1	CAT-box	GCCACT	1571	6	+	Arabidopsis thaliana	meristem expression
Potri.005G201200.1	MBS	CAACTG	19	6	-	Arabidopsis thaliana	drought-inducibility
Potri.005G201200.1	MBS	CAACTG	1617	6	-	Arabidopsis thaliana	drought-inducibility
Potri.005G201200.1	ABRE	ACGTG	338	5	+	Arabidopsis thaliana	abscisic acid responsiveness
Potri.005G201200.1	ABRE	ACGTG	1031	5	-	Arabidopsis thaliana	abscisic acid responsiveness
Potri.005G201200.1	ABRE	ACGTG	1552	5	-	Arabidopsis thaliana	abscisic acid responsiveness
Potri.005G201200.1	MRE	AACCTAA	242	7	-	Petroselinum crispum	light responsive element
Potri.005G201200.1	ATCT-motif	AATCTAATCC	521	9	+	Pisum sativum	light responsive element
Potri.005G201200.1	TGACG-motif	TGACG	81	5	+	Hordeum vulgare	MeJA-responsiveness
Potri.005G201200.1	P-box	CCTTTTG	625	7	-	Oryza sativa	gibberellin-responsive element
Potri.005G201200.1	I-box	atGATAAGGTC	441	10	+	Helianthus annuus	light responsive element
Potri.005G201200.1	I-box	AGATAAGG	1980	8	-	Triticum aestivum	light responsive element
Potri.005G201200.1	Box 4	ATTAAT	417	6	+	Petroselinum crispum	light responsive element
Potri.005G201200.1	chs-CMA2a	TCACTTGA	1527	8	-	Petroselinum crispum	light responsive element
Potri.005G201200.1	CGTCA-motif	CGTCA	81	5	-	Hordeum vulgare	MeJA-responsiveness
Potri.006G071200.1	ABRE	ACGTG	695	5	-	Arabidopsis thaliana	abscisic acid responsiveness
Potri.006G071200.1	ABRE	ACGTG	1014	5	-	Arabidopsis thaliana	abscisic acid responsiveness
Potri.006G071200.1	TCCC-motif	TCTCCCT	918	7	-	Spinacia oleracea	light responsive element
Potri.006G071200.1	HD-Zip 1	CAAT(A/T)ATTG	624	8.5	+	Arabidopsis thaliana	element involved in differentiation of the palisade mesophyll cells
Potri.006G071200.1	GT1-motif	GGTTAA	218	6	+	Arabidopsis thaliana	light responsive element
Potri.006G071200.1	GT1-motif	GGTTAA	220	6	-	Arabidopsis thaliana	light responsive element
Potri.006G071200.1	GT1-motif	GGTTAAT	1008	7	-	Avena sativa	light responsive element
Potri.006G071200.1	GT1-motif	GGTTAA	1009	6	-	Arabidopsis thaliana	light responsive element
Potri.006G071200.1	GT1-motif	GGTTAAT	1284	7	+	Avena sativa	light responsive element
Potri.006G071200.1	TCT-motif	TCTTAC	451	6	+	Arabidopsis thaliana	light responsive element
Potri.006G071200.1	Sp1	GGGCGG	1083	6	-	Oryza sativa	light responsive element
Potri.006G071200.1	MBS	CAACTG	1268	6	-	Arabidopsis thaliana	drought-inducibility
Potri.006G071200.1	G-box	CACGTC	695	6	+	Zea mays	light responsive element
Potri.006G071200.1	G-box	CACGTC	1014	6	+	Zea mays	light responsive element
Potri.006G071200.1	O2-site	GATGATGTGG	694	9	-	Zea mays	zein metabolism regulation
Potri.006G071200.1	CGTCA-motif	CGTCA	208	5	+	Hordeum vulgare	MeJA-responsiveness
Potri.006G071200.1	CGTCA-motif	CGTCA	697	5	+	Hordeum vulgare	MeJA-responsiveness
Potri.006G071200.1	CGTCA-motif	CGTCA	1759	5	+	Hordeum vulgare	MeJA-responsiveness
Potri.006G071200.1	AT1-motif	AATTATTTTTTATT	676	13	+	Solanum tuberosum	light responsive element
Potri.006G071200.1	AT1-motif	AATTATTTTTTATT	961	13	-	Solanum tuberosum	light responsive element
Potri.006G071200.1	Box 4	ATTAAT	164	6	+	Petroselinum crispum	light responsive element
Potri.006G071200.1	Box 4	ATTAAT	503	6	+	Petroselinum crispum	light responsive element
Potri.006G071200.1	Box 4	ATTAAT	943	6	+	Petroselinum crispum	light responsive element
Potri.006G071200.1	Box 4	ATTAAT	996	6	+	Petroselinum crispum	light responsive element
Potri.006G071200.1	Box 4	ATTAAT	1459	6	-	Petroselinum crispum	light responsive element
Potri.006G071200.1	Box 4	ATTAAT	1745	6	-	Petroselinum crispum	light responsive element
Potri.006G071200.1	ATCT-motif	AATCTAATCC	1398	9	+	Pisum sativum	light responsive element
Potri.006G071200.1	TGACG-motif	TGACG	208	5	-	Hordeum vulgare	MeJA-responsiveness
Potri.006G071200.1	TGACG-motif	TGACG	697	5	-	Hordeum vulgare	MeJA-responsiveness
Potri.006G071200.1	TGACG-motif	TGACG	1759	5	-	Hordeum vulgare	MeJA-responsiveness
Potri.006G071200.1	LTR	CCGAAA	1805	6	-	Hordeum vulgare	low-temperature responsiveness
Potri.006G122900.1	G-Box	CACGTT	165	6	+	Pisum sativum	light responsive element
Potri.006G122900.1	GATA-motif	GATAGGG	1333	7	-	Pisum sativum	light responsive element
Potri.006G122900.1	TCT-motif	TCTTAC	902	6	-	Arabidopsis thaliana	light responsive element
Potri.006G122900.1	TCT-motif	TCTTAC	1644	6	+	Arabidopsis thaliana	light responsive element
Potri.006G122900.1	ARE	AAACCA	1652	6	-	Zea mays	anaerobic induction
Potri.006G122900.1	ARE	AAACCA	1767	6	+	Zea mays	anaerobic induction
Potri.006G122900.1	GT1-motif	GGTTAA	38	6	+	Arabidopsis thaliana	light responsive element
Potri.006G122900.1	GT1-motif	GGTTAAT	140	7	-	Avena sativa	light responsive element
Potri.006G122900.1	GT1-motif	GGTTAA	141	6	-	Arabidopsis thaliana	light responsive element
Potri.006G122900.1	GT1-motif	GGTTAA	159	6	+	Arabidopsis thaliana	light responsive element
Potri.006G122900.1	GT1-motif	GGTTAA	682	6	+	Arabidopsis thaliana	light responsive element
Potri.006G122900.1	MBS	CAACTG	675	6	-	Arabidopsis thaliana	drought-inducibility
Potri.006G122900.1	MBS	CAACTG	1722	6	+	Arabidopsis thaliana	drought-inducibility
Potri.006G122900.1	MBS	CAACTG	1890	6	+	Arabidopsis thaliana	drought-inducibility
Potri.006G122900.1	ABRE	ACGTG	165	5	-	Arabidopsis thaliana	abscisic acid responsiveness
Potri.006G122900.1	TC-rich repeats	GTTTTCTTAC	1448	9	-	Nicotiana tabacum	defense and stress responsiveness
Potri.006G122900.1	ATCT-motif	AATCTAATCC	15	9	+	Pisum sativum	light responsive element
Potri.006G122900.1	ATCT-motif	AATCTAATCC	1437	9	-	Pisum sativum	light responsive element
Potri.006G122900.1	TGACG-motif	TGACG	1565	5	-	Hordeum vulgare	MeJA-responsiveness
Potri.006G122900.1	TCA-element	CCATCTTTTT	1102	9	-	Nicotiana tabacum	light responsive element
Potri.006G122900.1	Box 4	ATTAAT	57	6	+	Petroselinum crispum	light responsive element
Potri.006G122900.1	CGTCA-motif	CGTCA	1565	5	+	Hordeum vulgare	MeJA-responsiveness
Potri.006G160700.1	TGA-element	AACGAC	661	6	+	Brassica oleracea	auxin responsiveness
Potri.006G160700.1	GTGGC-motif	GATTCTGTGGC	646	10	+	Spinacia oleracea	light responsive element
Potri.006G160700.1	CAT-box	GCCACT	851	6	-	Arabidopsis thaliana	meristem expression
Potri.006G160700.1	MBS	CAACTG	1392	6	+	Arabidopsis thaliana	drought-inducibility
Potri.006G160700.1	TCT-motif	TCTTAC	466	6	+	Arabidopsis thaliana	light responsive element
Potri.006G160700.1	TCT-motif	TCTTAC	691	6	+	Arabidopsis thaliana	light responsive element
Potri.006G160700.1	TCT-motif	TCTTAC	1422	6	-	Arabidopsis thaliana	light responsive element
Potri.006G160700.1	GT1-motif	GGTTAAT	414	7	-	Avena sativa	light responsive element
Potri.006G160700.1	GT1-motif	GGTTAA	415	6	-	Arabidopsis thaliana	light responsive element
Potri.006G160700.1	ACE	CTAACGTATT	3	9	-	Petroselinum crispum	light responsive element
Potri.006G160700.1	CGTCA-motif	CGTCA	180	5	-	Hordeum vulgare	MeJA-responsiveness
Potri.006G160700.1	CGTCA-motif	CGTCA	575	5	-	Hordeum vulgare	MeJA-responsiveness
Potri.006G160700.1	CGTCA-motif	CGTCA	1474	5	-	Hordeum vulgare	MeJA-responsiveness
Potri.006G160700.1	Box 4	ATTAAT	53	6	+	Petroselinum crispum	light responsive element
Potri.006G160700.1	TGACG-motif	TGACG	180	5	+	Hordeum vulgare	MeJA-responsiveness
Potri.006G160700.1	TGACG-motif	TGACG	575	5	+	Hordeum vulgare	MeJA-responsiveness
Potri.006G160700.1	TGACG-motif	TGACG	1474	5	+	Hordeum vulgare	MeJA-responsiveness
Potri.006G160700.1	GARE-motif	TCTGTTG	223	7	-	Brassica oleracea	gibberellin-responsive element
Potri.006G160700.1	GARE-motif	TCTGTTG	1246	7	-	Brassica oleracea	gibberellin-responsive element
Potri.006G160700.1	TC-rich repeats	GTTTTCTTAC	462	9	+	Nicotiana tabacum	defense and stress responsiveness
Potri.006G160700.1	TC-rich repeats	GTTTTCTTAC	1422	9	-	Nicotiana tabacum	defense and stress responsiveness
Potri.006G169900.1	MRE	AACCTAA	1610	7	+	Petroselinum crispum	light responsive element
Potri.006G169900.1	GARE-motif	TCTGTTG	101	7	+	Brassica oleracea	gibberellin-responsive element
Potri.006G169900.1	LTR	CCGAAA	1705	6	+	Hordeum vulgare	low-temperature responsiveness
Potri.006G169900.1	TGACG-motif	TGACG	248	5	-	Hordeum vulgare	MeJA-responsiveness
Potri.006G169900.1	TGACG-motif	TGACG	277	5	-	Hordeum vulgare	MeJA-responsiveness
Potri.006G169900.1	TC-rich repeats	GTTTTCTTAC	1127	9	-	Nicotiana tabacum	defense and stress responsiveness
Potri.006G170000.1	CGTCA-motif	CGTCA	220	5	+	Hordeum vulgare	MeJA-responsiveness
Potri.006G170000.1	CGTCA-motif	CGTCA	249	5	+	Hordeum vulgare	MeJA-responsiveness
Potri.006G170000.1	CGTCA-motif	CGTCA	578	5	-	Hordeum vulgare	MeJA-responsiveness
Potri.006G170000.1	O2-site	GATGA(C/T)(A/G)TG(A/G)	150	8	-	Zea mays	zein metabolism regulation
Potri.006G170000.1	O2-site	GATGA(C/T)(A/G)TG(A/G)	1911	8	-	Zea mays	zein metabolism regulation
Potri.006G170000.1	MRE	AACCTAA	1610	7	+	Petroselinum crispum	light responsive element
Potri.006G170000.1	GARE-motif	TCTGTTG	73	7	+	Brassica oleracea	gibberellin-responsive element
Potri.006G170000.1	LTR	CCGAAA	1705	6	+	Hordeum vulgare	low-temperature responsiveness
Potri.006G170000.1	TGACG-motif	TGACG	220	5	-	Hordeum vulgare	MeJA-responsiveness
Potri.006G170000.1	TGACG-motif	TGACG	249	5	-	Hordeum vulgare	MeJA-responsiveness
Potri.006G170000.1	TGACG-motif	TGACG	578	5	+	Hordeum vulgare	MeJA-responsiveness
Potri.006G170000.1	TC-rich repeats	GTTTTCTTAC	1115	9	-	Nicotiana tabacum	defense and stress responsiveness
Potri.006G170100.1	ABRE	ACGTG	1750	5	+	Arabidopsis thaliana	abscisic acid responsiveness
Potri.006G170100.1	TCCC-motif	TCTCCCT	10	7	+	Spinacia oleracea	light responsive element
Potri.006G170100.1	TCCC-motif	TCTCCCT	31	7	+	Spinacia oleracea	light responsive element
Potri.006G170100.1	TCCC-motif	TCTCCCT	44	7	+	Spinacia oleracea	light responsive element
Potri.006G170100.1	TGA-element	AACGAC	1641	6	+	Brassica oleracea	auxin responsiveness
Potri.006G170100.1	G-Box	CACGTT	1749	6	-	Pisum sativum	light responsive element
Potri.006G170100.1	ACE	CTAACGTATT	1438	9	-	Petroselinum crispum	light responsive element
Potri.006G170100.1	ARE	AAACCA	1269	6	-	Zea mays	anaerobic induction
Potri.006G170100.1	TCT-motif	TCTTAC	1738	6	-	Arabidopsis thaliana	light responsive element
Potri.006G170100.1	MBS	CAACTG	1576	6	-	Arabidopsis thaliana	drought-inducibility
Potri.006G170100.1	Box 4	ATTAAT	298	6	+	Petroselinum crispum	light responsive element
Potri.006G170100.1	O2-site	GATGACATGG	1003	9	-	Zea mays	zein metabolism regulation
Potri.006G170100.1	O2-site	GATGA(C/T)(A/G)TG(A/G)	1911	8	-	Zea mays	zein metabolism regulation
Potri.006G170100.1	MRE	AACCTAA	1610	7	+	Petroselinum crispum	light responsive element
Potri.006G170100.1	LTR	CCGAAA	1705	6	+	Hordeum vulgare	low-temperature responsiveness
Potri.007G008500.1	LTR	CCGAAA	1640	6	-	Hordeum vulgare	low-temperature responsiveness
Potri.007G008500.1	TGACG-motif	TGACG	1815	5	+	Hordeum vulgare	MeJA-responsiveness
Potri.007G008500.1	chs-CMA2a	TCACTTGA	1865	8	+	Petroselinum crispum	light responsive element
Potri.007G008500.1	AT1-motif	AATTATTTTTTATT	1099	13	+	Solanum tuberosum	light responsive element
Potri.007G008500.1	CGTCA-motif	CGTCA	1815	5	-	Hordeum vulgare	MeJA-responsiveness
Potri.007G008500.1	chs-CMA1a	TTACTTAA	1093	8	+	Daucus carota	light responsive element
Potri.007G008500.1	TCA-element	CCATCTTTTT	1194	9	+	Nicotiana tabacum	light responsive element
Potri.007G008500.1	Box 4	ATTAAT	47	6	+	Petroselinum crispum	light responsive element
Potri.007G008500.1	Box 4	ATTAAT	723	6	+	Petroselinum crispum	light responsive element
Potri.007G008500.1	GT1-motif	GGTTAA	1935	6	-	Arabidopsis thaliana	light responsive element
Potri.007G008500.1	TCT-motif	TCTTAC	1895	6	+	Arabidopsis thaliana	light responsive element
Potri.007G008500.1	ATC-motif	TGCTATCCA	1213	9	+	Pisum sativum	light responsive element
Potri.007G008500.1	MBS	CAACTG	1795	6	-	Arabidopsis thaliana	drought-inducibility
Potri.007G008500.1	MBS	CAACTG	1900	6	+	Arabidopsis thaliana	drought-inducibility
Potri.007G008500.1	circadian	CAAAGATATC	1388	9	-	Lycopersicon esculentum	circadian control
Potri.007G008500.1	TGA-element	AACGAC	148	6	-	Brassica oleracea	auxin responsiveness
Potri.008G138400.1	GATA-motif	AAGGATAAGG	1787	9	-	Solanum tuberosum	light responsive element
Potri.008G138400.1	MBS	CAACTG	1147	6	+	Arabidopsis thaliana	drought-inducibility
Potri.008G138400.1	Sp1	GGGCGG	614	6	+	Oryza sativa	light responsive element
Potri.008G138400.1	GT1-motif	GGTTAA	688	6	+	Arabidopsis thaliana	light responsive element
Potri.008G138400.1	ARE	AAACCA	114	6	-	Zea mays	anaerobic induction
Potri.008G138400.1	ARE	AAACCA	1061	6	-	Zea mays	anaerobic induction
Potri.008G138400.1	TCT-motif	TCTTAC	131	6	-	Arabidopsis thaliana	light responsive element
Potri.008G138400.1	TCT-motif	TCTTAC	1339	6	-	Arabidopsis thaliana	light responsive element
Potri.008G138400.1	Box 4	ATTAAT	88	6	+	Petroselinum crispum	light responsive element
Potri.008G138400.1	Box 4	ATTAAT	268	6	+	Petroselinum crispum	light responsive element
Potri.008G138400.1	Box 4	ATTAAT	1133	6	-	Petroselinum crispum	light responsive element
Potri.008G138400.1	Box 4	ATTAAT	1226	6	-	Petroselinum crispum	light responsive element
Potri.008G138400.1	I-box	gGATAAGGTG	901	9	-	Zea mays	light responsive element
Potri.008G138400.1	I-box	gGATAAGGTG	989	9	+	Zea mays	light responsive element
Potri.008G138400.1	I-box	gGATAAGGTG	1785	9	-	Zea mays	light responsive element
Potri.008G138400.1	P-box	CCTTTTG	1306	7	-	Oryza sativa	gibberellin-responsive element
Potri.008G138400.1	CGTCA-motif	CGTCA	624	5	-	Hordeum vulgare	MeJA-responsiveness
Potri.008G138400.1	AT1-motif	AATTATTTTTTATT	261	13	-	Solanum tuberosum	light responsive element
Potri.008G138400.1	AT1-motif	AATTATTTTTTATT	458	14	+	Solanum tuberosum	light responsive element
Potri.008G138400.1	AE-box	AGAAACTT	927	8	-	Arabidopsis thaliana	light responsive element
Potri.008G138400.1	LTR	CCGAAA	25	6	+	Hordeum vulgare	low-temperature responsiveness
Potri.008G138400.1	LTR	CCGAAA	1454	6	-	Hordeum vulgare	low-temperature responsiveness
Potri.008G138400.1	TGACG-motif	TGACG	624	5	+	Hordeum vulgare	MeJA-responsiveness
Potri.008G138400.1	TC-rich repeats	GTTTTCTTAC	1339	9	-	Nicotiana tabacum	defense and stress responsiveness
Potri.009G006600.1	TGA-element	AACGAC	801	6	-	Brassica oleracea	auxin responsiveness
Potri.009G006600.1	ABRE	ACGTG	464	5	+	Arabidopsis thaliana	abscisic acid responsiveness
Potri.009G006600.1	GT1-motif	GGTTAA	1687	6	-	Arabidopsis thaliana	light responsive element
Potri.009G006600.1	TCT-motif	TCTTAC	67	6	-	Arabidopsis thaliana	light responsive element
Potri.009G006600.1	ARE	AAACCA	832	6	+	Zea mays	anaerobic induction
Potri.009G006600.1	MBS	CAACTG	428	6	-	Arabidopsis thaliana	drought-inducibility
Potri.009G006600.1	MBS	CAACTG	707	6	-	Arabidopsis thaliana	drought-inducibility
Potri.009G006600.1	MBS	CAACTG	1874	6	+	Arabidopsis thaliana	drought-inducibility
Potri.009G006600.1	G-box	TACGTG	463	6	+	Arabidopsis thaliana	light responsive element
Potri.009G006600.1	O2-site	GATGA(C/T)(A/G)TG(A/G)	1780	8	-	Zea mays	zein metabolism regulation
Potri.009G006600.1	AuxRR-core	GGTCCAT	1083	7	+	Nicotiana tabacum	auxin responsiveness
Potri.009G006600.1	CGTCA-motif	CGTCA	1811	5	+	Hordeum vulgare	MeJA-responsiveness
Potri.009G006600.1	TCA-element	CCATCTTTTT	482	9	-	Nicotiana tabacum	light responsive element
Potri.009G006600.1	TCA-element	CCATCTTTTT	1533	9	+	Nicotiana tabacum	light responsive element
Potri.009G006600.1	P-box	CCTTTTG	1313	7	-	Oryza sativa	gibberellin-responsive element
Potri.009G006600.1	Box 4	ATTAAT	5	6	+	Petroselinum crispum	light responsive element
Potri.009G006600.1	Box 4	ATTAAT	1147	6	-	Petroselinum crispum	light responsive element
Potri.009G006600.1	ATCT-motif	AATCTAATCC	22	9	+	Pisum sativum	light responsive element
Potri.009G006600.1	TGACG-motif	TGACG	1811	5	-	Hordeum vulgare	MeJA-responsiveness
Potri.009G006600.1	RY-element	CATGCATG	1650	8	-	Helianthus annuus	seed-specific regulation
Potri.009G006600.1	MRE	AACCTAA	960	7	-	Petroselinum crispum	light responsive element
Potri.009G006600.1	MRE	AACCTAA	1640	7	+	Petroselinum crispum	light responsive element
Potri.009G083800.1	LAMP-element	CTTTATCA	675	8	-	Pisum sativum	light responsive element
Potri.009G083800.1	LAMP-element	CTTTATCA	1346	8	+	Pisum sativum	light responsive element
Potri.009G083800.1	ARE	AAACCA	650	6	-	Zea mays	anaerobic induction
Potri.009G083800.1	ARE	AAACCA	1238	6	+	Zea mays	anaerobic induction
Potri.009G083800.1	TCT-motif	TCTTAC	1680	6	+	Arabidopsis thaliana	light responsive element
Potri.009G083800.1	GT1-motif	GGTTAAT	940	7	+	Avena sativa	light responsive element
Potri.009G083800.1	GATA-motif	AAGGATAAGG	459	9	-	Solanum tuberosum	light responsive element
Potri.009G083800.1	G-box	CACGAC	311	6	-	Zea mays	light responsive element
Potri.009G083800.1	TATC-box	TATCCCA	204	7	+	Oryza sativa	gibberellin-responsive element
Potri.009G083800.1	TGA-element	AACGAC	1588	6	+	Brassica oleracea	auxin responsiveness
Potri.009G083800.1	LTR	CCGAAA	1011	6	-	Hordeum vulgare	low-temperature responsiveness
Potri.009G083800.1	LTR	CCGAAA	1293	6	+	Hordeum vulgare	low-temperature responsiveness
Potri.009G083800.1	TGACG-motif	TGACG	1024	5	-	Hordeum vulgare	MeJA-responsiveness
Potri.009G083800.1	RY-element	CATGCATG	790	8	+	Helianthus annuus	seed-specific regulation
Potri.009G083800.1	CGTCA-motif	CGTCA	1024	5	+	Hordeum vulgare	MeJA-responsiveness
Potri.009G083800.1	O2-site	GATGACATGG	785	9	+	Zea mays	zein metabolism regulation
Potri.009G083800.1	A-box	CCGTCC	1501	6	-	Petroselinum crispum	cis-acting regulatory element
Potri.009G083800.1	A-box	CCGTCC	1710	6	-	Petroselinum crispum	cis-acting regulatory element
Potri.009G083800.1	Box 4	ATTAAT	422	6	+	Petroselinum crispum	light responsive element
Potri.010G102300.1	3-AF1 binding site	TAAGAGAGGAA	1840	10	-	Solanum tuberosum	light responsive element
Potri.010G102300.1	TGACG-motif	TGACG	1571	5	-	Hordeum vulgare	MeJA-responsiveness
Potri.010G102300.1	CGTCA-motif	CGTCA	1571	5	+	Hordeum vulgare	MeJA-responsiveness
Potri.010G102300.1	Gap-box	CAAATGAA(A/G)A	860	9.5	+	Arabidopsis thaliana	light responsive element
Potri.010G102300.1	Gap-box	CAAATGAA(A/G)A	1606	9.5	+	Arabidopsis thaliana	light responsive element
Potri.010G102300.1	TCA-element	CCATCTTTTT	184	9	-	Nicotiana tabacum	light responsive element
Potri.010G102300.1	A-box	CCGTCC	1646	6	-	Petroselinum crispum	cis-acting regulatory element
Potri.010G102300.1	Box 4	ATTAAT	255	6	+	Petroselinum crispum	light responsive element
Potri.010G102300.1	Box 4	ATTAAT	1096	6	-	Petroselinum crispum	light responsive element
Potri.010G102300.1	ARE	AAACCA	764	6	+	Zea mays	anaerobic induction
Potri.010G102300.1	ARE	AAACCA	796	6	+	Zea mays	anaerobic induction
Potri.010G102300.1	ARE	AAACCA	1106	6	+	Zea mays	anaerobic induction
Potri.010G102300.1	ARE	AAACCA	1301	6	-	Zea mays	anaerobic induction
Potri.010G102300.1	TCT-motif	TCTTAC	1846	6	+	Arabidopsis thaliana	light responsive element
Potri.010G102300.1	GT1-motif	GGTTAA	457	6	-	Arabidopsis thaliana	light responsive element
Potri.010G102300.1	GT1-motif	GGTTAA	467	6	-	Arabidopsis thaliana	light responsive element
Potri.010G102300.1	GT1-motif	GTGTGTGAA	1888	9	-	Solanum tuberosum	light responsive element
Potri.010G102300.1	GATA-motif	GATAGGG	137	7	+	Pisum sativum	light responsive element
Potri.010G102300.1	TCCC-motif	TCTCCCT	1701	7	+	Spinacia oleracea	light responsive element
Potri.010G102300.1	TCCC-motif	TCTCCCT	1759	7	+	Spinacia oleracea	light responsive element
Potri.011G025800.1	ARE	AAACCA	418	6	+	Zea mays	anaerobic induction
Potri.011G025800.1	ARE	AAACCA	595	6	-	Zea mays	anaerobic induction
Potri.011G025800.1	ARE	AAACCA	790	6	-	Zea mays	anaerobic induction
Potri.011G025800.1	ARE	AAACCA	855	6	+	Zea mays	anaerobic induction
Potri.011G025800.1	ARE	AAACCA	1406	6	-	Zea mays	anaerobic induction
Potri.011G025800.1	ARE	AAACCA	1501	6	+	Zea mays	anaerobic induction
Potri.011G025800.1	GT1-motif	GGTTAA	746	6	+	Arabidopsis thaliana	light responsive element
Potri.011G025800.1	GT1-motif	GGTTAAT	1086	7	-	Avena sativa	light responsive element
Potri.011G025800.1	GT1-motif	GGTTAA	1087	6	-	Arabidopsis thaliana	light responsive element
Potri.011G025800.1	GT1-motif	GGTTAA	1487	6	+	Arabidopsis thaliana	light responsive element
Potri.011G025800.1	ACE	CTAACGTATT	871	9	-	Petroselinum crispum	light responsive element
Potri.011G025800.1	GATA-motif	AAGGATAAGG	1043	9	+	Solanum tuberosum	light responsive element
Potri.011G025800.1	GATA-motif	AAGATAAGATT	1707	10	+	Arabidopsis thaliana	light responsive element
Potri.011G025800.1	MSA-like	(T/C)C(T/C)AACGG(T/C)(T/C)A	1245	8.5	+	Catharanthus roseus	cell cycle regulation
Potri.011G025800.1	GA-motif	ATAGATAA	1035	8	+	Arabidopsis thaliana	light responsive element
Potri.011G025800.1	MRE	AACCTAA	409	7	+	Petroselinum crispum	light responsive element
Potri.011G025800.1	AT1-motif	AATTATTTTTTATT	705	13	-	Solanum tuberosum	light responsive element
Potri.011G025800.1	Box 4	ATTAAT	712	6	+	Petroselinum crispum	light responsive element
Potri.011G025800.1	Box 4	ATTAAT	716	6	+	Petroselinum crispum	light responsive element
Potri.011G025800.1	Box 4	ATTAAT	720	6	+	Petroselinum crispum	light responsive element
Potri.011G025800.1	Box 4	ATTAAT	724	6	+	Petroselinum crispum	light responsive element
Potri.011G025800.1	TCA-element	CCATCTTTTT	543	9	-	Nicotiana tabacum	light responsive element
Potri.011G077300.1	ABRE	ACGTG	460	5	+	Arabidopsis thaliana	abscisic acid responsiveness
Potri.011G077300.1	ABRE	ACGTG	511	5	+	Arabidopsis thaliana	abscisic acid responsiveness
Potri.011G077300.1	ABRE	CACGTG	1381	6	-	Arabidopsis thaliana	abscisic acid responsiveness
Potri.011G077300.1	ABRE	ACGTG	1382	5	+	Arabidopsis thaliana	abscisic acid responsiveness
Potri.011G077300.1	ABRE	ACGTG	1837	5	+	Arabidopsis thaliana	abscisic acid responsiveness
Potri.011G077300.1	ABRE	ACGTG	1981	5	-	Arabidopsis thaliana	abscisic acid responsiveness
Potri.011G077300.1	GATA-motif	GATAGGA	1023	7	-	Arabidopsis thaliana	light responsive element
Potri.011G077300.1	G-Box	CACGTG	1381	6	-	Pisum sativum	light responsive element
Potri.011G077300.1	G-Box	CACGTT	1836	6	-	Pisum sativum	light responsive element
Potri.011G077300.1	G-Box	CACGTT	1981	6	+	Pisum sativum	light responsive element
Potri.011G077300.1	G-box	CACGTC	459	6	-	Zea mays	light responsive element
Potri.011G077300.1	G-box	CACGTC	510	6	-	Zea mays	light responsive element
Potri.011G077300.1	G-box	CACGTG	1381	6	-	Arabidopsis thaliana	light responsive element
Potri.011G077300.1	LAMP-element	CTTTATCA	1506	8	-	Pisum sativum	light responsive element
Potri.011G077300.1	CAT-box	GCCACT	748	6	-	Arabidopsis thaliana	meristem expression
Potri.011G077300.1	GT1-motif	GGTTAAT	1713	7	+	Avena sativa	light responsive element
Potri.011G077300.1	GT1-motif	GGTTAA	1950	6	-	Arabidopsis thaliana	light responsive element
Potri.011G077300.1	TCT-motif	TCTTAC	756	6	+	Arabidopsis thaliana	light responsive element
Potri.011G077300.1	TCT-motif	TCTTAC	1792	6	-	Arabidopsis thaliana	light responsive element
Potri.011G077300.1	ARE	AAACCA	375	6	+	Zea mays	anaerobic induction
Potri.011G077300.1	ARE	AAACCA	810	6	-	Zea mays	anaerobic induction
Potri.011G077300.1	ARE	AAACCA	1371	6	+	Zea mays	anaerobic induction
Potri.011G077300.1	TCA-element	CCATCTTTTT	1426	9	+	Nicotiana tabacum	light responsive element
Potri.011G077300.1	Box 4	ATTAAT	68	6	+	Petroselinum crispum	light responsive element
Potri.011G077300.1	Box 4	ATTAAT	1015	6	-	Petroselinum crispum	light responsive element
Potri.011G077300.1	Box 4	ATTAAT	1970	6	-	Petroselinum crispum	light responsive element
Potri.011G077300.1	CGTCA-motif	CGTCA	683	5	-	Hordeum vulgare	MeJA-responsiveness
Potri.011G077300.1	CGTCA-motif	CGTCA	698	5	-	Hordeum vulgare	MeJA-responsiveness
Potri.011G077300.1	CGTCA-motif	CGTCA	742	5	-	Hordeum vulgare	MeJA-responsiveness
Potri.011G077300.1	O2-site	GATGA(C/T)(A/G)TG(A/G)	517	8	-	Zea mays	zein metabolism regulation
Potri.011G077300.1	AE-box	AGAAACTT	353	8	-	Arabidopsis thaliana	light responsive element
Potri.011G077300.1	TGACG-motif	TGACG	683	5	+	Hordeum vulgare	MeJA-responsiveness
Potri.011G077300.1	TGACG-motif	TGACG	698	5	+	Hordeum vulgare	MeJA-responsiveness
Potri.011G077300.1	TGACG-motif	TGACG	742	5	+	Hordeum vulgare	MeJA-responsiveness
Potri.011G077400.1	GT1-motif	GTGTGTGAA	670	9	+	Solanum tuberosum	light responsive element
Potri.011G077400.1	GT1-motif	GGTTAA	1928	6	+	Arabidopsis thaliana	light responsive element
Potri.011G077400.1	ARE	AAACCA	1508	6	-	Zea mays	anaerobic induction
Potri.011G077400.1	ARE	AAACCA	1858	6	-	Zea mays	anaerobic induction
Potri.011G077400.1	TCT-motif	TCTTAC	466	6	-	Arabidopsis thaliana	light responsive element
Potri.011G077400.1	TCT-motif	TCTTAC	591	6	+	Arabidopsis thaliana	light responsive element
Potri.011G077400.1	G-box	TACGTG	72	6	+	Arabidopsis thaliana	light responsive element
Potri.011G077400.1	G-box	CACGTC	1287	6	-	Zea mays	light responsive element
Potri.011G077400.1	G-box	ACACGTGT	1338	8	-	Brassica napus	light responsive element
Potri.011G077400.1	G-box	CACGTG	1339	6	-	Arabidopsis thaliana	light responsive element
Potri.011G077400.1	ACE	GACACGTATG	1337	9	+	Petroselinum crispum	light responsive element
Potri.011G077400.1	G-Box	CACGTG	1339	6	-	Pisum sativum	light responsive element
Potri.011G077400.1	TGA-element	AACGAC	1937	6	-	Brassica oleracea	auxin responsiveness
Potri.011G077400.1	MSA-like	TCAAACGGT	1171	9	+	Catharanthus roseus	cell cycle regulation
Potri.011G077400.1	ABRE	ACGTG	73	5	+	Arabidopsis thaliana	abscisic acid responsiveness
Potri.011G077400.1	ABRE	ACGTG	1288	5	+	Arabidopsis thaliana	abscisic acid responsiveness
Potri.011G077400.1	ABRE	CGCACGTGTC	1337	9	-	Hordeum vulgare	abscisic acid responsiveness
Potri.011G077400.1	ABRE	CACGTG	1339	6	-	Arabidopsis thaliana	abscisic acid responsiveness
Potri.011G077400.1	ABRE	ACGTG	1340	5	+	Arabidopsis thaliana	abscisic acid responsiveness
Potri.011G077400.1	TCCC-motif	TCTCCCT	1131	7	-	Spinacia oleracea	light responsive element
Potri.011G077400.1	TCCC-motif	TCTCCCT	1272	7	-	Spinacia oleracea	light responsive element
Potri.011G077400.1	TGACG-motif	TGACG	998	5	+	Hordeum vulgare	MeJA-responsiveness
Potri.011G077400.1	TGACG-motif	TGACG	1286	5	+	Hordeum vulgare	MeJA-responsiveness
Potri.011G077400.1	MRE	AACCTAA	1196	7	-	Petroselinum crispum	light responsive element
Potri.011G077400.1	CGTCA-motif	CGTCA	998	5	-	Hordeum vulgare	MeJA-responsiveness
Potri.011G077400.1	CGTCA-motif	CGTCA	1286	5	-	Hordeum vulgare	MeJA-responsiveness
Potri.011G077400.1	Box 4	ATTAAT	1413	6	-	Petroselinum crispum	light responsive element
Potri.011G077400.1	TCA-element	CCATCTTTTT	1753	9	+	Nicotiana tabacum	light responsive element
Potri.011G077400.1	TCA-element	CCATCTTTTT	1900	9	+	Nicotiana tabacum	light responsive element
Potri.011G077400.1	I-box	cCATATCCAAT	884	10	-	Flaveria trinervia	light responsive element
Potri.013G005700.1	GATA-motif	GATAGGA	1602	7	+	Arabidopsis thaliana	light responsive element
Potri.013G005700.1	GATA-motif	GATAGGA	1942	7	-	Arabidopsis thaliana	light responsive element
Potri.013G005700.1	G-Box	CACGTT	800	6	+	Pisum sativum	light responsive element
Potri.013G005700.1	G-box	TACGTG	1496	6	+	Arabidopsis thaliana	light responsive element
Potri.013G005700.1	LAMP-element	CTTTATCA	200	8	-	Pisum sativum	light responsive element
Potri.013G005700.1	MBS	CAACTG	603	6	+	Arabidopsis thaliana	drought-inducibility
Potri.013G005700.1	MBS	CAACTG	1901	6	+	Arabidopsis thaliana	drought-inducibility
Potri.013G005700.1	GT1-motif	GGTTAA	1377	6	-	Arabidopsis thaliana	light responsive element
Potri.013G005700.1	TCT-motif	TCTTAC	1584	6	-	Arabidopsis thaliana	light responsive element
Potri.013G005700.1	ARE	AAACCA	1003	6	-	Zea mays	anaerobic induction
Potri.013G005700.1	ABRE	ACGTG	800	5	-	Arabidopsis thaliana	abscisic acid responsiveness
Potri.013G005700.1	ABRE	GCAACGTGTC	938	9	-	Hordeum vulgare	abscisic acid responsiveness
Potri.013G005700.1	ABRE	ACGTG	1497	5	+	Arabidopsis thaliana	abscisic acid responsiveness
Potri.013G005700.1	TATC-box	TATCCCA	567	7	+	Oryza sativa	gibberellin-responsive element
Potri.013G005700.1	TATC-box	TATCCCA	1704	7	+	Oryza sativa	gibberellin-responsive element
Potri.013G005700.1	TGA-element	AACGAC	1525	6	+	Brassica oleracea	auxin responsiveness
Potri.013G005700.1	LTR	CCGAAA	1190	6	+	Hordeum vulgare	low-temperature responsiveness
Potri.013G005700.1	TGACG-motif	TGACG	1566	5	+	Hordeum vulgare	MeJA-responsiveness
Potri.013G005700.1	TC-rich repeats	GTTTTCTTAC	1584	9	-	Nicotiana tabacum	defense and stress responsiveness
Potri.013G005700.1	TC-rich repeats	GTTTTCTTAC	1649	9	-	Nicotiana tabacum	defense and stress responsiveness
Potri.013G005700.1	TCA-element	CCATCTTTTT	430	9	-	Nicotiana tabacum	light responsive element
Potri.013G005700.1	TCA-element	CCATCTTTTT	1686	10	+	Nicotiana tabacum	light responsive element
Potri.013G005700.1	TCA-element	CCATCTTTTT	1796	9	+	Nicotiana tabacum	light responsive element
Potri.013G005700.1	Box 4	ATTAAT	414	6	+	Petroselinum crispum	light responsive element
Potri.013G005700.1	Box 4	ATTAAT	1313	6	-	Petroselinum crispum	light responsive element
Potri.013G005700.1	Box III	atCATTTTCACt	283	11	-	Pisum sativum	protein binding site
Potri.013G005700.1	CGTCA-motif	CGTCA	1566	5	-	Hordeum vulgare	MeJA-responsiveness
Potri.013G005700.1	O2-site	GATGACATGG	1127	9	+	Zea mays	zein metabolism regulation
Potri.013G005700.1	AuxRR-core	GGTCCAT	749	7	+	Nicotiana tabacum	auxin responsiveness
Potri.013G152400.1	O2-site	GATGACATGG	1293	9	+	Zea mays	zein metabolism regulation
Potri.013G152400.1	CGTCA-motif	CGTCA	941	5	-	Hordeum vulgare	MeJA-responsiveness
Potri.013G152400.1	CGTCA-motif	CGTCA	1786	5	-	Hordeum vulgare	MeJA-responsiveness
Potri.013G152400.1	chs-CMA1a	TTACTTAA	1715	8	-	Daucus carota	light responsive element
Potri.013G152400.1	Box 4	ATTAAT	567	6	+	Petroselinum crispum	light responsive element
Potri.013G152400.1	Box 4	ATTAAT	726	6	+	Petroselinum crispum	light responsive element
Potri.013G152400.1	Box 4	ATTAAT	790	6	+	Petroselinum crispum	light responsive element
Potri.013G152400.1	Box 4	ATTAAT	1415	6	-	Petroselinum crispum	light responsive element
Potri.013G152400.1	ATCT-motif	AATCTAATCC	783	9	-	Pisum sativum	light responsive element
Potri.013G152400.1	GA-motif	ATAGATAA	1409	8	-	Arabidopsis thaliana	light responsive element
Potri.013G152400.1	TGACG-motif	TGACG	941	5	+	Hordeum vulgare	MeJA-responsiveness
Potri.013G152400.1	TGACG-motif	TGACG	1786	5	+	Hordeum vulgare	MeJA-responsiveness
Potri.013G152400.1	ABRE	ACGTG	943	5	+	Arabidopsis thaliana	abscisic acid responsiveness
Potri.013G152400.1	ABRE	GACACGTGGC	1116	9	-	Triticum aestivum	abscisic acid responsiveness
Potri.013G152400.1	ABRE	CACGTG	1118	6	-	Arabidopsis thaliana	abscisic acid responsiveness
Potri.013G152400.1	ABRE	ACGTG	1119	5	+	Arabidopsis thaliana	abscisic acid responsiveness
Potri.013G152400.1	ABRE	ACGTG	1285	5	+	Arabidopsis thaliana	abscisic acid responsiveness
Potri.013G152400.1	ABRE	ACGTG	1788	5	+	Arabidopsis thaliana	abscisic acid responsiveness
Potri.013G152400.1	ARE	AAACCA	804	6	+	Zea mays	anaerobic induction
Potri.013G152400.1	CAT-box	GCCACT	1809	6	-	Arabidopsis thaliana	meristem expression
Potri.013G152400.1	MBS	CAACTG	1083	6	+	Arabidopsis thaliana	drought-inducibility
Potri.013G152400.1	MBS	CAACTG	1149	6	+	Arabidopsis thaliana	drought-inducibility
Potri.013G152400.1	G-Box	CACGTG	1118	6	-	Pisum sativum	light responsive element
Potri.013G152400.1	G-box	CACGTC	942	6	-	Zea mays	light responsive element
Potri.013G152400.1	G-box	tgACACGTGGCA	1115	11	-	Lycopersicon esculentum	light responsive element
Potri.013G152400.1	G-box	CACGTG	1118	6	-	Arabidopsis thaliana	light responsive element
Potri.013G152400.1	G-box	CAGACGTGGCA	1282	10	+	Nicotiana plumbaginifolia	light responsive element
Potri.013G152400.1	G-box	CACGTC	1284	6	-	Zea mays	light responsive element
Potri.013G152400.1	G-box	CACGTC	1787	6	-	Zea mays	light responsive element
Potri.013G152400.1	GATA-motif	AAGATAAGATT	782	10	+	Arabidopsis thaliana	light responsive element
Potri.014G115000.1	TGACG-motif	TGACG	1974	5	-	Hordeum vulgare	MeJA-responsiveness
Potri.014G115000.1	TGACG-motif	TGACG	1989	5	-	Hordeum vulgare	MeJA-responsiveness
Potri.014G115000.1	ATCT-motif	AATCTAATCC	544	9	+	Pisum sativum	light responsive element
Potri.014G115000.1	TC-rich repeats	GTTTTCTTAC	557	9	-	Nicotiana tabacum	defense and stress responsiveness
Potri.014G115000.1	TC-rich repeats	ATTCTCTAAC	1070	9	+	Nicotiana tabacum	defense and stress responsiveness
Potri.014G115000.1	TC-rich repeats	ATTCTCTAAC	1731	9	-	Nicotiana tabacum	defense and stress responsiveness
Potri.014G115000.1	Box 4	ATTAAT	407	6	+	Petroselinum crispum	light responsive element
Potri.014G115000.1	Box 4	ATTAAT	599	6	+	Petroselinum crispum	light responsive element
Potri.014G115000.1	Box 4	ATTAAT	645	6	+	Petroselinum crispum	light responsive element
Potri.014G115000.1	Box 4	ATTAAT	1362	6	-	Petroselinum crispum	light responsive element
Potri.014G115000.1	TCA-element	CCATCTTTTT	131	9	-	Nicotiana tabacum	light responsive element
Potri.014G115000.1	CGTCA-motif	CGTCA	1974	5	+	Hordeum vulgare	MeJA-responsiveness
Potri.014G115000.1	CGTCA-motif	CGTCA	1989	5	+	Hordeum vulgare	MeJA-responsiveness
Potri.014G115000.1	O2-site	GTTGACGTGA	1986	9	-	Zea mays	zein metabolism regulation
Potri.014G115000.1	GATA-motif	AAGATAAGATT	1354	10	+	Arabidopsis thaliana	light responsive element
Potri.014G115000.1	G-box	CACGTG	1420	6	-	Arabidopsis thaliana	light responsive element
Potri.014G115000.1	G-box	CACGTC	1987	6	+	Zea mays	light responsive element
Potri.014G115000.1	G-Box	CACGTT	1273	6	-	Pisum sativum	light responsive element
Potri.014G115000.1	G-Box	CACGTG	1420	6	-	Pisum sativum	light responsive element
Potri.014G115000.1	MBS	CAACTG	493	6	+	Arabidopsis thaliana	drought-inducibility
Potri.014G115000.1	TCT-motif	TCTTAC	153	6	+	Arabidopsis thaliana	light responsive element
Potri.014G115000.1	TCT-motif	TCTTAC	557	6	-	Arabidopsis thaliana	light responsive element
Potri.014G115000.1	TCT-motif	TCTTAC	1259	6	-	Arabidopsis thaliana	light responsive element
Potri.014G115000.1	TCT-motif	TCTTAC	1731	6	-	Arabidopsis thaliana	light responsive element
Potri.014G115000.1	ARE	AAACCA	821	6	-	Zea mays	anaerobic induction
Potri.014G115000.1	ARE	AAACCA	1252	6	+	Zea mays	anaerobic induction
Potri.014G115000.1	ARE	AAACCA	1820	6	+	Zea mays	anaerobic induction
Potri.014G115000.1	GT1-motif	GGTTAA	1313	6	+	Arabidopsis thaliana	light responsive element
Potri.014G115000.1	ABRE	ACGTG	1274	5	+	Arabidopsis thaliana	abscisic acid responsiveness
Potri.014G115000.1	ABRE	CACGTG	1420	6	-	Arabidopsis thaliana	abscisic acid responsiveness
Potri.014G115000.1	ABRE	ACGTG	1421	5	+	Arabidopsis thaliana	abscisic acid responsiveness
Potri.014G115000.1	ABRE	ACGTG	1987	5	-	Arabidopsis thaliana	abscisic acid responsiveness
Potri.014G115000.1	TGA-element	AACGAC	360	6	-	Brassica oleracea	auxin responsiveness
Potri.014G115000.1	circadian	CAAAGATATC	395	9	+	Lycopersicon esculentum	circadian control
Potri.014G115000.1	circadian	CAAAGATATC	1154	10	+	Lycopersicon esculentum	circadian control
Potri.014G140300.1	MBS	CAACTG	796	6	+	Arabidopsis thaliana	drought-inducibility
Potri.014G140300.1	ATC-motif	AGCTATCCA	969	9	-	Arabidopsis thaliana	light responsive element
Potri.014G140300.1	GC-motif	CCCCCG	1910	6	-	Zea mays	anoxic specific inducibility
Potri.014G140300.1	G-Box	CACGTG	178	6	+	Pisum sativum	light responsive element
Potri.014G140300.1	G-Box	CACGTG	674	6	+	Pisum sativum	light responsive element
Potri.014G140300.1	G-Box	CACGTT	1568	6	-	Pisum sativum	light responsive element
Potri.014G140300.1	G-Box	CACGTT	1717	6	+	Pisum sativum	light responsive element
Potri.014G140300.1	G-box	CACGTG	178	6	+	Arabidopsis thaliana	light responsive element
Potri.014G140300.1	G-box	GCCACGTGGA	492	9	+	Arabidopsis thaliana	light responsive element
Potri.014G140300.1	G-box	CACGTC	494	6	-	Zea mays	light responsive element
Potri.014G140300.1	G-box	TACGTG	610	6	+	Arabidopsis thaliana	light responsive element
Potri.014G140300.1	G-box	CACGTG	674	6	+	Arabidopsis thaliana	light responsive element
Potri.014G140300.1	TGA-element	AACGAC	465	6	-	Brassica oleracea	auxin responsiveness
Potri.014G140300.1	ABRE	CACGTG	178	6	+	Arabidopsis thaliana	abscisic acid responsiveness
Potri.014G140300.1	ABRE	ACGTG	179	5	+	Arabidopsis thaliana	abscisic acid responsiveness
Potri.014G140300.1	ABRE	ACGTG	495	5	+	Arabidopsis thaliana	abscisic acid responsiveness
Potri.014G140300.1	ABRE	ACGTG	611	5	+	Arabidopsis thaliana	abscisic acid responsiveness
Potri.014G140300.1	ABRE	CACGTG	674	6	+	Arabidopsis thaliana	abscisic acid responsiveness
Potri.014G140300.1	ABRE	ACGTG	675	5	+	Arabidopsis thaliana	abscisic acid responsiveness
Potri.014G140300.1	ABRE	ACGTG	1569	5	+	Arabidopsis thaliana	abscisic acid responsiveness
Potri.014G140300.1	ABRE	ACGTG	1717	5	-	Arabidopsis thaliana	abscisic acid responsiveness
Potri.014G140300.1	GARE-motif	TCTGTTG	1957	7	+	Brassica oleracea	gibberellin-responsive element
Potri.014G140300.1	TGACG-motif	TGACG	1782	5	-	Hordeum vulgare	MeJA-responsiveness
Potri.014G140300.1	3-AF1 binding site	TAAGAGAGGAA	304	10	+	Solanum tuberosum	light responsive element
Potri.014G140300.1	AE-box	AGAAACTT	417	8	+	Arabidopsis thaliana	light responsive element
Potri.014G140300.1	CGTCA-motif	CGTCA	1782	5	+	Hordeum vulgare	MeJA-responsiveness
Potri.014G140300.1	O2-site	GATGACATGG	137	9	-	Zea mays	zein metabolism regulation
Potri.014G140300.1	O2-site	GATGATGTGG	848	9	+	Zea mays	zein metabolism regulation
Potri.014G140300.1	AuxRR-core	GGTCCAT	627	7	-	Nicotiana tabacum	auxin responsiveness
Potri.014G140300.1	Box 4	ATTAAT	203	6	+	Petroselinum crispum	light responsive element
Potri.014G140300.1	Box 4	ATTAAT	925	6	+	Petroselinum crispum	light responsive element
Potri.014G146100.1	GC-motif	CCCCCG	1369	6	-	Zea mays	anoxic specific inducibility
Potri.014G146100.1	G-box	CACGTC	363	6	+	Zea mays	light responsive element
Potri.014G146100.1	G-box	CCACGTAA	1235	8	-	Brassica napus	light responsive element
Potri.014G146100.1	G-box	TACGTG	1236	6	+	Arabidopsis thaliana	light responsive element
Potri.014G146100.1	GATA-motif	GATAGGG	728	7	-	Pisum sativum	light responsive element
Potri.014G146100.1	GT1-motif	GGTTAA	422	6	-	Arabidopsis thaliana	light responsive element
Potri.014G146100.1	GT1-motif	GGTTAA	452	6	-	Arabidopsis thaliana	light responsive element
Potri.014G146100.1	ARE	AAACCA	496	6	+	Zea mays	anaerobic induction
Potri.014G146100.1	ARE	AAACCA	1398	6	-	Zea mays	anaerobic induction
Potri.014G146100.1	ARE	AAACCA	1514	6	+	Zea mays	anaerobic induction
Potri.014G146100.1	TCT-motif	TCTTAC	1202	6	-	Arabidopsis thaliana	light responsive element
Potri.014G146100.1	LAMP-element	CTTTATCA	1262	8	-	Pisum sativum	light responsive element
Potri.014G146100.1	CAT-box	GCCACT	390	6	+	Arabidopsis thaliana	meristem expression
Potri.014G146100.1	ABRE	ACGTG	363	5	-	Arabidopsis thaliana	abscisic acid responsiveness
Potri.014G146100.1	ABRE	ACGTG	1237	5	+	Arabidopsis thaliana	abscisic acid responsiveness
Potri.014G146100.1	RY-element	CATGCATG	890	8	+	Helianthus annuus	seed-specific regulation
Potri.014G146100.1	TGACG-motif	TGACG	320	5	+	Hordeum vulgare	MeJA-responsiveness
Potri.014G146100.1	TGACG-motif	TGACG	325	5	-	Hordeum vulgare	MeJA-responsiveness
Potri.014G146100.1	LTR	CCGAAA	1275	6	+	Hordeum vulgare	low-temperature responsiveness
Potri.014G146100.1	Box 4	ATTAAT	164	6	+	Petroselinum crispum	light responsive element
Potri.014G146100.1	Box 4	ATTAAT	217	6	+	Petroselinum crispum	light responsive element
Potri.014G146100.1	Box 4	ATTAAT	960	6	+	Petroselinum crispum	light responsive element
Potri.014G146100.1	Box 4	ATTAAT	1423	6	-	Petroselinum crispum	light responsive element
Potri.014G146100.1	Box 4	ATTAAT	1457	6	-	Petroselinum crispum	light responsive element
Potri.014G146100.1	Box 4	ATTAAT	1621	6	-	Petroselinum crispum	light responsive element
Potri.014G146100.1	Box 4	ATTAAT	1655	6	-	Petroselinum crispum	light responsive element
Potri.014G146100.1	A-box	CCGTCC	811	6	-	Petroselinum crispum	cis-acting regulatory element
Potri.014G146100.1	AuxRR-core	GGTCCAT	1373	7	+	Nicotiana tabacum	auxin responsiveness
Potri.014G146100.1	AT1-motif	AATTATTTTTTATT	912	13	+	Solanum tuberosum	light responsive element
Potri.014G146100.1	C-box	ACGAGCACCGCC	1138	11	+	Hordeum vulgare	light responsive element
Potri.014G146100.1	CGTCA-motif	CGTCA	320	5	-	Hordeum vulgare	MeJA-responsiveness
Potri.014G146100.1	CGTCA-motif	CGTCA	325	5	+	Hordeum vulgare	MeJA-responsiveness
Potri.014G152700.1	Sp1	GGGCGG	1837	6	-	Oryza sativa	light responsive element
Potri.014G152700.1	ARE	AAACCA	538	6	+	Zea mays	anaerobic induction
Potri.014G152700.1	ARE	AAACCA	1727	6	+	Zea mays	anaerobic induction
Potri.014G152700.1	ARE	AAACCA	1753	6	-	Zea mays	anaerobic induction
Potri.014G152700.1	TCT-motif	TCTTAC	1037	6	+	Arabidopsis thaliana	light responsive element
Potri.014G152700.1	GT1-motif	GGTTAAT	1402	7	+	Avena sativa	light responsive element
Potri.014G152700.1	G-box	TACGTG	1042	6	-	Arabidopsis thaliana	light responsive element
Potri.014G152700.1	G-box	CACGAC	1155	6	-	Zea mays	light responsive element
Potri.014G152700.1	ABRE	ACGTG	1042	5	-	Arabidopsis thaliana	abscisic acid responsiveness
Potri.014G152700.1	Gap-box	CAAATGAA(A/G)A	94	9.5	+	Arabidopsis thaliana	light responsive element
Potri.014G152700.1	AT1-motif	AATTATTTTTTATT	437	13	+	Solanum tuberosum	light responsive element
Potri.014G152700.1	A-box	CCGTCC	1963	6	-	Petroselinum crispum	cis-acting regulatory element
Potri.014G152700.1	Box 4	ATTAAT	642	6	+	Petroselinum crispum	light responsive element
Potri.014G152700.1	Box 4	ATTAAT	937	6	+	Petroselinum crispum	light responsive element
Potri.014G152700.1	Box 4	ATTAAT	1009	6	-	Petroselinum crispum	light responsive element
Potri.014G152700.1	Box 4	ATTAAT	1013	6	-	Petroselinum crispum	light responsive element
Potri.014G152700.1	Box 4	ATTAAT	1463	6	-	Petroselinum crispum	light responsive element
Potri.016G098600.1	O2-site	GATGATGTGG	1188	9	-	Zea mays	zein metabolism regulation
Potri.016G098600.1	CGTCA-motif	CGTCA	88	5	+	Hordeum vulgare	MeJA-responsiveness
Potri.016G098600.1	TCA-element	CCATCTTTTT	1747	9	+	Nicotiana tabacum	light responsive element
Potri.016G098600.1	Box 4	ATTAAT	1288	6	-	Petroselinum crispum	light responsive element
Potri.016G098600.1	TC-rich repeats	ATTCTCTAAC	1783	9	+	Nicotiana tabacum	defense and stress responsiveness
Potri.016G098600.1	ATCT-motif	AATCTAATCC	1359	9	+	Pisum sativum	light responsive element
Potri.016G098600.1	LTR	CCGAAA	678	6	+	Hordeum vulgare	low-temperature responsiveness
Potri.016G098600.1	TGACG-motif	TGACG	88	5	-	Hordeum vulgare	MeJA-responsiveness
Potri.016G098600.1	MRE	AACCTAA	1464	7	-	Petroselinum crispum	light responsive element
Potri.016G098600.1	MRE	AACCTAA	1573	7	+	Petroselinum crispum	light responsive element
Potri.016G098600.1	TCCC-motif	TCTCCCT	1605	7	+	Spinacia oleracea	light responsive element
Potri.016G098600.1	ABRE	ACGTG	1510	5	+	Arabidopsis thaliana	abscisic acid responsiveness
Potri.016G098600.1	ABRE	ACGTG	1896	5	-	Arabidopsis thaliana	abscisic acid responsiveness
Potri.016G098600.1	TCT-motif	TCTTAC	1640	6	+	Arabidopsis thaliana	light responsive element
Potri.016G098600.1	LAMP-element	CTTTATCA	1856	8	+	Pisum sativum	light responsive element
Potri.016G098600.1	MBS	CAACTG	278	6	+	Arabidopsis thaliana	drought-inducibility
Potri.016G098600.1	MBS	CAACTG	1862	6	+	Arabidopsis thaliana	drought-inducibility
Potri.016G098600.1	G-box	CACGAC	1482	6	-	Zea mays	light responsive element
Potri.016G098600.1	G-box	TACGTG	1509	6	+	Arabidopsis thaliana	light responsive element
Potri.016G098600.1	G-box	CCACGTAA	1895	8	+	Brassica napus	light responsive element
Potri.016G098600.1	G-box	TACGTG	1896	6	-	Arabidopsis thaliana	light responsive element
Potri.018G084300.1	AE-box	AGAAACTT	1870	8	+	Arabidopsis thaliana	light responsive element
Potri.018G084300.1	AE-box	AGAAACTT	1977	8	+	Arabidopsis thaliana	light responsive element
Potri.018G084300.1	TGACG-motif	TGACG	1204	5	-	Hordeum vulgare	MeJA-responsiveness
Potri.018G084300.1	TGACG-motif	TGACG	1831	5	-	Hordeum vulgare	MeJA-responsiveness
Potri.018G084300.1	Box 4	ATTAAT	846	6	+	Petroselinum crispum	light responsive element
Potri.018G084300.1	Box 4	ATTAAT	1412	6	-	Petroselinum crispum	light responsive element
Potri.018G084300.1	chs-CMA2a	TCACTTGA	349	8	-	Petroselinum crispum	light responsive element
Potri.018G084300.1	CGTCA-motif	CGTCA	1204	5	+	Hordeum vulgare	MeJA-responsiveness
Potri.018G084300.1	CGTCA-motif	CGTCA	1831	5	+	Hordeum vulgare	MeJA-responsiveness
Potri.018G084300.1	G-box	CACGTC	1089	6	-	Zea mays	light responsive element
Potri.018G084300.1	ARE	AAACCA	53	6	+	Zea mays	anaerobic induction
Potri.018G084300.1	ARE	AAACCA	1024	6	-	Zea mays	anaerobic induction
Potri.018G084300.1	GT1-motif	GGTTAAT	1788	7	-	Avena sativa	light responsive element
Potri.018G084300.1	GT1-motif	GGTTAA	1789	6	-	Arabidopsis thaliana	light responsive element
Potri.018G084300.1	LAMP-element	CTTTATCA	41	8	-	Pisum sativum	light responsive element
Potri.018G084300.1	ABRE	ACGTG	1090	5	+	Arabidopsis thaliana	abscisic acid responsiveness
Potri.018G094800.1	G-box	CACGAC	1307	6	+	Zea mays	light responsive element
Potri.018G094800.1	G-Box	CACGTT	32	6	-	Pisum sativum	light responsive element
Potri.018G094800.1	GT1-motif	GGTTAA	1302	6	-	Arabidopsis thaliana	light responsive element
Potri.018G094800.1	ARE	AAACCA	340	6	-	Zea mays	anaerobic induction
Potri.018G094800.1	CAT-box	GCCACT	612	6	-	Arabidopsis thaliana	meristem expression
Potri.018G094800.1	ABRE	ACGTG	33	5	+	Arabidopsis thaliana	abscisic acid responsiveness
Potri.018G094800.1	TGA-element	AACGAC	1540	6	+	Brassica oleracea	auxin responsiveness
Potri.018G094800.1	TATC-box	TATCCCA	420	7	-	Oryza sativa	gibberellin-responsive element
Potri.018G094800.1	ATCT-motif	AATCTAATCC	1686	9	-	Pisum sativum	light responsive element
Potri.018G094800.1	TC-rich repeats	GTTTTCTTAC	1477	9	+	Nicotiana tabacum	defense and stress responsiveness
Potri.018G094800.1	TC-rich repeats	ATTCTCTAAC	1762	9	-	Nicotiana tabacum	defense and stress responsiveness
Potri.018G094800.1	TGACG-motif	TGACG	109	5	+	Hordeum vulgare	MeJA-responsiveness
Potri.018G094800.1	TGACG-motif	TGACG	861	5	+	Hordeum vulgare	MeJA-responsiveness
Potri.018G094800.1	TGACG-motif	TGACG	1698	5	-	Hordeum vulgare	MeJA-responsiveness
Potri.018G094800.1	Box 4	ATTAAT	352	6	+	Petroselinum crispum	light responsive element
Potri.018G094800.1	Box 4	ATTAAT	402	6	+	Petroselinum crispum	light responsive element
Potri.018G094800.1	Box 4	ATTAAT	574	6	+	Petroselinum crispum	light responsive element
Potri.018G094800.1	Box 4	ATTAAT	914	6	+	Petroselinum crispum	light responsive element
Potri.018G094800.1	CGTCA-motif	CGTCA	109	5	-	Hordeum vulgare	MeJA-responsiveness
Potri.018G094800.1	CGTCA-motif	CGTCA	861	5	-	Hordeum vulgare	MeJA-responsiveness
Potri.018G094800.1	CGTCA-motif	CGTCA	1698	5	+	Hordeum vulgare	MeJA-responsiveness
Potri.018G094900.1	Box 4	ATTAAT	212	6	+	Petroselinum crispum	light responsive element
Potri.018G094900.1	Box 4	ATTAAT	385	6	+	Petroselinum crispum	light responsive element
Potri.018G094900.1	Box 4	ATTAAT	572	6	+	Petroselinum crispum	light responsive element
Potri.018G094900.1	Box 4	ATTAAT	660	6	+	Petroselinum crispum	light responsive element
Potri.018G094900.1	Box 4	ATTAAT	741	6	+	Petroselinum crispum	light responsive element
Potri.018G094900.1	Box 4	ATTAAT	1565	6	-	Petroselinum crispum	light responsive element
Potri.018G094900.1	A-box	CCGTCC	1183	6	-	Petroselinum crispum	cis-acting regulatory element
Potri.018G094900.1	G-box	CACGTC	1150	6	-	Zea mays	light responsive element
Potri.018G094900.1	GC-motif	CCCCCG	23	6	+	Zea mays	anoxic specific inducibility
Potri.018G094900.1	GC-motif	CCCCCG	1513	6	-	Zea mays	anoxic specific inducibility
Potri.018G094900.1	MBS	CAACTG	1840	6	-	Arabidopsis thaliana	drought-inducibility
Potri.018G094900.1	ARE	AAACCA	1251	6	-	Zea mays	anaerobic induction
Potri.018G094900.1	ARE	AAACCA	1410	6	-	Zea mays	anaerobic induction
Potri.018G094900.1	ARE	AAACCA	1534	6	-	Zea mays	anaerobic induction
Potri.018G094900.1	ARE	AAACCA	1975	6	+	Zea mays	anaerobic induction
Potri.018G094900.1	TCT-motif	TCTTAC	1156	6	-	Arabidopsis thaliana	light responsive element
Potri.018G094900.1	GT1-motif	GGTTAA	375	6	-	Arabidopsis thaliana	light responsive element
Potri.018G094900.1	GT1-motif	GGTTAA	619	6	-	Arabidopsis thaliana	light responsive element
Potri.018G094900.1	ABRE	CGTACGTGCA	271	9	-	Hordeum vulgare	abscisic acid responsiveness
Potri.018G094900.1	ABRE	ACGTG	1151	5	+	Arabidopsis thaliana	abscisic acid responsiveness
Potri.018G095100.1	CGTCA-motif	CGTCA	713	5	-	Hordeum vulgare	MeJA-responsiveness
Potri.018G095100.1	chs-CMA2a	TCACTTGA	471	8	+	Petroselinum crispum	light responsive element
Potri.018G095100.1	Box 4	ATTAAT	766	6	+	Petroselinum crispum	light responsive element
Potri.018G095100.1	Box 4	ATTAAT	1070	6	-	Petroselinum crispum	light responsive element
Potri.018G095100.1	L-box	ATCCCACCTAC	1932	10	+	Petroselinum crispum	light responsive element
Potri.018G095100.1	I-box	gGATAAGGTG	111	9	-	Zea mays	light responsive element
Potri.018G095100.1	TCA-element	CCATCTTTTT	411	9	-	Nicotiana tabacum	light responsive element
Potri.018G095100.1	GARE-motif	TCTGTTG	531	7	-	Brassica oleracea	gibberellin-responsive element
Potri.018G095100.1	TGACG-motif	TGACG	713	5	+	Hordeum vulgare	MeJA-responsiveness
Potri.018G095100.1	ATCT-motif	AATCTAATCC	1489	9	-	Pisum sativum	light responsive element
Potri.018G095100.1	GA-motif	ATAGATAA	1479	8	-	Arabidopsis thaliana	light responsive element
Potri.018G095100.1	ABRE	AACCCGG	464	7	+	Arabidopsis thaliana	abscisic acid responsiveness
Potri.018G095100.1	ABRE	ACGTG	856	5	-	Arabidopsis thaliana	abscisic acid responsiveness
Potri.018G095100.1	MBS	CAACTG	1049	6	+	Arabidopsis thaliana	drought-inducibility
Potri.018G095100.1	TCT-motif	TCTTAC	1808	6	+	Arabidopsis thaliana	light responsive element
Potri.018G095100.1	GATA-motif	GATAGGG	113	7	-	Pisum sativum	light responsive element
Potri.018G095100.1	G-box	CACGTC	856	6	+	Zea mays	light responsive element
Potri.018G095200.1	TGACG-motif	TGACG	631	5	+	Hordeum vulgare	MeJA-responsiveness
Potri.018G095200.1	TGACG-motif	TGACG	1680	5	+	Hordeum vulgare	MeJA-responsiveness
Potri.018G095200.1	L-box	ATCCCACCTAC	1932	11	+	Petroselinum crispum	light responsive element
Potri.018G095200.1	Box 4	ATTAAT	490	6	+	Petroselinum crispum	light responsive element
Potri.018G095200.1	Box 4	ATTAAT	762	6	+	Petroselinum crispum	light responsive element
Potri.018G095200.1	Box 4	ATTAAT	823	6	+	Petroselinum crispum	light responsive element
Potri.018G095200.1	Box 4	ATTAAT	1034	6	-	Petroselinum crispum	light responsive element
Potri.018G095200.1	Box 4	ATTAAT	1463	6	-	Petroselinum crispum	light responsive element
Potri.018G095200.1	CGTCA-motif	CGTCA	631	5	-	Hordeum vulgare	MeJA-responsiveness
Potri.018G095200.1	CGTCA-motif	CGTCA	1680	5	-	Hordeum vulgare	MeJA-responsiveness
Potri.018G095200.1	G-Box	CACGTT	238	6	+	Pisum sativum	light responsive element
Potri.018G095200.1	GATA-motif	AAGATAAGATT	85	10	+	Arabidopsis thaliana	light responsive element
Potri.018G095200.1	TCT-motif	TCTTAC	1808	6	+	Arabidopsis thaliana	light responsive element
Potri.018G095200.1	ARE	AAACCA	519	6	+	Zea mays	anaerobic induction
Potri.018G095200.1	ARE	AAACCA	1090	6	-	Zea mays	anaerobic induction
Potri.018G095200.1	MBS	CAACTG	1531	6	+	Arabidopsis thaliana	drought-inducibility
Potri.018G095200.1	ABRE	ACGTG	238	5	-	Arabidopsis thaliana	abscisic acid responsiveness
Potri.019G125000.1	O2-site	GATGA(C/T)(A/G)TG(A/G)	670	8	+	Zea mays	zein metabolism regulation
Potri.019G125000.1	O2-site	GATGACATGG	1022	9	+	Zea mays	zein metabolism regulation
Potri.019G125000.1	AT1-motif	AATTATTTTTTATT	387	13	+	Solanum tuberosum	light responsive element
Potri.019G125000.1	CGTCA-motif	CGTCA	672	5	-	Hordeum vulgare	MeJA-responsiveness
Potri.019G125000.1	CGTCA-motif	CGTCA	1772	5	-	Hordeum vulgare	MeJA-responsiveness
Potri.019G125000.1	CGTCA-motif	CGTCA	1792	5	-	Hordeum vulgare	MeJA-responsiveness
Potri.019G125000.1	chs-CMA1a	TTACTTAA	252	8	-	Daucus carota	light responsive element
Potri.019G125000.1	P-box	CCTTTTG	883	7	+	Oryza sativa	gibberellin-responsive element
Potri.019G125000.1	Box 4	ATTAAT	55	6	+	Petroselinum crispum	light responsive element
Potri.019G125000.1	Box 4	ATTAAT	408	6	+	Petroselinum crispum	light responsive element
Potri.019G125000.1	Box 4	ATTAAT	624	6	+	Petroselinum crispum	light responsive element
Potri.019G125000.1	Box 4	ATTAAT	1353	6	-	Petroselinum crispum	light responsive element
Potri.019G125000.1	Box 4	ATTAAT	1357	6	-	Petroselinum crispum	light responsive element
Potri.019G125000.1	Box 4	ATTAAT	1664	6	-	Petroselinum crispum	light responsive element
Potri.019G125000.1	A-box	CCGTCC	1065	6	+	Petroselinum crispum	cis-acting regulatory element
Potri.019G125000.1	TC-rich repeats	GTTTTCTTAC	1302	9	+	Nicotiana tabacum	defense and stress responsiveness
Potri.019G125000.1	TC-rich repeats	ATTCTCTAAC	1786	9	+	Nicotiana tabacum	defense and stress responsiveness
Potri.019G125000.1	ATCT-motif	AATCTAATCC	164	9	-	Pisum sativum	light responsive element
Potri.019G125000.1	LTR	CCGAAA	1903	6	-	Hordeum vulgare	low-temperature responsiveness
Potri.019G125000.1	TGACG-motif	TGACG	672	5	+	Hordeum vulgare	MeJA-responsiveness
Potri.019G125000.1	TGACG-motif	TGACG	1772	5	+	Hordeum vulgare	MeJA-responsiveness
Potri.019G125000.1	TGACG-motif	TGACG	1792	5	+	Hordeum vulgare	MeJA-responsiveness
Potri.019G125000.1	AE-box	AGAAACTT	654	8	-	Arabidopsis thaliana	light responsive element
Potri.019G125000.1	AE-box	AGAAACTT	1211	8	+	Arabidopsis thaliana	light responsive element
Potri.019G125000.1	MRE	AACCTAA	1495	7	+	Petroselinum crispum	light responsive element
Potri.019G125000.1	TATC-box	TATCCCA	1777	7	-	Oryza sativa	gibberellin-responsive element
Potri.019G125000.1	ABRE	ACGTG	503	5	+	Arabidopsis thaliana	abscisic acid responsiveness
Potri.019G125000.1	ABRE	ACGTG	674	5	+	Arabidopsis thaliana	abscisic acid responsiveness
Potri.019G125000.1	ABRE	GACACGTGGC	842	9	-	Triticum aestivum	abscisic acid responsiveness
Potri.019G125000.1	ABRE	ACGTG	844	5	-	Arabidopsis thaliana	abscisic acid responsiveness
Potri.019G125000.1	ABRE	ACGTG	1014	5	+	Arabidopsis thaliana	abscisic acid responsiveness
Potri.019G125000.1	ABRE	ACGTG	1111	5	+	Arabidopsis thaliana	abscisic acid responsiveness
Potri.019G125000.1	ABRE	ACGTG	1774	5	+	Arabidopsis thaliana	abscisic acid responsiveness
Potri.019G125000.1	ABRE	ACGTG	1794	5	+	Arabidopsis thaliana	abscisic acid responsiveness
Potri.019G125000.1	ARE	AAACCA	1096	6	+	Zea mays	anaerobic induction
Potri.019G125000.1	GT1-motif	GGTTAAT	67	7	+	Avena sativa	light responsive element
Potri.019G125000.1	GT1-motif	GGTTAA	1489	6	-	Arabidopsis thaliana	light responsive element
Potri.019G125000.1	MBS	CAACTG	809	6	+	Arabidopsis thaliana	drought-inducibility
Potri.019G125000.1	G-Box	CACGTT	502	6	-	Pisum sativum	light responsive element
Potri.019G125000.1	G-Box	CACGTT	844	6	+	Pisum sativum	light responsive element
Potri.019G125000.1	G-Box	CACGTT	1013	6	-	Pisum sativum	light responsive element
Potri.019G125000.1	G-Box	CACGTT	1110	6	-	Pisum sativum	light responsive element
Potri.019G125000.1	G-box	CACGTC	673	6	-	Zea mays	light responsive element
Potri.019G125000.1	G-box	tgACACGTGGCA	841	11	-	Lycopersicon esculentum	light responsive element
Potri.019G125000.1	G-box	CACGTC	1773	6	-	Zea mays	light responsive element
Potri.019G125000.1	G-box	CACGTC	1793	6	-	Zea mays	light responsive element
Potri.T112300.1	P-box	CCTTTTG	1605	7	+	Oryza sativa	gibberellin-responsive element
Potri.T112300.1	TCA-element	CCATCTTTTT	1422	9	+	Nicotiana tabacum	light responsive element
Potri.T112300.1	Box 4	ATTAAT	53	6	+	Petroselinum crispum	light responsive element
Potri.T112300.1	Box 4	ATTAAT	1007	6	-	Petroselinum crispum	light responsive element
Potri.T112300.1	Box 4	ATTAAT	1970	6	-	Petroselinum crispum	light responsive element
Potri.T112300.1	CGTCA-motif	CGTCA	690	5	-	Hordeum vulgare	MeJA-responsiveness
Potri.T112300.1	CGTCA-motif	CGTCA	734	5	-	Hordeum vulgare	MeJA-responsiveness
Potri.T112300.1	O2-site	GATGA(C/T)(A/G)TG(A/G)	510	8	-	Zea mays	zein metabolism regulation
Potri.T112300.1	MRE	AACCTAA	813	7	+	Petroselinum crispum	light responsive element
Potri.T112300.1	AE-box	AGAAACTT	346	8	-	Arabidopsis thaliana	light responsive element
Potri.T112300.1	TGACG-motif	TGACG	690	5	+	Hordeum vulgare	MeJA-responsiveness
Potri.T112300.1	TGACG-motif	TGACG	734	5	+	Hordeum vulgare	MeJA-responsiveness
Potri.T112300.1	ABRE	ACGTG	453	5	+	Arabidopsis thaliana	abscisic acid responsiveness
Potri.T112300.1	ABRE	ACGTG	504	5	+	Arabidopsis thaliana	abscisic acid responsiveness
Potri.T112300.1	ABRE	CACGTG	1377	6	-	Arabidopsis thaliana	abscisic acid responsiveness
Potri.T112300.1	ABRE	ACGTG	1378	5	+	Arabidopsis thaliana	abscisic acid responsiveness
Potri.T112300.1	ABRE	ACGTG	1837	5	+	Arabidopsis thaliana	abscisic acid responsiveness
Potri.T112300.1	ABRE	ACGTG	1981	5	-	Arabidopsis thaliana	abscisic acid responsiveness
Potri.T112300.1	GATA-motif	GATAGGA	1015	7	-	Arabidopsis thaliana	light responsive element
Potri.T112300.1	G-Box	CACGTG	1377	6	-	Pisum sativum	light responsive element
Potri.T112300.1	G-Box	CACGTT	1836	6	-	Pisum sativum	light responsive element
Potri.T112300.1	G-Box	CACGTT	1981	6	+	Pisum sativum	light responsive element
Potri.T112300.1	G-box	CACGTC	452	6	-	Zea mays	light responsive element
Potri.T112300.1	G-box	CACGTC	503	6	-	Zea mays	light responsive element
Potri.T112300.1	G-box	CACGTG	1377	6	-	Arabidopsis thaliana	light responsive element
Potri.T112300.1	CAT-box	GCCACT	740	6	-	Arabidopsis thaliana	meristem expression
Potri.T112300.1	LAMP-element	CTTTATCA	1502	8	-	Pisum sativum	light responsive element
Potri.T112300.1	ARE	AAACCA	368	6	+	Zea mays	anaerobic induction
Potri.T112300.1	ARE	AAACCA	802	6	-	Zea mays	anaerobic induction
Potri.T112300.1	ARE	AAACCA	1367	6	+	Zea mays	anaerobic induction
Potri.T112300.1	TCT-motif	TCTTAC	748	6	+	Arabidopsis thaliana	light responsive element
Potri.T112300.1	TCT-motif	TCTTAC	1792	6	-	Arabidopsis thaliana	light responsive element
Potri.T112300.1	GT1-motif	GGTTAAT	1624	7	-	Avena sativa	light responsive element
Potri.T112300.1	GT1-motif	GGTTAA	1625	6	-	Arabidopsis thaliana	light responsive element
Potri.T112300.1	GT1-motif	GGTTAAT	1713	7	+	Avena sativa	light responsive element
Potri.T112300.1	GT1-motif	GGTTAA	1950	6	-	Arabidopsis thaliana	light responsive element
Potri.T112400.1	MRE	AACCTAA	1204	7	-	Petroselinum crispum	light responsive element
Potri.T112400.1	TC-rich repeats	GTTTTCTTAC	1186	9	-	Nicotiana tabacum	defense and stress responsiveness
Potri.T112400.1	TGACG-motif	TGACG	1006	5	+	Hordeum vulgare	MeJA-responsiveness
Potri.T112400.1	TCA-element	TCAGAAGAGG	620	9	+	Brassica oleracea	light responsive element
Potri.T112400.1	TCA-element	CCATCTTTTT	1761	9	+	Nicotiana tabacum	light responsive element
Potri.T112400.1	TCA-element	CCATCTTTTT	1900	9	+	Nicotiana tabacum	light responsive element
Potri.T112400.1	I-box	cCATATCCAAT	892	10	-	Flaveria trinervia	light responsive element
Potri.T112400.1	CGTCA-motif	CGTCA	1006	5	-	Hordeum vulgare	MeJA-responsiveness
Potri.T112400.1	GC-motif	CCCCCG	1122	6	-	Zea mays	anoxic specific inducibility
Potri.T112400.1	G-Box	CACGTG	1347	6	-	Pisum sativum	light responsive element
Potri.T112400.1	G-box	TACGTG	1295	6	+	Arabidopsis thaliana	light responsive element
Potri.T112400.1	G-box	ACACGTGT	1346	8	-	Brassica napus	light responsive element
Potri.T112400.1	G-box	CACGTG	1347	6	-	Arabidopsis thaliana	light responsive element
Potri.T112400.1	ACE	GACACGTATG	1345	9	+	Petroselinum crispum	light responsive element
Potri.T112400.1	GT1-motif	GTGTGTGAA	678	9	+	Solanum tuberosum	light responsive element
Potri.T112400.1	GT1-motif	GGTTAA	1928	6	+	Arabidopsis thaliana	light responsive element
Potri.T112400.1	TCT-motif	TCTTAC	474	6	-	Arabidopsis thaliana	light responsive element
Potri.T112400.1	TCT-motif	TCTTAC	599	6	+	Arabidopsis thaliana	light responsive element
Potri.T112400.1	TCT-motif	TCTTAC	1186	6	-	Arabidopsis thaliana	light responsive element
Potri.T112400.1	ARE	AAACCA	1516	6	-	Zea mays	anaerobic induction
Potri.T112400.1	ARE	AAACCA	1858	6	-	Zea mays	anaerobic induction
Potri.T112400.1	ABRE	ACGTG	1296	5	+	Arabidopsis thaliana	abscisic acid responsiveness
Potri.T112400.1	ABRE	CGCACGTGTC	1345	9	-	Hordeum vulgare	abscisic acid responsiveness
Potri.T112400.1	ABRE	CACGTG	1347	6	-	Arabidopsis thaliana	abscisic acid responsiveness
Potri.T112400.1	ABRE	ACGTG	1348	5	+	Arabidopsis thaliana	abscisic acid responsiveness
Potri.T112400.1	TCCC-motif	TCTCCCT	1139	7	-	Spinacia oleracea	light responsive element
Potri.T112400.1	MSA-like	TCAAACGGT	1179	9	+	Catharanthus roseus	cell cycle regulation
Potri.T112400.1	TGA-element	AACGAC	1937	6	-	Brassica oleracea	auxin responsiveness
Potri.T180200.1	LTR	CCGAAA	167	6	+	Hordeum vulgare	low-temperature responsiveness
Potri.T180200.1	LTR	CCGAAA	488	6	-	Hordeum vulgare	low-temperature responsiveness
Potri.T180200.1	LTR	CCGAAA	1245	6	-	Hordeum vulgare	low-temperature responsiveness
Potri.T180200.1	TGACG-motif	TGACG	1461	5	+	Hordeum vulgare	MeJA-responsiveness
Potri.T180200.1	GA-motif	ATAGATAA	1690	8	+	Arabidopsis thaliana	light responsive element
Potri.T180200.1	CGTCA-motif	CGTCA	1461	5	-	Hordeum vulgare	MeJA-responsiveness
Potri.T180200.1	AT1-motif	AATTATTTTTTATT	1153	13	-	Solanum tuberosum	light responsive element
Potri.T180200.1	Box 4	ATTAAT	833	6	+	Petroselinum crispum	light responsive element
Potri.T180200.1	Box 4	ATTAAT	879	6	+	Petroselinum crispum	light responsive element
Potri.T180200.1	Box 4	ATTAAT	1637	6	-	Petroselinum crispum	light responsive element
Potri.T180200.1	Box 4	ATTAAT	1795	6	-	Petroselinum crispum	light responsive element
Potri.T180200.1	I-box	TAGATAACC	1691	9	+	Pisum sativum	light responsive element
Potri.T180200.1	TCA-element	TCAGAAGAGG	152	9	+	Brassica oleracea	light responsive element
Potri.T180200.1	TCA-element	CCATCTTTTT	214	9	-	Nicotiana tabacum	light responsive element
Potri.T180200.1	Sp1	GGGCGG	706	6	-	Oryza sativa	light responsive element
Potri.T180200.1	CAT-box	GCCACT	193	6	-	Arabidopsis thaliana	meristem expression
Potri.T180200.1	ARE	AAACCA	555	6	-	Zea mays	anaerobic induction
Potri.T180200.1	GT1-motif	GGTTAA	1434	6	-	Arabidopsis thaliana	light responsive element
Potri.T180200.1	GATA-motif	AAGATAAGATT	143	10	+	Arabidopsis thaliana	light responsive element
Potri.T180200.1	GATA-motif	GATAGGG	1576	7	-	Pisum sativum	light responsive element
Potri.T180200.1	G-box	TACGTG	1306	6	-	Arabidopsis thaliana	light responsive element
Potri.T180200.1	ACE	CTAACGTATT	1119	9	-	Petroselinum crispum	light responsive element
Potri.T180200.1	TGA-element	AACGAC	1274	6	-	Brassica oleracea	auxin responsiveness
Potri.T180200.1	circadian	CAAAGATATC	1963	9	+	Lycopersicon esculentum	circadian control
Potri.T180200.1	ABRE	ACGTG	1306	5	-	Arabidopsis thaliana	abscisic acid responsiveness

## Sheet: Sheet2
Potri.001G071000.1	3-AF1 binding site	TAAGAGAGGAA	1162	10	-	Solanum tuberosum	light responsive element
Potri.001G071000.1	TGACG-motif	TGACG	1230	5	+	Hordeum vulgare	MeJA-responsiveness
Potri.001G071000.1	TGACG-motif	TGACG	1262	5	-	Hordeum vulgare	MeJA-responsiveness
Potri.001G071000.1	AE-box	AGAAACAA	58	8	-	Arabidopsis thaliana	light responsive element
Potri.001G071000.1	MRE	AACCTAA	552	7	+	Petroselinum crispum	light responsive element
Potri.001G071000.1	AuxRR-core	GGTCCAT	15	7	-	Nicotiana tabacum	auxin responsiveness
Potri.001G071000.1	CGTCA-motif	CGTCA	1230	5	-	Hordeum vulgare	MeJA-responsiveness
Potri.001G071000.1	CGTCA-motif	CGTCA	1262	5	+	Hordeum vulgare	MeJA-responsiveness
Potri.001G071000.1	I-box	AGATAAGG	1144	8	+	Triticum aestivum	light responsive element
Potri.001G071000.1	P-box	CCTTTTG	42	7	+	Oryza sativa	gibberellin-responsive element
Potri.001G071000.1	P-box	CCTTTTG	440	7	-	Oryza sativa	gibberellin-responsive element
Potri.001G071000.1	P-box	CCTTTTG	1123	7	-	Oryza sativa	gibberellin-responsive element
Potri.001G071000.1	GT1-motif	GGTTAA	531	6	+	Arabidopsis thaliana	light responsive element
Potri.001G071000.1	ARE	AAACCA	289	6	+	Zea mays	anaerobic induction
Potri.001G071000.1	ARE	AAACCA	1353	6	+	Zea mays	anaerobic induction
Potri.001G071000.1	ARE	AAACCA	1792	6	+	Zea mays	anaerobic induction
Potri.001G071000.1	TCT-motif	TCTTAC	463	6	-	Arabidopsis thaliana	light responsive element
Potri.001G071000.1	TCT-motif	TCTTAC	975	6	-	Arabidopsis thaliana	light responsive element
Potri.001G071000.1	MBS	CAACTG	352	6	-	Arabidopsis thaliana	drought-inducibility
Potri.001G071000.1	GC-motif	CCCCCG	128	6	-	Zea mays	anoxic specific inducibility
Potri.001G071000.1	GC-motif	CCCCCG	1752	6	+	Zea mays	anoxic specific inducibility
Potri.001G071000.1	G-Box	CACGTT	100	6	+	Pisum sativum	light responsive element
Potri.001G071000.1	circadian	CAAAGATATC	1391	9	-	Lycopersicon esculentum	circadian control
Potri.001G071000.1	WUN-motif	AAATTTCCT	1431	9	-	Brassica oleracea	wound-responsive element
Potri.001G071000.1	TGA-element	AACGAC	176	6	+	Brassica oleracea	auxin responsiveness
Potri.001G071000.1	ABRE	ACGTG	100	5	-	Arabidopsis thaliana	abscisic acid responsiveness
Potri.001G136100.1	GA-motif	ATAGATAA	756	8	+	Arabidopsis thaliana	light responsive element
Potri.001G136100.1	GA-motif	ATAGATAA	1510	8	-	Arabidopsis thaliana	light responsive element
Potri.001G136100.1	TGACG-motif	TGACG	1777	5	-	Hordeum vulgare	MeJA-responsiveness
Potri.001G136100.1	AE-box	AGAAACTT	782	8	+	Arabidopsis thaliana	light responsive element
Potri.001G136100.1	MRE	AACCTAA	1212	7	+	Petroselinum crispum	light responsive element
Potri.001G136100.1	MRE	AACCTAA	1640	7	-	Petroselinum crispum	light responsive element
Potri.001G136100.1	CGTCA-motif	CGTCA	1777	5	+	Hordeum vulgare	MeJA-responsiveness
Potri.001G136100.1	P-box	CCTTTTG	1281	7	-	Oryza sativa	gibberellin-responsive element
Potri.001G136100.1	Box 4	ATTAAT	125	6	+	Petroselinum crispum	light responsive element
Potri.001G136100.1	Box 4	ATTAAT	739	6	+	Petroselinum crispum	light responsive element
Potri.001G136100.1	Box 4	ATTAAT	894	6	+	Petroselinum crispum	light responsive element
Potri.001G136100.1	Box 4	ATTAAT	1064	6	-	Petroselinum crispum	light responsive element
Potri.001G136100.1	Box 4	ATTAAT	1681	6	-	Petroselinum crispum	light responsive element
Potri.001G136100.1	TCT-motif	TCTTAC	206	6	-	Arabidopsis thaliana	light responsive element
Potri.001G136100.1	ARE	AAACCA	140	6	-	Zea mays	anaerobic induction
Potri.001G136100.1	ARE	AAACCA	429	6	+	Zea mays	anaerobic induction
Potri.001G136100.1	ARE	AAACCA	911	6	-	Zea mays	anaerobic induction
Potri.001G136100.1	GT1-motif	GGTTAA	1377	6	+	Arabidopsis thaliana	light responsive element
Potri.001G136100.1	CAT-box	GCCACT	1766	6	-	Arabidopsis thaliana	meristem expression
Potri.001G136100.1	LAMP-element	CTTTATCA	1095	8	-	Pisum sativum	light responsive element
Potri.001G136100.1	MBS	CAACTG	1650	6	+	Arabidopsis thaliana	drought-inducibility
Potri.001G136100.1	G-Box	CACGTT	298	6	-	Pisum sativum	light responsive element
Potri.001G136100.1	GATA-motif	AAGGATAAGG	167	9	+	Solanum tuberosum	light responsive element
Potri.001G136100.1	GATA-motif	GATAGGA	412	7	-	Arabidopsis thaliana	light responsive element
Potri.001G136100.1	GATA-motif	GATAGGG	1883	7	-	Pisum sativum	light responsive element
Potri.001G136100.1	GATA-motif	AAGGATAAGG	1890	9	-	Solanum tuberosum	light responsive element
Potri.001G136100.1	TGA-element	AACGAC	68	6	+	Brassica oleracea	auxin responsiveness
Potri.001G136100.1	TGA-element	AACGAC	273	6	+	Brassica oleracea	auxin responsiveness
Potri.001G136100.1	TGA-element	AACGAC	1827	6	+	Brassica oleracea	auxin responsiveness
Potri.001G136100.1	TCCC-motif	TCTCCCT	1880	7	+	Spinacia oleracea	light responsive element
Potri.001G136100.1	ABRE	ACGTG	299	5	+	Arabidopsis thaliana	abscisic acid responsiveness
Potri.002G060400.1	RY-element	CATGCATG	115	8	+	Helianthus annuus	seed-specific regulation
Potri.002G060400.1	LTR	CCGAAA	206	6	-	Hordeum vulgare	low-temperature responsiveness
Potri.002G060400.1	Box 4	ATTAAT	198	6	+	Petroselinum crispum	light responsive element
Potri.002G060400.1	Box 4	ATTAAT	225	6	+	Petroselinum crispum	light responsive element
Potri.002G060400.1	Box 4	ATTAAT	233	6	+	Petroselinum crispum	light responsive element
Potri.002G060400.1	Box 4	ATTAAT	442	6	+	Petroselinum crispum	light responsive element
Potri.002G060400.1	Box 4	ATTAAT	811	6	+	Petroselinum crispum	light responsive element
Potri.002G060400.1	Box 4	ATTAAT	999	6	-	Petroselinum crispum	light responsive element
Potri.002G060400.1	Box 4	ATTAAT	1081	6	-	Petroselinum crispum	light responsive element
Potri.002G060400.1	Box 4	ATTAAT	1111	6	-	Petroselinum crispum	light responsive element
Potri.002G060400.1	Box 4	ATTAAT	1134	6	-	Petroselinum crispum	light responsive element
Potri.002G060400.1	Box 4	ATTAAT	1796	6	-	Petroselinum crispum	light responsive element
Potri.002G060400.1	P-box	CCTTTTG	1743	7	-	Oryza sativa	gibberellin-responsive element
Potri.002G060400.1	P-box	CCTTTTG	1890	7	-	Oryza sativa	gibberellin-responsive element
Potri.002G060400.1	I-box	AGATAAGG	1529	8	+	Triticum aestivum	light responsive element
Potri.002G060400.1	O2-site	GATGACATGG	723	9	+	Zea mays	zein metabolism regulation
Potri.002G060400.1	GATA-motif	AAGATAAGATT	892	10	-	Arabidopsis thaliana	light responsive element
Potri.002G060400.1	GATA-motif	AAGATAAGATT	973	10	+	Arabidopsis thaliana	light responsive element
Potri.002G060400.1	GATA-motif	AAGATAAGATT	1122	10	+	Arabidopsis thaliana	light responsive element
Potri.002G060400.1	GATA-motif	AAGGATAAGG	1959	9	-	Solanum tuberosum	light responsive element
Potri.002G060400.1	GATA-motif	GATAGGG	1980	7	-	Pisum sativum	light responsive element
Potri.002G060400.1	MBS	CAACTG	1623	6	+	Arabidopsis thaliana	drought-inducibility
Potri.002G060400.1	CAT-box	GCCACT	638	6	+	Arabidopsis thaliana	meristem expression
Potri.002G060400.1	TCT-motif	TCTTAC	267	6	+	Arabidopsis thaliana	light responsive element
Potri.002G060400.1	ARE	AAACCA	1330	6	+	Zea mays	anaerobic induction
Potri.002G060400.1	ARE	AAACCA	1472	6	+	Zea mays	anaerobic induction
Potri.002G060400.1	ARE	AAACCA	1538	6	+	Zea mays	anaerobic induction
Potri.002G060400.1	ARE	AAACCA	1683	6	-	Zea mays	anaerobic induction
Potri.002G060400.1	TCCC-motif	TCTCCCT	1786	7	+	Spinacia oleracea	light responsive element
Potri.002G060400.1	TCCC-motif	TCTCCCT	1977	7	+	Spinacia oleracea	light responsive element
Potri.002G060500.1	circadian	CAAAGATATC	420	9	-	Lycopersicon esculentum	circadian control
Potri.002G060500.1	ABRE	ACGTG	1511	5	-	Arabidopsis thaliana	abscisic acid responsiveness
Potri.002G060500.1	ARE	AAACCA	118	6	-	Zea mays	anaerobic induction
Potri.002G060500.1	ARE	AAACCA	201	6	-	Zea mays	anaerobic induction
Potri.002G060500.1	TCT-motif	TCTTAC	510	6	+	Arabidopsis thaliana	light responsive element
Potri.002G060500.1	GT1-motif	GGTTAAT	803	7	-	Avena sativa	light responsive element
Potri.002G060500.1	GT1-motif	GGTTAA	804	6	-	Arabidopsis thaliana	light responsive element
Potri.002G060500.1	MBS	CAACTG	326	6	-	Arabidopsis thaliana	drought-inducibility
Potri.002G060500.1	MBS	CAACTG	1493	6	-	Arabidopsis thaliana	drought-inducibility
Potri.002G060500.1	CAT-box	GCCACT	247	6	+	Arabidopsis thaliana	meristem expression
Potri.002G060500.1	CAT-box	GCCACT	1530	6	+	Arabidopsis thaliana	meristem expression
Potri.002G060500.1	G-box	CACGTC	1511	6	+	Zea mays	light responsive element
Potri.002G060500.1	AT1-motif	AATTATTTTTTATT	1169	13	+	Solanum tuberosum	light responsive element
Potri.002G060500.1	ATCT-motif	AATCTAATCC	951	9	-	Pisum sativum	light responsive element
Potri.002G060500.1	LTR	CCGAAA	1658	6	-	Hordeum vulgare	low-temperature responsiveness
Potri.002G153200.1	ABRE	GCAACGTGTC	1017	9	-	Hordeum vulgare	abscisic acid responsiveness
Potri.002G153200.1	ABRE	ACGTG	1019	5	-	Arabidopsis thaliana	abscisic acid responsiveness
Potri.002G153200.1	ABRE	CACGTG	1076	6	-	Arabidopsis thaliana	abscisic acid responsiveness
Potri.002G153200.1	ABRE	ACGTG	1077	5	+	Arabidopsis thaliana	abscisic acid responsiveness
Potri.002G153200.1	circadian	CAAAGATATC	25	9	+	Lycopersicon esculentum	circadian control
Potri.002G153200.1	G-Box	CACGTT	1019	6	+	Pisum sativum	light responsive element
Potri.002G153200.1	G-Box	CACGTG	1076	6	-	Pisum sativum	light responsive element
Potri.002G153200.1	G-box	ACACGTG(G/t)CACC	1018	10.5	+	Lycopersicon esculentum	light responsive element
Potri.002G153200.1	G-box	CACGTG	1076	6	-	Arabidopsis thaliana	light responsive element
Potri.002G153200.1	G-box	TAACACGTAG	1966	9	+	Brassica oleracea	light responsive element
Potri.002G153200.1	GATA-motif	AAGGATAAGG	776	9	+	Solanum tuberosum	light responsive element
Potri.002G153200.1	ARE	AAACCA	427	6	+	Zea mays	anaerobic induction
Potri.002G153200.1	ARE	AAACCA	733	6	+	Zea mays	anaerobic induction
Potri.002G153200.1	ARE	AAACCA	1212	6	+	Zea mays	anaerobic induction
Potri.002G153200.1	GT1-motif	GGTTAA	317	6	+	Arabidopsis thaliana	light responsive element
Potri.002G153200.1	GT1-motif	GGTTAA	1694	6	-	Arabidopsis thaliana	light responsive element
Potri.002G153200.1	GT1-motif	GGTTAA	1943	6	-	Arabidopsis thaliana	light responsive element
Potri.002G153200.1	Sp1	GGGCGG	261	6	+	Oryza sativa	light responsive element
Potri.002G153200.1	P-box	CCTTTTG	220	7	-	Oryza sativa	gibberellin-responsive element
Potri.002G153200.1	Box 4	ATTAAT	244	6	+	Petroselinum crispum	light responsive element
Potri.002G153200.1	Box 4	ATTAAT	1172	6	-	Petroselinum crispum	light responsive element
Potri.002G153200.1	Box 4	ATTAAT	1176	6	-	Petroselinum crispum	light responsive element
Potri.002G153200.1	Box 4	ATTAAT	1951	6	-	Petroselinum crispum	light responsive element
Potri.002G153200.1	AT1-motif	AATTATTTTTTATT	274	13	-	Solanum tuberosum	light responsive element
Potri.002G153200.1	CGTCA-motif	CGTCA	1127	5	+	Hordeum vulgare	MeJA-responsiveness
Potri.002G153200.1	TGACG-motif	TGACG	1127	5	-	Hordeum vulgare	MeJA-responsiveness
Potri.002G153200.1	AAAC-motif	CAATCAAAACCT	1848	11	+	Spinacia oleracea	light responsive element
Potri.002G236200.1	AT1-motif	AATTATTTTTTATT	1052	13	-	Solanum tuberosum	light responsive element
Potri.002G236200.1	Box 4	ATTAAT	271	6	+	Petroselinum crispum	light responsive element
Potri.002G236200.1	Box 4	ATTAAT	509	6	+	Petroselinum crispum	light responsive element
Potri.002G236200.1	Box 4	ATTAAT	1146	6	-	Petroselinum crispum	light responsive element
Potri.002G236200.1	Box 4	ATTAAT	1463	6	-	Petroselinum crispum	light responsive element
Potri.002G236200.1	Box 4	ATTAAT	1584	6	-	Petroselinum crispum	light responsive element
Potri.002G236200.1	I-box	atGATAAGGTC	56	10	+	Helianthus annuus	light responsive element
Potri.002G236200.1	TC-rich repeats	GTTTTCTTAC	1428	9	-	Nicotiana tabacum	defense and stress responsiveness
Potri.002G236200.1	AE-box	AGAAACTT	125	8	+	Arabidopsis thaliana	light responsive element
Potri.002G236200.1	MSA-like	TCAAACGGT	711	9	+	Catharanthus roseus	cell cycle regulation
Potri.002G236200.1	ACA-motif	AATCACAACCATA	935	12	+	Arabidopsis thaliana	light responsive element
Potri.002G236200.1	ABRE	ACGTG	818	5	+	Arabidopsis thaliana	abscisic acid responsiveness
Potri.002G236200.1	ABRE	ACGTG	1250	5	+	Arabidopsis thaliana	abscisic acid responsiveness
Potri.002G236200.1	TCCC-motif	TCTCCCT	1968	7	+	Spinacia oleracea	light responsive element
Potri.002G236200.1	MBS	CAACTG	877	6	+	Arabidopsis thaliana	drought-inducibility
Potri.002G236200.1	ARE	AAACCA	1400	6	+	Zea mays	anaerobic induction
Potri.002G236200.1	GATA-motif	GATAGGG	1910	7	-	Pisum sativum	light responsive element
Potri.002G236200.1	G-box	TACGTG	817	6	+	Arabidopsis thaliana	light responsive element
Potri.002G236200.1	ACE	CTAACGTATT	1515	9	-	Petroselinum crispum	light responsive element
Potri.002G236200.1	G-Box	CACGTT	1249	6	-	Pisum sativum	light responsive element
Potri.002G244200.1	GA-motif	ATAGATAA	331	8	-	Arabidopsis thaliana	light responsive element
Potri.002G244200.1	GA-motif	ATAGATAA	863	8	-	Arabidopsis thaliana	light responsive element
Potri.002G244200.1	chs-CMA1a	TTACTTAA	1491	8	+	Daucus carota	light responsive element
Potri.002G244200.1	TCA-element	CCATCTTTTT	65	9	+	Nicotiana tabacum	light responsive element
Potri.002G244200.1	TCA-element	CCATCTTTTT	1516	9	-	Nicotiana tabacum	light responsive element
Potri.002G244200.1	Box 4	ATTAAT	1137	6	-	Petroselinum crispum	light responsive element
Potri.002G244200.1	Box 4	ATTAAT	1415	6	-	Petroselinum crispum	light responsive element
Potri.002G244200.1	Box 4	ATTAAT	1719	6	-	Petroselinum crispum	light responsive element
Potri.002G244200.1	TCT-motif	TCTTAC	1324	6	-	Arabidopsis thaliana	light responsive element
Potri.002G244200.1	GT1-motif	GGTTAA	1185	6	+	Arabidopsis thaliana	light responsive element
Potri.002G244200.1	MBS	CAACTG	674	6	-	Arabidopsis thaliana	drought-inducibility
Potri.002G244200.1	ACE	GACACGTATG	1919	9	-	Petroselinum crispum	light responsive element
Potri.002G244200.1	G-box	TACGTG	686	6	+	Arabidopsis thaliana	light responsive element
Potri.002G244200.1	G-box	TACGTG	1921	6	+	Arabidopsis thaliana	light responsive element
Potri.002G244200.1	GATA-motif	GATAGGG	1521	7	+	Pisum sativum	light responsive element
Potri.002G244200.1	ABRE	ACGTG	687	5	+	Arabidopsis thaliana	abscisic acid responsiveness
Potri.002G244200.1	ABRE	ACGTG	1922	5	+	Arabidopsis thaliana	abscisic acid responsiveness
Potri.002G244200.1	MSA-like	(T/C)C(T/C)AACGG(T/C)(T/C)A	1179	9	+	Catharanthus roseus	cell cycle regulation
Potri.003G097300.1	Box 4	ATTAAT	400	6	+	Petroselinum crispum	light responsive element
Potri.003G097300.1	Box 4	ATTAAT	1491	6	-	Petroselinum crispum	light responsive element
Potri.003G097300.1	CGTCA-motif	CGTCA	1006	5	-	Hordeum vulgare	MeJA-responsiveness
Potri.003G097300.1	AT1-motif	AATTATTTTTTATT	1410	13	-	Solanum tuberosum	light responsive element
Potri.003G097300.1	MRE	AACCTAA	1983	7	-	Petroselinum crispum	light responsive element
Potri.003G097300.1	TGACG-motif	TGACG	1006	5	+	Hordeum vulgare	MeJA-responsiveness
Potri.003G097300.1	TATC-box	TATCCCA	1747	7	+	Oryza sativa	gibberellin-responsive element
Potri.003G097300.1	GATA-motif	GATAGGA	450	7	-	Arabidopsis thaliana	light responsive element
Potri.003G097300.1	GATA-motif	GATAGGA	699	7	+	Arabidopsis thaliana	light responsive element
Potri.003G097300.1	GATA-motif	AAGGATAAGG	1878	9	-	Solanum tuberosum	light responsive element
Potri.003G097300.1	GATA-motif	AAGGATAAGG	1941	9	+	Solanum tuberosum	light responsive element
Potri.003G097300.1	G-box	CTTCCACGTGGCA	1226	12	-	Arabidopsis thaliana	light responsive element
Potri.003G097300.1	G-box	GCCACGTGGA	1227	9	+	Arabidopsis thaliana	light responsive element
Potri.003G097300.1	G-Box	TCCACATGGCA	1226	11	-	Triticum aestivum	light responsive element
Potri.003G097300.1	CAT-box	GCCACT	1159	6	+	Arabidopsis thaliana	meristem expression
Potri.003G097300.1	ARE	AAACCA	374	6	-	Zea mays	anaerobic induction
Potri.003G097300.1	ARE	AAACCA	951	6	+	Zea mays	anaerobic induction
Potri.003G097300.1	ARE	AAACCA	1685	6	+	Zea mays	anaerobic induction
Potri.003G097300.1	GT1-motif	GGTTAA	1839	6	-	Arabidopsis thaliana	light responsive element
Potri.003G097300.1	GT1-motif	GGTTAA	1986	6	+	Arabidopsis thaliana	light responsive element
Potri.003G159700.1	G-box	TACGTG	1329	6	+	Arabidopsis thaliana	light responsive element
Potri.003G159700.1	G-Box	CACGTT	1477	6	-	Pisum sativum	light responsive element
Potri.003G159700.1	MBS	CAACTG	251	6	+	Arabidopsis thaliana	drought-inducibility
Potri.003G159700.1	CAT-box	GCCACT	1247	6	-	Arabidopsis thaliana	meristem expression
Potri.003G159700.1	ARE	AAACCA	607	6	+	Zea mays	anaerobic induction
Potri.003G159700.1	ARE	AAACCA	1737	6	-	Zea mays	anaerobic induction
Potri.003G159700.1	GT1-motif	GGTTAA	258	6	+	Arabidopsis thaliana	light responsive element
Potri.003G159700.1	GT1-motif	GGTTAA	260	6	-	Arabidopsis thaliana	light responsive element
Potri.003G159700.1	GT1-motif	GGTTAA	1280	6	+	Arabidopsis thaliana	light responsive element
Potri.003G159700.1	GT1-motif	GGTTAAT	1363	7	-	Avena sativa	light responsive element
Potri.003G159700.1	GT1-motif	GGTTAA	1364	6	-	Arabidopsis thaliana	light responsive element
Potri.003G159700.1	ABRE	AACCCGG	476	7	+	Arabidopsis thaliana	abscisic acid responsiveness
Potri.003G159700.1	ABRE	TACGTGTC	1329	8	+	Oryza sativa	abscisic acid responsiveness
Potri.003G159700.1	ABRE	ACGTG	1330	5	+	Arabidopsis thaliana	abscisic acid responsiveness
Potri.003G159700.1	ABRE	ACGTG	1478	5	+	Arabidopsis thaliana	abscisic acid responsiveness
Potri.003G159700.1	circadian	CAAAGATATC	1082	9	+	Lycopersicon esculentum	circadian control
Potri.003G159700.1	TGACG-motif	TGACG	1949	5	+	Hordeum vulgare	MeJA-responsiveness
Potri.003G159700.1	LTR	CCGAAA	923	6	-	Hordeum vulgare	low-temperature responsiveness
Potri.003G159700.1	Box 4	ATTAAT	483	6	+	Petroselinum crispum	light responsive element
Potri.003G159700.1	Box 4	ATTAAT	777	6	+	Petroselinum crispum	light responsive element
Potri.003G159700.1	Box 4	ATTAAT	1587	6	-	Petroselinum crispum	light responsive element
Potri.003G159700.1	Box 4	ATTAAT	1622	6	-	Petroselinum crispum	light responsive element
Potri.003G159700.1	Box 4	ATTAAT	1643	6	-	Petroselinum crispum	light responsive element
Potri.003G159700.1	Box 4	ATTAAT	1680	6	-	Petroselinum crispum	light responsive element
Potri.003G159700.1	CGTCA-motif	CGTCA	1949	5	-	Hordeum vulgare	MeJA-responsiveness
Potri.003G159700.1	Gap-box	CAAATGAA(A/G)A	1751	9.5	+	Arabidopsis thaliana	light responsive element
Potri.003G159700.1	AT1-motif	AATTATTTTTTATT	636	13	-	Solanum tuberosum	light responsive element
Potri.003G159700.1	O2-site	GTTGACGTGA	469	9	-	Zea mays	zein metabolism regulation
Potri.004G021000.1	ARE	AAACCA	1843	6	-	Zea mays	anaerobic induction
Potri.004G021000.1	GT1-motif	GGTTAA	247	6	+	Arabidopsis thaliana	light responsive element
Potri.004G021000.1	GT1-motif	GGTTAA	407	6	+	Arabidopsis thaliana	light responsive element
Potri.004G021000.1	GT1-motif	GGTTAA	409	6	-	Arabidopsis thaliana	light responsive element
Potri.004G021000.1	GT1-motif	GGTTAA	1549	6	-	Arabidopsis thaliana	light responsive element
Potri.004G021000.1	CAT-box	GCCACT	1253	6	+	Arabidopsis thaliana	meristem expression
Potri.004G021000.1	MBS	CAACTG	1070	6	-	Arabidopsis thaliana	drought-inducibility
Potri.004G021000.1	ACE	CTAACGTATT	920	9	-	Petroselinum crispum	light responsive element
Potri.004G021000.1	G-box	CCACGTAA	1674	8	+	Brassica napus	light responsive element
Potri.004G021000.1	G-box	TACGTG	1675	6	-	Arabidopsis thaliana	light responsive element
Potri.004G021000.1	ABRE	ACGTG	1675	5	-	Arabidopsis thaliana	abscisic acid responsiveness
Potri.004G021000.1	LS7	CAGATTTATTTTTA	120	13	+	Zea mays	light responsive element
Potri.004G021000.1	ATCT-motif	AATCTAATCC	1699	9	-	Pisum sativum	light responsive element
Potri.004G021000.1	MRE	AACCTAA	1551	7	+	Petroselinum crispum	light responsive element
Potri.004G021000.1	MRE	AACCTAA	1702	7	-	Petroselinum crispum	light responsive element
Potri.004G021000.1	AuxRR-core	GGTCCAT	1132	7	-	Nicotiana tabacum	auxin responsiveness
Potri.004G021000.1	P-box	CCTTTTG	1033	7	+	Oryza sativa	gibberellin-responsive element
Potri.004G021000.1	Box 4	ATTAAT	63	6	+	Petroselinum crispum	light responsive element
Potri.004G021000.1	Box 4	ATTAAT	263	6	+	Petroselinum crispum	light responsive element
Potri.004G021000.1	Box 4	ATTAAT	936	6	+	Petroselinum crispum	light responsive element
Potri.004G021000.1	Box 4	ATTAAT	1538	6	-	Petroselinum crispum	light responsive element
Potri.004G021000.1	Box 4	ATTAAT	1668	6	-	Petroselinum crispum	light responsive element
Potri.004G021000.1	Box 4	ATTAAT	1726	6	-	Petroselinum crispum	light responsive element
Potri.005G007200.1	TCCC-motif	TCTCCCT	439	7	+	Spinacia oleracea	light responsive element
Potri.005G007200.1	MBS	CAACTG	1767	6	+	Arabidopsis thaliana	drought-inducibility
Potri.005G007200.1	GT1-motif	GGTTAA	1179	6	-	Arabidopsis thaliana	light responsive element
Potri.005G007200.1	TCT-motif	TCTTAC	1133	6	-	Arabidopsis thaliana	light responsive element
Potri.005G007200.1	TCT-motif	TCTTAC	1579	6	-	Arabidopsis thaliana	light responsive element
Potri.005G007200.1	ARE	AAACCA	872	6	+	Zea mays	anaerobic induction
Potri.005G007200.1	ARE	AAACCA	970	6	+	Zea mays	anaerobic induction
Potri.005G007200.1	ARE	AAACCA	1270	6	+	Zea mays	anaerobic induction
Potri.005G007200.1	ARE	AAACCA	1644	6	+	Zea mays	anaerobic induction
Potri.005G007200.1	ARE	AAACCA	1654	6	+	Zea mays	anaerobic induction
Potri.005G007200.1	TCA-element	CCATCTTTTT	207	9	+	Nicotiana tabacum	light responsive element
Potri.005G007200.1	TCA-element	CCATCTTTTT	1671	9	+	Nicotiana tabacum	light responsive element
Potri.005G007200.1	Box 4	ATTAAT	31	6	+	Petroselinum crispum	light responsive element
Potri.005G007200.1	Box 4	ATTAAT	236	6	+	Petroselinum crispum	light responsive element
Potri.005G007200.1	Box 4	ATTAAT	532	6	+	Petroselinum crispum	light responsive element
Potri.005G007200.1	Box 4	ATTAAT	536	6	+	Petroselinum crispum	light responsive element
Potri.005G007200.1	Box 4	ATTAAT	940	6	+	Petroselinum crispum	light responsive element
Potri.005G007200.1	Box 4	ATTAAT	1663	6	-	Petroselinum crispum	light responsive element
Potri.005G007200.1	TC-rich repeats	GTTTTCTTAC	1579	9	-	Nicotiana tabacum	defense and stress responsiveness
Potri.005G007200.1	GA-motif	ATAGATAA	916	8	-	Arabidopsis thaliana	light responsive element
Potri.005G201200.1	G-Box	CACGTT	1031	6	+	Pisum sativum	light responsive element
Potri.005G201200.1	G-box	CACGTC	337	6	-	Zea mays	light responsive element
Potri.005G201200.1	G-box	CACGTC	1552	6	+	Zea mays	light responsive element
Potri.005G201200.1	GATA-motif	AAGATAAGATT	811	10	-	Arabidopsis thaliana	light responsive element
Potri.005G201200.1	GT1-motif	GGTTAA	837	6	+	Arabidopsis thaliana	light responsive element
Potri.005G201200.1	GT1-motif	GGTTAA	1345	6	-	Arabidopsis thaliana	light responsive element
Potri.005G201200.1	ARE	AAACCA	1584	6	+	Zea mays	anaerobic induction
Potri.005G201200.1	CAT-box	GCCACT	1571	6	+	Arabidopsis thaliana	meristem expression
Potri.005G201200.1	MBS	CAACTG	19	6	-	Arabidopsis thaliana	drought-inducibility
Potri.005G201200.1	MBS	CAACTG	1617	6	-	Arabidopsis thaliana	drought-inducibility
Potri.005G201200.1	ABRE	ACGTG	338	5	+	Arabidopsis thaliana	abscisic acid responsiveness
Potri.005G201200.1	ABRE	ACGTG	1031	5	-	Arabidopsis thaliana	abscisic acid responsiveness
Potri.005G201200.1	ABRE	ACGTG	1552	5	-	Arabidopsis thaliana	abscisic acid responsiveness
Potri.005G201200.1	MRE	AACCTAA	242	7	-	Petroselinum crispum	light responsive element
Potri.005G201200.1	ATCT-motif	AATCTAATCC	521	9	+	Pisum sativum	light responsive element
Potri.005G201200.1	TGACG-motif	TGACG	81	5	+	Hordeum vulgare	MeJA-responsiveness
Potri.005G201200.1	P-box	CCTTTTG	625	7	-	Oryza sativa	gibberellin-responsive element
Potri.005G201200.1	I-box	atGATAAGGTC	441	10	+	Helianthus annuus	light responsive element
Potri.005G201200.1	I-box	AGATAAGG	1980	8	-	Triticum aestivum	light responsive element
Potri.005G201200.1	Box 4	ATTAAT	417	6	+	Petroselinum crispum	light responsive element
Potri.005G201200.1	chs-CMA2a	TCACTTGA	1527	8	-	Petroselinum crispum	light responsive element
Potri.005G201200.1	CGTCA-motif	CGTCA	81	5	-	Hordeum vulgare	MeJA-responsiveness
Potri.006G071200.1	ABRE	ACGTG	695	5	-	Arabidopsis thaliana	abscisic acid responsiveness
Potri.006G071200.1	ABRE	ACGTG	1014	5	-	Arabidopsis thaliana	abscisic acid responsiveness
Potri.006G071200.1	TCCC-motif	TCTCCCT	918	7	-	Spinacia oleracea	light responsive element
Potri.006G071200.1	GT1-motif	GGTTAA	218	6	+	Arabidopsis thaliana	light responsive element
Potri.006G071200.1	GT1-motif	GGTTAA	220	6	-	Arabidopsis thaliana	light responsive element
Potri.006G071200.1	GT1-motif	GGTTAAT	1008	7	-	Avena sativa	light responsive element
Potri.006G071200.1	GT1-motif	GGTTAA	1009	6	-	Arabidopsis thaliana	light responsive element
Potri.006G071200.1	GT1-motif	GGTTAAT	1284	7	+	Avena sativa	light responsive element
Potri.006G071200.1	TCT-motif	TCTTAC	451	6	+	Arabidopsis thaliana	light responsive element
Potri.006G071200.1	Sp1	GGGCGG	1083	6	-	Oryza sativa	light responsive element
Potri.006G071200.1	MBS	CAACTG	1268	6	-	Arabidopsis thaliana	drought-inducibility
Potri.006G071200.1	G-box	CACGTC	695	6	+	Zea mays	light responsive element
Potri.006G071200.1	G-box	CACGTC	1014	6	+	Zea mays	light responsive element
Potri.006G071200.1	O2-site	GATGATGTGG	694	9	-	Zea mays	zein metabolism regulation
Potri.006G071200.1	CGTCA-motif	CGTCA	208	5	+	Hordeum vulgare	MeJA-responsiveness
Potri.006G071200.1	CGTCA-motif	CGTCA	697	5	+	Hordeum vulgare	MeJA-responsiveness
Potri.006G071200.1	CGTCA-motif	CGTCA	1759	5	+	Hordeum vulgare	MeJA-responsiveness
Potri.006G071200.1	AT1-motif	AATTATTTTTTATT	676	13	+	Solanum tuberosum	light responsive element
Potri.006G071200.1	AT1-motif	AATTATTTTTTATT	961	13	-	Solanum tuberosum	light responsive element
Potri.006G071200.1	Box 4	ATTAAT	164	6	+	Petroselinum crispum	light responsive element
Potri.006G071200.1	Box 4	ATTAAT	503	6	+	Petroselinum crispum	light responsive element
Potri.006G071200.1	Box 4	ATTAAT	943	6	+	Petroselinum crispum	light responsive element
Potri.006G071200.1	Box 4	ATTAAT	996	6	+	Petroselinum crispum	light responsive element
Potri.006G071200.1	Box 4	ATTAAT	1459	6	-	Petroselinum crispum	light responsive element
Potri.006G071200.1	Box 4	ATTAAT	1745	6	-	Petroselinum crispum	light responsive element
Potri.006G071200.1	ATCT-motif	AATCTAATCC	1398	9	+	Pisum sativum	light responsive element
Potri.006G071200.1	TGACG-motif	TGACG	208	5	-	Hordeum vulgare	MeJA-responsiveness
Potri.006G071200.1	TGACG-motif	TGACG	697	5	-	Hordeum vulgare	MeJA-responsiveness
Potri.006G071200.1	TGACG-motif	TGACG	1759	5	-	Hordeum vulgare	MeJA-responsiveness
Potri.006G071200.1	LTR	CCGAAA	1805	6	-	Hordeum vulgare	low-temperature responsiveness
Potri.006G122900.1	G-Box	CACGTT	165	6	+	Pisum sativum	light responsive element
Potri.006G122900.1	GATA-motif	GATAGGG	1333	7	-	Pisum sativum	light responsive element
Potri.006G122900.1	TCT-motif	TCTTAC	902	6	-	Arabidopsis thaliana	light responsive element
Potri.006G122900.1	TCT-motif	TCTTAC	1644	6	+	Arabidopsis thaliana	light responsive element
Potri.006G122900.1	ARE	AAACCA	1652	6	-	Zea mays	anaerobic induction
Potri.006G122900.1	ARE	AAACCA	1767	6	+	Zea mays	anaerobic induction
Potri.006G122900.1	GT1-motif	GGTTAA	38	6	+	Arabidopsis thaliana	light responsive element
Potri.006G122900.1	GT1-motif	GGTTAAT	140	7	-	Avena sativa	light responsive element
Potri.006G122900.1	GT1-motif	GGTTAA	141	6	-	Arabidopsis thaliana	light responsive element
Potri.006G122900.1	GT1-motif	GGTTAA	159	6	+	Arabidopsis thaliana	light responsive element
Potri.006G122900.1	GT1-motif	GGTTAA	682	6	+	Arabidopsis thaliana	light responsive element
Potri.006G122900.1	MBS	CAACTG	675	6	-	Arabidopsis thaliana	drought-inducibility
Potri.006G122900.1	MBS	CAACTG	1722	6	+	Arabidopsis thaliana	drought-inducibility
Potri.006G122900.1	MBS	CAACTG	1890	6	+	Arabidopsis thaliana	drought-inducibility
Potri.006G122900.1	ABRE	ACGTG	165	5	-	Arabidopsis thaliana	abscisic acid responsiveness
Potri.006G122900.1	TC-rich repeats	GTTTTCTTAC	1448	9	-	Nicotiana tabacum	defense and stress responsiveness
Potri.006G122900.1	ATCT-motif	AATCTAATCC	15	9	+	Pisum sativum	light responsive element
Potri.006G122900.1	ATCT-motif	AATCTAATCC	1437	9	-	Pisum sativum	light responsive element
Potri.006G122900.1	TGACG-motif	TGACG	1565	5	-	Hordeum vulgare	MeJA-responsiveness
Potri.006G122900.1	TCA-element	CCATCTTTTT	1102	9	-	Nicotiana tabacum	light responsive element
Potri.006G122900.1	Box 4	ATTAAT	57	6	+	Petroselinum crispum	light responsive element
Potri.006G122900.1	CGTCA-motif	CGTCA	1565	5	+	Hordeum vulgare	MeJA-responsiveness
Potri.006G160700.1	TGA-element	AACGAC	661	6	+	Brassica oleracea	auxin responsiveness
Potri.006G160700.1	GTGGC-motif	GATTCTGTGGC	646	10	+	Spinacia oleracea	light responsive element
Potri.006G160700.1	CAT-box	GCCACT	851	6	-	Arabidopsis thaliana	meristem expression
Potri.006G160700.1	MBS	CAACTG	1392	6	+	Arabidopsis thaliana	drought-inducibility
Potri.006G160700.1	TCT-motif	TCTTAC	466	6	+	Arabidopsis thaliana	light responsive element
Potri.006G160700.1	TCT-motif	TCTTAC	691	6	+	Arabidopsis thaliana	light responsive element
Potri.006G160700.1	TCT-motif	TCTTAC	1422	6	-	Arabidopsis thaliana	light responsive element
Potri.006G160700.1	GT1-motif	GGTTAAT	414	7	-	Avena sativa	light responsive element
Potri.006G160700.1	GT1-motif	GGTTAA	415	6	-	Arabidopsis thaliana	light responsive element
Potri.006G160700.1	ACE	CTAACGTATT	3	9	-	Petroselinum crispum	light responsive element
Potri.006G160700.1	CGTCA-motif	CGTCA	180	5	-	Hordeum vulgare	MeJA-responsiveness
Potri.006G160700.1	CGTCA-motif	CGTCA	575	5	-	Hordeum vulgare	MeJA-responsiveness
Potri.006G160700.1	CGTCA-motif	CGTCA	1474	5	-	Hordeum vulgare	MeJA-responsiveness
Potri.006G160700.1	Box 4	ATTAAT	53	6	+	Petroselinum crispum	light responsive element
Potri.006G160700.1	TGACG-motif	TGACG	180	5	+	Hordeum vulgare	MeJA-responsiveness
Potri.006G160700.1	TGACG-motif	TGACG	575	5	+	Hordeum vulgare	MeJA-responsiveness
Potri.006G160700.1	TGACG-motif	TGACG	1474	5	+	Hordeum vulgare	MeJA-responsiveness
Potri.006G160700.1	GARE-motif	TCTGTTG	223	7	-	Brassica oleracea	gibberellin-responsive element
Potri.006G160700.1	GARE-motif	TCTGTTG	1246	7	-	Brassica oleracea	gibberellin-responsive element
Potri.006G160700.1	TC-rich repeats	GTTTTCTTAC	462	9	+	Nicotiana tabacum	defense and stress responsiveness
Potri.006G160700.1	TC-rich repeats	GTTTTCTTAC	1422	9	-	Nicotiana tabacum	defense and stress responsiveness
Potri.006G169900.1	MRE	AACCTAA	1610	7	+	Petroselinum crispum	light responsive element
Potri.006G169900.1	GARE-motif	TCTGTTG	101	7	+	Brassica oleracea	gibberellin-responsive element
Potri.006G169900.1	LTR	CCGAAA	1705	6	+	Hordeum vulgare	low-temperature responsiveness
Potri.006G169900.1	TGACG-motif	TGACG	248	5	-	Hordeum vulgare	MeJA-responsiveness
Potri.006G169900.1	TGACG-motif	TGACG	277	5	-	Hordeum vulgare	MeJA-responsiveness
Potri.006G169900.1	TC-rich repeats	GTTTTCTTAC	1127	9	-	Nicotiana tabacum	defense and stress responsiveness
Potri.006G170000.1	CGTCA-motif	CGTCA	220	5	+	Hordeum vulgare	MeJA-responsiveness
Potri.006G170000.1	CGTCA-motif	CGTCA	249	5	+	Hordeum vulgare	MeJA-responsiveness
Potri.006G170000.1	CGTCA-motif	CGTCA	578	5	-	Hordeum vulgare	MeJA-responsiveness
Potri.006G170000.1	O2-site	GATGA(C/T)(A/G)TG(A/G)	150	8	-	Zea mays	zein metabolism regulation
Potri.006G170000.1	O2-site	GATGA(C/T)(A/G)TG(A/G)	1911	8	-	Zea mays	zein metabolism regulation
Potri.006G170000.1	MRE	AACCTAA	1610	7	+	Petroselinum crispum	light responsive element
Potri.006G170000.1	GARE-motif	TCTGTTG	73	7	+	Brassica oleracea	gibberellin-responsive element
Potri.006G170000.1	LTR	CCGAAA	1705	6	+	Hordeum vulgare	low-temperature responsiveness
Potri.006G170000.1	TGACG-motif	TGACG	220	5	-	Hordeum vulgare	MeJA-responsiveness
Potri.006G170000.1	TGACG-motif	TGACG	249	5	-	Hordeum vulgare	MeJA-responsiveness
Potri.006G170000.1	TGACG-motif	TGACG	578	5	+	Hordeum vulgare	MeJA-responsiveness
Potri.006G170000.1	TC-rich repeats	GTTTTCTTAC	1115	9	-	Nicotiana tabacum	defense and stress responsiveness
Potri.006G170100.1	ABRE	ACGTG	1750	5	+	Arabidopsis thaliana	abscisic acid responsiveness
Potri.006G170100.1	TCCC-motif	TCTCCCT	10	7	+	Spinacia oleracea	light responsive element
Potri.006G170100.1	TCCC-motif	TCTCCCT	31	7	+	Spinacia oleracea	light responsive element
Potri.006G170100.1	TCCC-motif	TCTCCCT	44	7	+	Spinacia oleracea	light responsive element
Potri.006G170100.1	TGA-element	AACGAC	1641	6	+	Brassica oleracea	auxin responsiveness
Potri.006G170100.1	G-Box	CACGTT	1749	6	-	Pisum sativum	light responsive element
Potri.006G170100.1	ACE	CTAACGTATT	1438	9	-	Petroselinum crispum	light responsive element
Potri.006G170100.1	ARE	AAACCA	1269	6	-	Zea mays	anaerobic induction
Potri.006G170100.1	TCT-motif	TCTTAC	1738	6	-	Arabidopsis thaliana	light responsive element
Potri.006G170100.1	MBS	CAACTG	1576	6	-	Arabidopsis thaliana	drought-inducibility
Potri.006G170100.1	Box 4	ATTAAT	298	6	+	Petroselinum crispum	light responsive element
Potri.006G170100.1	O2-site	GATGACATGG	1003	9	-	Zea mays	zein metabolism regulation
Potri.006G170100.1	O2-site	GATGA(C/T)(A/G)TG(A/G)	1911	8	-	Zea mays	zein metabolism regulation
Potri.006G170100.1	MRE	AACCTAA	1610	7	+	Petroselinum crispum	light responsive element
Potri.006G170100.1	LTR	CCGAAA	1705	6	+	Hordeum vulgare	low-temperature responsiveness
Potri.007G008500.1	LTR	CCGAAA	1640	6	-	Hordeum vulgare	low-temperature responsiveness
Potri.007G008500.1	TGACG-motif	TGACG	1815	5	+	Hordeum vulgare	MeJA-responsiveness
Potri.007G008500.1	chs-CMA2a	TCACTTGA	1865	8	+	Petroselinum crispum	light responsive element
Potri.007G008500.1	AT1-motif	AATTATTTTTTATT	1099	13	+	Solanum tuberosum	light responsive element
Potri.007G008500.1	CGTCA-motif	CGTCA	1815	5	-	Hordeum vulgare	MeJA-responsiveness
Potri.007G008500.1	chs-CMA1a	TTACTTAA	1093	8	+	Daucus carota	light responsive element
Potri.007G008500.1	TCA-element	CCATCTTTTT	1194	9	+	Nicotiana tabacum	light responsive element
Potri.007G008500.1	Box 4	ATTAAT	47	6	+	Petroselinum crispum	light responsive element
Potri.007G008500.1	Box 4	ATTAAT	723	6	+	Petroselinum crispum	light responsive element
Potri.007G008500.1	GT1-motif	GGTTAA	1935	6	-	Arabidopsis thaliana	light responsive element
Potri.007G008500.1	TCT-motif	TCTTAC	1895	6	+	Arabidopsis thaliana	light responsive element
Potri.007G008500.1	ATC-motif	TGCTATCCA	1213	9	+	Pisum sativum	light responsive element
Potri.007G008500.1	MBS	CAACTG	1795	6	-	Arabidopsis thaliana	drought-inducibility
Potri.007G008500.1	MBS	CAACTG	1900	6	+	Arabidopsis thaliana	drought-inducibility
Potri.007G008500.1	circadian	CAAAGATATC	1388	9	-	Lycopersicon esculentum	circadian control
Potri.007G008500.1	TGA-element	AACGAC	148	6	-	Brassica oleracea	auxin responsiveness
Potri.008G138400.1	GATA-motif	AAGGATAAGG	1787	9	-	Solanum tuberosum	light responsive element
Potri.008G138400.1	MBS	CAACTG	1147	6	+	Arabidopsis thaliana	drought-inducibility
Potri.008G138400.1	Sp1	GGGCGG	614	6	+	Oryza sativa	light responsive element
Potri.008G138400.1	GT1-motif	GGTTAA	688	6	+	Arabidopsis thaliana	light responsive element
Potri.008G138400.1	ARE	AAACCA	114	6	-	Zea mays	anaerobic induction
Potri.008G138400.1	ARE	AAACCA	1061	6	-	Zea mays	anaerobic induction
Potri.008G138400.1	TCT-motif	TCTTAC	131	6	-	Arabidopsis thaliana	light responsive element
Potri.008G138400.1	TCT-motif	TCTTAC	1339	6	-	Arabidopsis thaliana	light responsive element
Potri.008G138400.1	Box 4	ATTAAT	88	6	+	Petroselinum crispum	light responsive element
Potri.008G138400.1	Box 4	ATTAAT	268	6	+	Petroselinum crispum	light responsive element
Potri.008G138400.1	Box 4	ATTAAT	1133	6	-	Petroselinum crispum	light responsive element
Potri.008G138400.1	Box 4	ATTAAT	1226	6	-	Petroselinum crispum	light responsive element
Potri.008G138400.1	I-box	gGATAAGGTG	901	9	-	Zea mays	light responsive element
Potri.008G138400.1	I-box	gGATAAGGTG	989	9	+	Zea mays	light responsive element
Potri.008G138400.1	I-box	gGATAAGGTG	1785	9	-	Zea mays	light responsive element
Potri.008G138400.1	P-box	CCTTTTG	1306	7	-	Oryza sativa	gibberellin-responsive element
Potri.008G138400.1	CGTCA-motif	CGTCA	624	5	-	Hordeum vulgare	MeJA-responsiveness
Potri.008G138400.1	AT1-motif	AATTATTTTTTATT	261	13	-	Solanum tuberosum	light responsive element
Potri.008G138400.1	AT1-motif	AATTATTTTTTATT	458	14	+	Solanum tuberosum	light responsive element
Potri.008G138400.1	AE-box	AGAAACTT	927	8	-	Arabidopsis thaliana	light responsive element
Potri.008G138400.1	LTR	CCGAAA	25	6	+	Hordeum vulgare	low-temperature responsiveness
Potri.008G138400.1	LTR	CCGAAA	1454	6	-	Hordeum vulgare	low-temperature responsiveness
Potri.008G138400.1	TGACG-motif	TGACG	624	5	+	Hordeum vulgare	MeJA-responsiveness
Potri.008G138400.1	TC-rich repeats	GTTTTCTTAC	1339	9	-	Nicotiana tabacum	defense and stress responsiveness
Potri.009G006600.1	TGA-element	AACGAC	801	6	-	Brassica oleracea	auxin responsiveness
Potri.009G006600.1	ABRE	ACGTG	464	5	+	Arabidopsis thaliana	abscisic acid responsiveness
Potri.009G006600.1	GT1-motif	GGTTAA	1687	6	-	Arabidopsis thaliana	light responsive element
Potri.009G006600.1	TCT-motif	TCTTAC	67	6	-	Arabidopsis thaliana	light responsive element
Potri.009G006600.1	ARE	AAACCA	832	6	+	Zea mays	anaerobic induction
Potri.009G006600.1	MBS	CAACTG	428	6	-	Arabidopsis thaliana	drought-inducibility
Potri.009G006600.1	MBS	CAACTG	707	6	-	Arabidopsis thaliana	drought-inducibility
Potri.009G006600.1	MBS	CAACTG	1874	6	+	Arabidopsis thaliana	drought-inducibility
Potri.009G006600.1	G-box	TACGTG	463	6	+	Arabidopsis thaliana	light responsive element
Potri.009G006600.1	O2-site	GATGA(C/T)(A/G)TG(A/G)	1780	8	-	Zea mays	zein metabolism regulation
Potri.009G006600.1	AuxRR-core	GGTCCAT	1083	7	+	Nicotiana tabacum	auxin responsiveness
Potri.009G006600.1	CGTCA-motif	CGTCA	1811	5	+	Hordeum vulgare	MeJA-responsiveness
Potri.009G006600.1	TCA-element	CCATCTTTTT	482	9	-	Nicotiana tabacum	light responsive element
Potri.009G006600.1	TCA-element	CCATCTTTTT	1533	9	+	Nicotiana tabacum	light responsive element
Potri.009G006600.1	P-box	CCTTTTG	1313	7	-	Oryza sativa	gibberellin-responsive element
Potri.009G006600.1	Box 4	ATTAAT	5	6	+	Petroselinum crispum	light responsive element
Potri.009G006600.1	Box 4	ATTAAT	1147	6	-	Petroselinum crispum	light responsive element
Potri.009G006600.1	ATCT-motif	AATCTAATCC	22	9	+	Pisum sativum	light responsive element
Potri.009G006600.1	TGACG-motif	TGACG	1811	5	-	Hordeum vulgare	MeJA-responsiveness
Potri.009G006600.1	RY-element	CATGCATG	1650	8	-	Helianthus annuus	seed-specific regulation
Potri.009G006600.1	MRE	AACCTAA	960	7	-	Petroselinum crispum	light responsive element
Potri.009G006600.1	MRE	AACCTAA	1640	7	+	Petroselinum crispum	light responsive element
Potri.009G083800.1	LAMP-element	CTTTATCA	675	8	-	Pisum sativum	light responsive element
Potri.009G083800.1	LAMP-element	CTTTATCA	1346	8	+	Pisum sativum	light responsive element
Potri.009G083800.1	ARE	AAACCA	650	6	-	Zea mays	anaerobic induction
Potri.009G083800.1	ARE	AAACCA	1238	6	+	Zea mays	anaerobic induction
Potri.009G083800.1	TCT-motif	TCTTAC	1680	6	+	Arabidopsis thaliana	light responsive element
Potri.009G083800.1	GT1-motif	GGTTAAT	940	7	+	Avena sativa	light responsive element
Potri.009G083800.1	GATA-motif	AAGGATAAGG	459	9	-	Solanum tuberosum	light responsive element
Potri.009G083800.1	G-box	CACGAC	311	6	-	Zea mays	light responsive element
Potri.009G083800.1	TATC-box	TATCCCA	204	7	+	Oryza sativa	gibberellin-responsive element
Potri.009G083800.1	TGA-element	AACGAC	1588	6	+	Brassica oleracea	auxin responsiveness
Potri.009G083800.1	LTR	CCGAAA	1011	6	-	Hordeum vulgare	low-temperature responsiveness
Potri.009G083800.1	LTR	CCGAAA	1293	6	+	Hordeum vulgare	low-temperature responsiveness
Potri.009G083800.1	TGACG-motif	TGACG	1024	5	-	Hordeum vulgare	MeJA-responsiveness
Potri.009G083800.1	RY-element	CATGCATG	790	8	+	Helianthus annuus	seed-specific regulation
Potri.009G083800.1	CGTCA-motif	CGTCA	1024	5	+	Hordeum vulgare	MeJA-responsiveness
Potri.009G083800.1	O2-site	GATGACATGG	785	9	+	Zea mays	zein metabolism regulation
Potri.009G083800.1	Box 4	ATTAAT	422	6	+	Petroselinum crispum	light responsive element
Potri.010G102300.1	3-AF1 binding site	TAAGAGAGGAA	1840	10	-	Solanum tuberosum	light responsive element
Potri.010G102300.1	TGACG-motif	TGACG	1571	5	-	Hordeum vulgare	MeJA-responsiveness
Potri.010G102300.1	CGTCA-motif	CGTCA	1571	5	+	Hordeum vulgare	MeJA-responsiveness
Potri.010G102300.1	Gap-box	CAAATGAA(A/G)A	860	9.5	+	Arabidopsis thaliana	light responsive element
Potri.010G102300.1	Gap-box	CAAATGAA(A/G)A	1606	9.5	+	Arabidopsis thaliana	light responsive element
Potri.010G102300.1	TCA-element	CCATCTTTTT	184	9	-	Nicotiana tabacum	light responsive element
Potri.010G102300.1	Box 4	ATTAAT	255	6	+	Petroselinum crispum	light responsive element
Potri.010G102300.1	Box 4	ATTAAT	1096	6	-	Petroselinum crispum	light responsive element
Potri.010G102300.1	ARE	AAACCA	764	6	+	Zea mays	anaerobic induction
Potri.010G102300.1	ARE	AAACCA	796	6	+	Zea mays	anaerobic induction
Potri.010G102300.1	ARE	AAACCA	1106	6	+	Zea mays	anaerobic induction
Potri.010G102300.1	ARE	AAACCA	1301	6	-	Zea mays	anaerobic induction
Potri.010G102300.1	TCT-motif	TCTTAC	1846	6	+	Arabidopsis thaliana	light responsive element
Potri.010G102300.1	GT1-motif	GGTTAA	457	6	-	Arabidopsis thaliana	light responsive element
Potri.010G102300.1	GT1-motif	GGTTAA	467	6	-	Arabidopsis thaliana	light responsive element
Potri.010G102300.1	GT1-motif	GTGTGTGAA	1888	9	-	Solanum tuberosum	light responsive element
Potri.010G102300.1	GATA-motif	GATAGGG	137	7	+	Pisum sativum	light responsive element
Potri.010G102300.1	TCCC-motif	TCTCCCT	1701	7	+	Spinacia oleracea	light responsive element
Potri.010G102300.1	TCCC-motif	TCTCCCT	1759	7	+	Spinacia oleracea	light responsive element
Potri.011G025800.1	ARE	AAACCA	418	6	+	Zea mays	anaerobic induction
Potri.011G025800.1	ARE	AAACCA	595	6	-	Zea mays	anaerobic induction
Potri.011G025800.1	ARE	AAACCA	790	6	-	Zea mays	anaerobic induction
Potri.011G025800.1	ARE	AAACCA	855	6	+	Zea mays	anaerobic induction
Potri.011G025800.1	ARE	AAACCA	1406	6	-	Zea mays	anaerobic induction
Potri.011G025800.1	ARE	AAACCA	1501	6	+	Zea mays	anaerobic induction
Potri.011G025800.1	GT1-motif	GGTTAA	746	6	+	Arabidopsis thaliana	light responsive element
Potri.011G025800.1	GT1-motif	GGTTAAT	1086	7	-	Avena sativa	light responsive element
Potri.011G025800.1	GT1-motif	GGTTAA	1087	6	-	Arabidopsis thaliana	light responsive element
Potri.011G025800.1	GT1-motif	GGTTAA	1487	6	+	Arabidopsis thaliana	light responsive element
Potri.011G025800.1	ACE	CTAACGTATT	871	9	-	Petroselinum crispum	light responsive element
Potri.011G025800.1	GATA-motif	AAGGATAAGG	1043	9	+	Solanum tuberosum	light responsive element
Potri.011G025800.1	GATA-motif	AAGATAAGATT	1707	10	+	Arabidopsis thaliana	light responsive element
Potri.011G025800.1	MSA-like	(T/C)C(T/C)AACGG(T/C)(T/C)A	1245	8.5	+	Catharanthus roseus	cell cycle regulation
Potri.011G025800.1	GA-motif	ATAGATAA	1035	8	+	Arabidopsis thaliana	light responsive element
Potri.011G025800.1	MRE	AACCTAA	409	7	+	Petroselinum crispum	light responsive element
Potri.011G025800.1	AT1-motif	AATTATTTTTTATT	705	13	-	Solanum tuberosum	light responsive element
Potri.011G025800.1	Box 4	ATTAAT	712	6	+	Petroselinum crispum	light responsive element
Potri.011G025800.1	Box 4	ATTAAT	716	6	+	Petroselinum crispum	light responsive element
Potri.011G025800.1	Box 4	ATTAAT	720	6	+	Petroselinum crispum	light responsive element
Potri.011G025800.1	Box 4	ATTAAT	724	6	+	Petroselinum crispum	light responsive element
Potri.011G025800.1	TCA-element	CCATCTTTTT	543	9	-	Nicotiana tabacum	light responsive element
Potri.011G077300.1	ABRE	ACGTG	460	5	+	Arabidopsis thaliana	abscisic acid responsiveness
Potri.011G077300.1	ABRE	ACGTG	511	5	+	Arabidopsis thaliana	abscisic acid responsiveness
Potri.011G077300.1	ABRE	CACGTG	1381	6	-	Arabidopsis thaliana	abscisic acid responsiveness
Potri.011G077300.1	ABRE	ACGTG	1382	5	+	Arabidopsis thaliana	abscisic acid responsiveness
Potri.011G077300.1	ABRE	ACGTG	1837	5	+	Arabidopsis thaliana	abscisic acid responsiveness
Potri.011G077300.1	ABRE	ACGTG	1981	5	-	Arabidopsis thaliana	abscisic acid responsiveness
Potri.011G077300.1	GATA-motif	GATAGGA	1023	7	-	Arabidopsis thaliana	light responsive element
Potri.011G077300.1	G-Box	CACGTG	1381	6	-	Pisum sativum	light responsive element
Potri.011G077300.1	G-Box	CACGTT	1836	6	-	Pisum sativum	light responsive element
Potri.011G077300.1	G-Box	CACGTT	1981	6	+	Pisum sativum	light responsive element
Potri.011G077300.1	G-box	CACGTC	459	6	-	Zea mays	light responsive element
Potri.011G077300.1	G-box	CACGTC	510	6	-	Zea mays	light responsive element
Potri.011G077300.1	G-box	CACGTG	1381	6	-	Arabidopsis thaliana	light responsive element
Potri.011G077300.1	LAMP-element	CTTTATCA	1506	8	-	Pisum sativum	light responsive element
Potri.011G077300.1	CAT-box	GCCACT	748	6	-	Arabidopsis thaliana	meristem expression
Potri.011G077300.1	GT1-motif	GGTTAAT	1713	7	+	Avena sativa	light responsive element
Potri.011G077300.1	GT1-motif	GGTTAA	1950	6	-	Arabidopsis thaliana	light responsive element
Potri.011G077300.1	TCT-motif	TCTTAC	756	6	+	Arabidopsis thaliana	light responsive element
Potri.011G077300.1	TCT-motif	TCTTAC	1792	6	-	Arabidopsis thaliana	light responsive element
Potri.011G077300.1	ARE	AAACCA	375	6	+	Zea mays	anaerobic induction
Potri.011G077300.1	ARE	AAACCA	810	6	-	Zea mays	anaerobic induction
Potri.011G077300.1	ARE	AAACCA	1371	6	+	Zea mays	anaerobic induction
Potri.011G077300.1	TCA-element	CCATCTTTTT	1426	9	+	Nicotiana tabacum	light responsive element
Potri.011G077300.1	Box 4	ATTAAT	68	6	+	Petroselinum crispum	light responsive element
Potri.011G077300.1	Box 4	ATTAAT	1015	6	-	Petroselinum crispum	light responsive element
Potri.011G077300.1	Box 4	ATTAAT	1970	6	-	Petroselinum crispum	light responsive element
Potri.011G077300.1	CGTCA-motif	CGTCA	683	5	-	Hordeum vulgare	MeJA-responsiveness
Potri.011G077300.1	CGTCA-motif	CGTCA	698	5	-	Hordeum vulgare	MeJA-responsiveness
Potri.011G077300.1	CGTCA-motif	CGTCA	742	5	-	Hordeum vulgare	MeJA-responsiveness
Potri.011G077300.1	O2-site	GATGA(C/T)(A/G)TG(A/G)	517	8	-	Zea mays	zein metabolism regulation
Potri.011G077300.1	AE-box	AGAAACTT	353	8	-	Arabidopsis thaliana	light responsive element
Potri.011G077300.1	TGACG-motif	TGACG	683	5	+	Hordeum vulgare	MeJA-responsiveness
Potri.011G077300.1	TGACG-motif	TGACG	698	5	+	Hordeum vulgare	MeJA-responsiveness
Potri.011G077300.1	TGACG-motif	TGACG	742	5	+	Hordeum vulgare	MeJA-responsiveness
Potri.011G077400.1	GT1-motif	GTGTGTGAA	670	9	+	Solanum tuberosum	light responsive element
Potri.011G077400.1	GT1-motif	GGTTAA	1928	6	+	Arabidopsis thaliana	light responsive element
Potri.011G077400.1	ARE	AAACCA	1508	6	-	Zea mays	anaerobic induction
Potri.011G077400.1	ARE	AAACCA	1858	6	-	Zea mays	anaerobic induction
Potri.011G077400.1	TCT-motif	TCTTAC	466	6	-	Arabidopsis thaliana	light responsive element
Potri.011G077400.1	TCT-motif	TCTTAC	591	6	+	Arabidopsis thaliana	light responsive element
Potri.011G077400.1	G-box	TACGTG	72	6	+	Arabidopsis thaliana	light responsive element
Potri.011G077400.1	G-box	CACGTC	1287	6	-	Zea mays	light responsive element
Potri.011G077400.1	G-box	ACACGTGT	1338	8	-	Brassica napus	light responsive element
Potri.011G077400.1	G-box	CACGTG	1339	6	-	Arabidopsis thaliana	light responsive element
Potri.011G077400.1	ACE	GACACGTATG	1337	9	+	Petroselinum crispum	light responsive element
Potri.011G077400.1	G-Box	CACGTG	1339	6	-	Pisum sativum	light responsive element
Potri.011G077400.1	TGA-element	AACGAC	1937	6	-	Brassica oleracea	auxin responsiveness
Potri.011G077400.1	MSA-like	TCAAACGGT	1171	9	+	Catharanthus roseus	cell cycle regulation
Potri.011G077400.1	ABRE	ACGTG	73	5	+	Arabidopsis thaliana	abscisic acid responsiveness
Potri.011G077400.1	ABRE	ACGTG	1288	5	+	Arabidopsis thaliana	abscisic acid responsiveness
Potri.011G077400.1	ABRE	CGCACGTGTC	1337	9	-	Hordeum vulgare	abscisic acid responsiveness
Potri.011G077400.1	ABRE	CACGTG	1339	6	-	Arabidopsis thaliana	abscisic acid responsiveness
Potri.011G077400.1	ABRE	ACGTG	1340	5	+	Arabidopsis thaliana	abscisic acid responsiveness
Potri.011G077400.1	TCCC-motif	TCTCCCT	1131	7	-	Spinacia oleracea	light responsive element
Potri.011G077400.1	TCCC-motif	TCTCCCT	1272	7	-	Spinacia oleracea	light responsive element
Potri.011G077400.1	TGACG-motif	TGACG	998	5	+	Hordeum vulgare	MeJA-responsiveness
Potri.011G077400.1	TGACG-motif	TGACG	1286	5	+	Hordeum vulgare	MeJA-responsiveness
Potri.011G077400.1	MRE	AACCTAA	1196	7	-	Petroselinum crispum	light responsive element
Potri.011G077400.1	CGTCA-motif	CGTCA	998	5	-	Hordeum vulgare	MeJA-responsiveness
Potri.011G077400.1	CGTCA-motif	CGTCA	1286	5	-	Hordeum vulgare	MeJA-responsiveness
Potri.011G077400.1	Box 4	ATTAAT	1413	6	-	Petroselinum crispum	light responsive element
Potri.011G077400.1	TCA-element	CCATCTTTTT	1753	9	+	Nicotiana tabacum	light responsive element
Potri.011G077400.1	TCA-element	CCATCTTTTT	1900	9	+	Nicotiana tabacum	light responsive element
Potri.011G077400.1	I-box	cCATATCCAAT	884	10	-	Flaveria trinervia	light responsive element
Potri.013G005700.1	GATA-motif	GATAGGA	1602	7	+	Arabidopsis thaliana	light responsive element
Potri.013G005700.1	GATA-motif	GATAGGA	1942	7	-	Arabidopsis thaliana	light responsive element
Potri.013G005700.1	G-Box	CACGTT	800	6	+	Pisum sativum	light responsive element
Potri.013G005700.1	G-box	TACGTG	1496	6	+	Arabidopsis thaliana	light responsive element
Potri.013G005700.1	LAMP-element	CTTTATCA	200	8	-	Pisum sativum	light responsive element
Potri.013G005700.1	MBS	CAACTG	603	6	+	Arabidopsis thaliana	drought-inducibility
Potri.013G005700.1	MBS	CAACTG	1901	6	+	Arabidopsis thaliana	drought-inducibility
Potri.013G005700.1	GT1-motif	GGTTAA	1377	6	-	Arabidopsis thaliana	light responsive element
Potri.013G005700.1	TCT-motif	TCTTAC	1584	6	-	Arabidopsis thaliana	light responsive element
Potri.013G005700.1	ARE	AAACCA	1003	6	-	Zea mays	anaerobic induction
Potri.013G005700.1	ABRE	ACGTG	800	5	-	Arabidopsis thaliana	abscisic acid responsiveness
Potri.013G005700.1	ABRE	GCAACGTGTC	938	9	-	Hordeum vulgare	abscisic acid responsiveness
Potri.013G005700.1	ABRE	ACGTG	1497	5	+	Arabidopsis thaliana	abscisic acid responsiveness
Potri.013G005700.1	TATC-box	TATCCCA	567	7	+	Oryza sativa	gibberellin-responsive element
Potri.013G005700.1	TATC-box	TATCCCA	1704	7	+	Oryza sativa	gibberellin-responsive element
Potri.013G005700.1	TGA-element	AACGAC	1525	6	+	Brassica oleracea	auxin responsiveness
Potri.013G005700.1	LTR	CCGAAA	1190	6	+	Hordeum vulgare	low-temperature responsiveness
Potri.013G005700.1	TGACG-motif	TGACG	1566	5	+	Hordeum vulgare	MeJA-responsiveness
Potri.013G005700.1	TC-rich repeats	GTTTTCTTAC	1584	9	-	Nicotiana tabacum	defense and stress responsiveness
Potri.013G005700.1	TC-rich repeats	GTTTTCTTAC	1649	9	-	Nicotiana tabacum	defense and stress responsiveness
Potri.013G005700.1	TCA-element	CCATCTTTTT	430	9	-	Nicotiana tabacum	light responsive element
Potri.013G005700.1	TCA-element	CCATCTTTTT	1686	10	+	Nicotiana tabacum	light responsive element
Potri.013G005700.1	TCA-element	CCATCTTTTT	1796	9	+	Nicotiana tabacum	light responsive element
Potri.013G005700.1	Box 4	ATTAAT	414	6	+	Petroselinum crispum	light responsive element
Potri.013G005700.1	Box 4	ATTAAT	1313	6	-	Petroselinum crispum	light responsive element
Potri.013G005700.1	CGTCA-motif	CGTCA	1566	5	-	Hordeum vulgare	MeJA-responsiveness
Potri.013G005700.1	O2-site	GATGACATGG	1127	9	+	Zea mays	zein metabolism regulation
Potri.013G005700.1	AuxRR-core	GGTCCAT	749	7	+	Nicotiana tabacum	auxin responsiveness
Potri.013G152400.1	O2-site	GATGACATGG	1293	9	+	Zea mays	zein metabolism regulation
Potri.013G152400.1	CGTCA-motif	CGTCA	941	5	-	Hordeum vulgare	MeJA-responsiveness
Potri.013G152400.1	CGTCA-motif	CGTCA	1786	5	-	Hordeum vulgare	MeJA-responsiveness
Potri.013G152400.1	chs-CMA1a	TTACTTAA	1715	8	-	Daucus carota	light responsive element
Potri.013G152400.1	Box 4	ATTAAT	567	6	+	Petroselinum crispum	light responsive element
Potri.013G152400.1	Box 4	ATTAAT	726	6	+	Petroselinum crispum	light responsive element
Potri.013G152400.1	Box 4	ATTAAT	790	6	+	Petroselinum crispum	light responsive element
Potri.013G152400.1	Box 4	ATTAAT	1415	6	-	Petroselinum crispum	light responsive element
Potri.013G152400.1	ATCT-motif	AATCTAATCC	783	9	-	Pisum sativum	light responsive element
Potri.013G152400.1	GA-motif	ATAGATAA	1409	8	-	Arabidopsis thaliana	light responsive element
Potri.013G152400.1	TGACG-motif	TGACG	941	5	+	Hordeum vulgare	MeJA-responsiveness
Potri.013G152400.1	TGACG-motif	TGACG	1786	5	+	Hordeum vulgare	MeJA-responsiveness
Potri.013G152400.1	ABRE	ACGTG	943	5	+	Arabidopsis thaliana	abscisic acid responsiveness
Potri.013G152400.1	ABRE	GACACGTGGC	1116	9	-	Triticum aestivum	abscisic acid responsiveness
Potri.013G152400.1	ABRE	CACGTG	1118	6	-	Arabidopsis thaliana	abscisic acid responsiveness
Potri.013G152400.1	ABRE	ACGTG	1119	5	+	Arabidopsis thaliana	abscisic acid responsiveness
Potri.013G152400.1	ABRE	ACGTG	1285	5	+	Arabidopsis thaliana	abscisic acid responsiveness
Potri.013G152400.1	ABRE	ACGTG	1788	5	+	Arabidopsis thaliana	abscisic acid responsiveness
Potri.013G152400.1	ARE	AAACCA	804	6	+	Zea mays	anaerobic induction
Potri.013G152400.1	CAT-box	GCCACT	1809	6	-	Arabidopsis thaliana	meristem expression
Potri.013G152400.1	MBS	CAACTG	1083	6	+	Arabidopsis thaliana	drought-inducibility
Potri.013G152400.1	MBS	CAACTG	1149	6	+	Arabidopsis thaliana	drought-inducibility
Potri.013G152400.1	G-Box	CACGTG	1118	6	-	Pisum sativum	light responsive element
Potri.013G152400.1	G-box	CACGTC	942	6	-	Zea mays	light responsive element
Potri.013G152400.1	G-box	tgACACGTGGCA	1115	11	-	Lycopersicon esculentum	light responsive element
Potri.013G152400.1	G-box	CACGTG	1118	6	-	Arabidopsis thaliana	light responsive element
Potri.013G152400.1	G-box	CAGACGTGGCA	1282	10	+	Nicotiana plumbaginifolia	light responsive element
Potri.013G152400.1	G-box	CACGTC	1284	6	-	Zea mays	light responsive element
Potri.013G152400.1	G-box	CACGTC	1787	6	-	Zea mays	light responsive element
Potri.013G152400.1	GATA-motif	AAGATAAGATT	782	10	+	Arabidopsis thaliana	light responsive element
Potri.014G115000.1	TGACG-motif	TGACG	1974	5	-	Hordeum vulgare	MeJA-responsiveness
Potri.014G115000.1	TGACG-motif	TGACG	1989	5	-	Hordeum vulgare	MeJA-responsiveness
Potri.014G115000.1	ATCT-motif	AATCTAATCC	544	9	+	Pisum sativum	light responsive element
Potri.014G115000.1	TC-rich repeats	GTTTTCTTAC	557	9	-	Nicotiana tabacum	defense and stress responsiveness
Potri.014G115000.1	TC-rich repeats	ATTCTCTAAC	1070	9	+	Nicotiana tabacum	defense and stress responsiveness
Potri.014G115000.1	TC-rich repeats	ATTCTCTAAC	1731	9	-	Nicotiana tabacum	defense and stress responsiveness
Potri.014G115000.1	Box 4	ATTAAT	407	6	+	Petroselinum crispum	light responsive element
Potri.014G115000.1	Box 4	ATTAAT	599	6	+	Petroselinum crispum	light responsive element
Potri.014G115000.1	Box 4	ATTAAT	645	6	+	Petroselinum crispum	light responsive element
Potri.014G115000.1	Box 4	ATTAAT	1362	6	-	Petroselinum crispum	light responsive element
Potri.014G115000.1	TCA-element	CCATCTTTTT	131	9	-	Nicotiana tabacum	light responsive element
Potri.014G115000.1	CGTCA-motif	CGTCA	1974	5	+	Hordeum vulgare	MeJA-responsiveness
Potri.014G115000.1	CGTCA-motif	CGTCA	1989	5	+	Hordeum vulgare	MeJA-responsiveness
Potri.014G115000.1	O2-site	GTTGACGTGA	1986	9	-	Zea mays	zein metabolism regulation
Potri.014G115000.1	GATA-motif	AAGATAAGATT	1354	10	+	Arabidopsis thaliana	light responsive element
Potri.014G115000.1	G-box	CACGTG	1420	6	-	Arabidopsis thaliana	light responsive element
Potri.014G115000.1	G-box	CACGTC	1987	6	+	Zea mays	light responsive element
Potri.014G115000.1	G-Box	CACGTT	1273	6	-	Pisum sativum	light responsive element
Potri.014G115000.1	G-Box	CACGTG	1420	6	-	Pisum sativum	light responsive element
Potri.014G115000.1	MBS	CAACTG	493	6	+	Arabidopsis thaliana	drought-inducibility
Potri.014G115000.1	TCT-motif	TCTTAC	153	6	+	Arabidopsis thaliana	light responsive element
Potri.014G115000.1	TCT-motif	TCTTAC	557	6	-	Arabidopsis thaliana	light responsive element
Potri.014G115000.1	TCT-motif	TCTTAC	1259	6	-	Arabidopsis thaliana	light responsive element
Potri.014G115000.1	TCT-motif	TCTTAC	1731	6	-	Arabidopsis thaliana	light responsive element
Potri.014G115000.1	ARE	AAACCA	821	6	-	Zea mays	anaerobic induction
Potri.014G115000.1	ARE	AAACCA	1252	6	+	Zea mays	anaerobic induction
Potri.014G115000.1	ARE	AAACCA	1820	6	+	Zea mays	anaerobic induction
Potri.014G115000.1	GT1-motif	GGTTAA	1313	6	+	Arabidopsis thaliana	light responsive element
Potri.014G115000.1	ABRE	ACGTG	1274	5	+	Arabidopsis thaliana	abscisic acid responsiveness
Potri.014G115000.1	ABRE	CACGTG	1420	6	-	Arabidopsis thaliana	abscisic acid responsiveness
Potri.014G115000.1	ABRE	ACGTG	1421	5	+	Arabidopsis thaliana	abscisic acid responsiveness
Potri.014G115000.1	ABRE	ACGTG	1987	5	-	Arabidopsis thaliana	abscisic acid responsiveness
Potri.014G115000.1	TGA-element	AACGAC	360	6	-	Brassica oleracea	auxin responsiveness
Potri.014G115000.1	circadian	CAAAGATATC	395	9	+	Lycopersicon esculentum	circadian control
Potri.014G115000.1	circadian	CAAAGATATC	1154	10	+	Lycopersicon esculentum	circadian control
Potri.014G140300.1	MBS	CAACTG	796	6	+	Arabidopsis thaliana	drought-inducibility
Potri.014G140300.1	ATC-motif	AGCTATCCA	969	9	-	Arabidopsis thaliana	light responsive element
Potri.014G140300.1	GC-motif	CCCCCG	1910	6	-	Zea mays	anoxic specific inducibility
Potri.014G140300.1	G-Box	CACGTG	178	6	+	Pisum sativum	light responsive element
Potri.014G140300.1	G-Box	CACGTG	674	6	+	Pisum sativum	light responsive element
Potri.014G140300.1	G-Box	CACGTT	1568	6	-	Pisum sativum	light responsive element
Potri.014G140300.1	G-Box	CACGTT	1717	6	+	Pisum sativum	light responsive element
Potri.014G140300.1	G-box	CACGTG	178	6	+	Arabidopsis thaliana	light responsive element
Potri.014G140300.1	G-box	GCCACGTGGA	492	9	+	Arabidopsis thaliana	light responsive element
Potri.014G140300.1	G-box	CACGTC	494	6	-	Zea mays	light responsive element
Potri.014G140300.1	G-box	TACGTG	610	6	+	Arabidopsis thaliana	light responsive element
Potri.014G140300.1	G-box	CACGTG	674	6	+	Arabidopsis thaliana	light responsive element
Potri.014G140300.1	TGA-element	AACGAC	465	6	-	Brassica oleracea	auxin responsiveness
Potri.014G140300.1	ABRE	CACGTG	178	6	+	Arabidopsis thaliana	abscisic acid responsiveness
Potri.014G140300.1	ABRE	ACGTG	179	5	+	Arabidopsis thaliana	abscisic acid responsiveness
Potri.014G140300.1	ABRE	ACGTG	495	5	+	Arabidopsis thaliana	abscisic acid responsiveness
Potri.014G140300.1	ABRE	ACGTG	611	5	+	Arabidopsis thaliana	abscisic acid responsiveness
Potri.014G140300.1	ABRE	CACGTG	674	6	+	Arabidopsis thaliana	abscisic acid responsiveness
Potri.014G140300.1	ABRE	ACGTG	675	5	+	Arabidopsis thaliana	abscisic acid responsiveness
Potri.014G140300.1	ABRE	ACGTG	1569	5	+	Arabidopsis thaliana	abscisic acid responsiveness
Potri.014G140300.1	ABRE	ACGTG	1717	5	-	Arabidopsis thaliana	abscisic acid responsiveness
Potri.014G140300.1	GARE-motif	TCTGTTG	1957	7	+	Brassica oleracea	gibberellin-responsive element
Potri.014G140300.1	TGACG-motif	TGACG	1782	5	-	Hordeum vulgare	MeJA-responsiveness
Potri.014G140300.1	3-AF1 binding site	TAAGAGAGGAA	304	10	+	Solanum tuberosum	light responsive element
Potri.014G140300.1	AE-box	AGAAACTT	417	8	+	Arabidopsis thaliana	light responsive element
Potri.014G140300.1	CGTCA-motif	CGTCA	1782	5	+	Hordeum vulgare	MeJA-responsiveness
Potri.014G140300.1	O2-site	GATGACATGG	137	9	-	Zea mays	zein metabolism regulation
Potri.014G140300.1	O2-site	GATGATGTGG	848	9	+	Zea mays	zein metabolism regulation
Potri.014G140300.1	AuxRR-core	GGTCCAT	627	7	-	Nicotiana tabacum	auxin responsiveness
Potri.014G140300.1	Box 4	ATTAAT	203	6	+	Petroselinum crispum	light responsive element
Potri.014G140300.1	Box 4	ATTAAT	925	6	+	Petroselinum crispum	light responsive element
Potri.014G146100.1	GC-motif	CCCCCG	1369	6	-	Zea mays	anoxic specific inducibility
Potri.014G146100.1	G-box	CACGTC	363	6	+	Zea mays	light responsive element
Potri.014G146100.1	G-box	CCACGTAA	1235	8	-	Brassica napus	light responsive element
Potri.014G146100.1	G-box	TACGTG	1236	6	+	Arabidopsis thaliana	light responsive element
Potri.014G146100.1	GATA-motif	GATAGGG	728	7	-	Pisum sativum	light responsive element
Potri.014G146100.1	GT1-motif	GGTTAA	422	6	-	Arabidopsis thaliana	light responsive element
Potri.014G146100.1	GT1-motif	GGTTAA	452	6	-	Arabidopsis thaliana	light responsive element
Potri.014G146100.1	ARE	AAACCA	496	6	+	Zea mays	anaerobic induction
Potri.014G146100.1	ARE	AAACCA	1398	6	-	Zea mays	anaerobic induction
Potri.014G146100.1	ARE	AAACCA	1514	6	+	Zea mays	anaerobic induction
Potri.014G146100.1	TCT-motif	TCTTAC	1202	6	-	Arabidopsis thaliana	light responsive element
Potri.014G146100.1	LAMP-element	CTTTATCA	1262	8	-	Pisum sativum	light responsive element
Potri.014G146100.1	CAT-box	GCCACT	390	6	+	Arabidopsis thaliana	meristem expression
Potri.014G146100.1	ABRE	ACGTG	363	5	-	Arabidopsis thaliana	abscisic acid responsiveness
Potri.014G146100.1	ABRE	ACGTG	1237	5	+	Arabidopsis thaliana	abscisic acid responsiveness
Potri.014G146100.1	RY-element	CATGCATG	890	8	+	Helianthus annuus	seed-specific regulation
Potri.014G146100.1	TGACG-motif	TGACG	320	5	+	Hordeum vulgare	MeJA-responsiveness
Potri.014G146100.1	TGACG-motif	TGACG	325	5	-	Hordeum vulgare	MeJA-responsiveness
Potri.014G146100.1	LTR	CCGAAA	1275	6	+	Hordeum vulgare	low-temperature responsiveness
Potri.014G146100.1	Box 4	ATTAAT	164	6	+	Petroselinum crispum	light responsive element
Potri.014G146100.1	Box 4	ATTAAT	217	6	+	Petroselinum crispum	light responsive element
Potri.014G146100.1	Box 4	ATTAAT	960	6	+	Petroselinum crispum	light responsive element
Potri.014G146100.1	Box 4	ATTAAT	1423	6	-	Petroselinum crispum	light responsive element
Potri.014G146100.1	Box 4	ATTAAT	1457	6	-	Petroselinum crispum	light responsive element
Potri.014G146100.1	Box 4	ATTAAT	1621	6	-	Petroselinum crispum	light responsive element
Potri.014G146100.1	Box 4	ATTAAT	1655	6	-	Petroselinum crispum	light responsive element
Potri.014G146100.1	AuxRR-core	GGTCCAT	1373	7	+	Nicotiana tabacum	auxin responsiveness
Potri.014G146100.1	AT1-motif	AATTATTTTTTATT	912	13	+	Solanum tuberosum	light responsive element
Potri.014G146100.1	C-box	ACGAGCACCGCC	1138	11	+	Hordeum vulgare	light responsive element
Potri.014G146100.1	CGTCA-motif	CGTCA	320	5	-	Hordeum vulgare	MeJA-responsiveness
Potri.014G146100.1	CGTCA-motif	CGTCA	325	5	+	Hordeum vulgare	MeJA-responsiveness
Potri.014G152700.1	Sp1	GGGCGG	1837	6	-	Oryza sativa	light responsive element
Potri.014G152700.1	ARE	AAACCA	538	6	+	Zea mays	anaerobic induction
Potri.014G152700.1	ARE	AAACCA	1727	6	+	Zea mays	anaerobic induction
Potri.014G152700.1	ARE	AAACCA	1753	6	-	Zea mays	anaerobic induction
Potri.014G152700.1	TCT-motif	TCTTAC	1037	6	+	Arabidopsis thaliana	light responsive element
Potri.014G152700.1	GT1-motif	GGTTAAT	1402	7	+	Avena sativa	light responsive element
Potri.014G152700.1	G-box	TACGTG	1042	6	-	Arabidopsis thaliana	light responsive element
Potri.014G152700.1	G-box	CACGAC	1155	6	-	Zea mays	light responsive element
Potri.014G152700.1	ABRE	ACGTG	1042	5	-	Arabidopsis thaliana	abscisic acid responsiveness
Potri.014G152700.1	Gap-box	CAAATGAA(A/G)A	94	9.5	+	Arabidopsis thaliana	light responsive element
Potri.014G152700.1	AT1-motif	AATTATTTTTTATT	437	13	+	Solanum tuberosum	light responsive element
Potri.014G152700.1	Box 4	ATTAAT	642	6	+	Petroselinum crispum	light responsive element
Potri.014G152700.1	Box 4	ATTAAT	937	6	+	Petroselinum crispum	light responsive element
Potri.014G152700.1	Box 4	ATTAAT	1009	6	-	Petroselinum crispum	light responsive element
Potri.014G152700.1	Box 4	ATTAAT	1013	6	-	Petroselinum crispum	light responsive element
Potri.014G152700.1	Box 4	ATTAAT	1463	6	-	Petroselinum crispum	light responsive element
Potri.016G098600.1	O2-site	GATGATGTGG	1188	9	-	Zea mays	zein metabolism regulation
Potri.016G098600.1	CGTCA-motif	CGTCA	88	5	+	Hordeum vulgare	MeJA-responsiveness
Potri.016G098600.1	TCA-element	CCATCTTTTT	1747	9	+	Nicotiana tabacum	light responsive element
Potri.016G098600.1	Box 4	ATTAAT	1288	6	-	Petroselinum crispum	light responsive element
Potri.016G098600.1	TC-rich repeats	ATTCTCTAAC	1783	9	+	Nicotiana tabacum	defense and stress responsiveness
Potri.016G098600.1	ATCT-motif	AATCTAATCC	1359	9	+	Pisum sativum	light responsive element
Potri.016G098600.1	LTR	CCGAAA	678	6	+	Hordeum vulgare	low-temperature responsiveness
Potri.016G098600.1	TGACG-motif	TGACG	88	5	-	Hordeum vulgare	MeJA-responsiveness
Potri.016G098600.1	MRE	AACCTAA	1464	7	-	Petroselinum crispum	light responsive element
Potri.016G098600.1	MRE	AACCTAA	1573	7	+	Petroselinum crispum	light responsive element
Potri.016G098600.1	TCCC-motif	TCTCCCT	1605	7	+	Spinacia oleracea	light responsive element
Potri.016G098600.1	ABRE	ACGTG	1510	5	+	Arabidopsis thaliana	abscisic acid responsiveness
Potri.016G098600.1	ABRE	ACGTG	1896	5	-	Arabidopsis thaliana	abscisic acid responsiveness
Potri.016G098600.1	TCT-motif	TCTTAC	1640	6	+	Arabidopsis thaliana	light responsive element
Potri.016G098600.1	LAMP-element	CTTTATCA	1856	8	+	Pisum sativum	light responsive element
Potri.016G098600.1	MBS	CAACTG	278	6	+	Arabidopsis thaliana	drought-inducibility
Potri.016G098600.1	MBS	CAACTG	1862	6	+	Arabidopsis thaliana	drought-inducibility
Potri.016G098600.1	G-box	CACGAC	1482	6	-	Zea mays	light responsive element
Potri.016G098600.1	G-box	TACGTG	1509	6	+	Arabidopsis thaliana	light responsive element
Potri.016G098600.1	G-box	CCACGTAA	1895	8	+	Brassica napus	light responsive element
Potri.016G098600.1	G-box	TACGTG	1896	6	-	Arabidopsis thaliana	light responsive element
Potri.018G084300.1	AE-box	AGAAACTT	1870	8	+	Arabidopsis thaliana	light responsive element
Potri.018G084300.1	AE-box	AGAAACTT	1977	8	+	Arabidopsis thaliana	light responsive element
Potri.018G084300.1	TGACG-motif	TGACG	1204	5	-	Hordeum vulgare	MeJA-responsiveness
Potri.018G084300.1	TGACG-motif	TGACG	1831	5	-	Hordeum vulgare	MeJA-responsiveness
Potri.018G084300.1	Box 4	ATTAAT	846	6	+	Petroselinum crispum	light responsive element
Potri.018G084300.1	Box 4	ATTAAT	1412	6	-	Petroselinum crispum	light responsive element
Potri.018G084300.1	chs-CMA2a	TCACTTGA	349	8	-	Petroselinum crispum	light responsive element
Potri.018G084300.1	CGTCA-motif	CGTCA	1204	5	+	Hordeum vulgare	MeJA-responsiveness
Potri.018G084300.1	CGTCA-motif	CGTCA	1831	5	+	Hordeum vulgare	MeJA-responsiveness
Potri.018G084300.1	G-box	CACGTC	1089	6	-	Zea mays	light responsive element
Potri.018G084300.1	ARE	AAACCA	53	6	+	Zea mays	anaerobic induction
Potri.018G084300.1	ARE	AAACCA	1024	6	-	Zea mays	anaerobic induction
Potri.018G084300.1	GT1-motif	GGTTAAT	1788	7	-	Avena sativa	light responsive element
Potri.018G084300.1	GT1-motif	GGTTAA	1789	6	-	Arabidopsis thaliana	light responsive element
Potri.018G084300.1	LAMP-element	CTTTATCA	41	8	-	Pisum sativum	light responsive element
Potri.018G084300.1	ABRE	ACGTG	1090	5	+	Arabidopsis thaliana	abscisic acid responsiveness
Potri.018G094800.1	G-box	CACGAC	1307	6	+	Zea mays	light responsive element
Potri.018G094800.1	G-Box	CACGTT	32	6	-	Pisum sativum	light responsive element
Potri.018G094800.1	GT1-motif	GGTTAA	1302	6	-	Arabidopsis thaliana	light responsive element
Potri.018G094800.1	ARE	AAACCA	340	6	-	Zea mays	anaerobic induction
Potri.018G094800.1	CAT-box	GCCACT	612	6	-	Arabidopsis thaliana	meristem expression
Potri.018G094800.1	ABRE	ACGTG	33	5	+	Arabidopsis thaliana	abscisic acid responsiveness
Potri.018G094800.1	TGA-element	AACGAC	1540	6	+	Brassica oleracea	auxin responsiveness
Potri.018G094800.1	TATC-box	TATCCCA	420	7	-	Oryza sativa	gibberellin-responsive element
Potri.018G094800.1	ATCT-motif	AATCTAATCC	1686	9	-	Pisum sativum	light responsive element
Potri.018G094800.1	TC-rich repeats	GTTTTCTTAC	1477	9	+	Nicotiana tabacum	defense and stress responsiveness
Potri.018G094800.1	TC-rich repeats	ATTCTCTAAC	1762	9	-	Nicotiana tabacum	defense and stress responsiveness
Potri.018G094800.1	TGACG-motif	TGACG	109	5	+	Hordeum vulgare	MeJA-responsiveness
Potri.018G094800.1	TGACG-motif	TGACG	861	5	+	Hordeum vulgare	MeJA-responsiveness
Potri.018G094800.1	TGACG-motif	TGACG	1698	5	-	Hordeum vulgare	MeJA-responsiveness
Potri.018G094800.1	Box 4	ATTAAT	352	6	+	Petroselinum crispum	light responsive element
Potri.018G094800.1	Box 4	ATTAAT	402	6	+	Petroselinum crispum	light responsive element
Potri.018G094800.1	Box 4	ATTAAT	574	6	+	Petroselinum crispum	light responsive element
Potri.018G094800.1	Box 4	ATTAAT	914	6	+	Petroselinum crispum	light responsive element
Potri.018G094800.1	CGTCA-motif	CGTCA	109	5	-	Hordeum vulgare	MeJA-responsiveness
Potri.018G094800.1	CGTCA-motif	CGTCA	861	5	-	Hordeum vulgare	MeJA-responsiveness
Potri.018G094800.1	CGTCA-motif	CGTCA	1698	5	+	Hordeum vulgare	MeJA-responsiveness
Potri.018G094900.1	Box 4	ATTAAT	212	6	+	Petroselinum crispum	light responsive element
Potri.018G094900.1	Box 4	ATTAAT	385	6	+	Petroselinum crispum	light responsive element
Potri.018G094900.1	Box 4	ATTAAT	572	6	+	Petroselinum crispum	light responsive element
Potri.018G094900.1	Box 4	ATTAAT	660	6	+	Petroselinum crispum	light responsive element
Potri.018G094900.1	Box 4	ATTAAT	741	6	+	Petroselinum crispum	light responsive element
Potri.018G094900.1	Box 4	ATTAAT	1565	6	-	Petroselinum crispum	light responsive element
Potri.018G094900.1	G-box	CACGTC	1150	6	-	Zea mays	light responsive element
Potri.018G094900.1	GC-motif	CCCCCG	23	6	+	Zea mays	anoxic specific inducibility
Potri.018G094900.1	GC-motif	CCCCCG	1513	6	-	Zea mays	anoxic specific inducibility
Potri.018G094900.1	MBS	CAACTG	1840	6	-	Arabidopsis thaliana	drought-inducibility
Potri.018G094900.1	ARE	AAACCA	1251	6	-	Zea mays	anaerobic induction
Potri.018G094900.1	ARE	AAACCA	1410	6	-	Zea mays	anaerobic induction
Potri.018G094900.1	ARE	AAACCA	1534	6	-	Zea mays	anaerobic induction
Potri.018G094900.1	ARE	AAACCA	1975	6	+	Zea mays	anaerobic induction
Potri.018G094900.1	TCT-motif	TCTTAC	1156	6	-	Arabidopsis thaliana	light responsive element
Potri.018G094900.1	GT1-motif	GGTTAA	375	6	-	Arabidopsis thaliana	light responsive element
Potri.018G094900.1	GT1-motif	GGTTAA	619	6	-	Arabidopsis thaliana	light responsive element
Potri.018G094900.1	ABRE	CGTACGTGCA	271	9	-	Hordeum vulgare	abscisic acid responsiveness
Potri.018G094900.1	ABRE	ACGTG	1151	5	+	Arabidopsis thaliana	abscisic acid responsiveness
Potri.018G095100.1	CGTCA-motif	CGTCA	713	5	-	Hordeum vulgare	MeJA-responsiveness
Potri.018G095100.1	chs-CMA2a	TCACTTGA	471	8	+	Petroselinum crispum	light responsive element
Potri.018G095100.1	Box 4	ATTAAT	766	6	+	Petroselinum crispum	light responsive element
Potri.018G095100.1	Box 4	ATTAAT	1070	6	-	Petroselinum crispum	light responsive element
Potri.018G095100.1	L-box	ATCCCACCTAC	1932	10	+	Petroselinum crispum	light responsive element
Potri.018G095100.1	I-box	gGATAAGGTG	111	9	-	Zea mays	light responsive element
Potri.018G095100.1	TCA-element	CCATCTTTTT	411	9	-	Nicotiana tabacum	light responsive element
Potri.018G095100.1	GARE-motif	TCTGTTG	531	7	-	Brassica oleracea	gibberellin-responsive element
Potri.018G095100.1	TGACG-motif	TGACG	713	5	+	Hordeum vulgare	MeJA-responsiveness
Potri.018G095100.1	ATCT-motif	AATCTAATCC	1489	9	-	Pisum sativum	light responsive element
Potri.018G095100.1	GA-motif	ATAGATAA	1479	8	-	Arabidopsis thaliana	light responsive element
Potri.018G095100.1	ABRE	AACCCGG	464	7	+	Arabidopsis thaliana	abscisic acid responsiveness
Potri.018G095100.1	ABRE	ACGTG	856	5	-	Arabidopsis thaliana	abscisic acid responsiveness
Potri.018G095100.1	MBS	CAACTG	1049	6	+	Arabidopsis thaliana	drought-inducibility
Potri.018G095100.1	TCT-motif	TCTTAC	1808	6	+	Arabidopsis thaliana	light responsive element
Potri.018G095100.1	GATA-motif	GATAGGG	113	7	-	Pisum sativum	light responsive element
Potri.018G095100.1	G-box	CACGTC	856	6	+	Zea mays	light responsive element
Potri.018G095200.1	TGACG-motif	TGACG	631	5	+	Hordeum vulgare	MeJA-responsiveness
Potri.018G095200.1	TGACG-motif	TGACG	1680	5	+	Hordeum vulgare	MeJA-responsiveness
Potri.018G095200.1	L-box	ATCCCACCTAC	1932	11	+	Petroselinum crispum	light responsive element
Potri.018G095200.1	Box 4	ATTAAT	490	6	+	Petroselinum crispum	light responsive element
Potri.018G095200.1	Box 4	ATTAAT	762	6	+	Petroselinum crispum	light responsive element
Potri.018G095200.1	Box 4	ATTAAT	823	6	+	Petroselinum crispum	light responsive element
Potri.018G095200.1	Box 4	ATTAAT	1034	6	-	Petroselinum crispum	light responsive element
Potri.018G095200.1	Box 4	ATTAAT	1463	6	-	Petroselinum crispum	light responsive element
Potri.018G095200.1	CGTCA-motif	CGTCA	631	5	-	Hordeum vulgare	MeJA-responsiveness
Potri.018G095200.1	CGTCA-motif	CGTCA	1680	5	-	Hordeum vulgare	MeJA-responsiveness
Potri.018G095200.1	G-Box	CACGTT	238	6	+	Pisum sativum	light responsive element
Potri.018G095200.1	GATA-motif	AAGATAAGATT	85	10	+	Arabidopsis thaliana	light responsive element
Potri.018G095200.1	TCT-motif	TCTTAC	1808	6	+	Arabidopsis thaliana	light responsive element
Potri.018G095200.1	ARE	AAACCA	519	6	+	Zea mays	anaerobic induction
Potri.018G095200.1	ARE	AAACCA	1090	6	-	Zea mays	anaerobic induction
Potri.018G095200.1	MBS	CAACTG	1531	6	+	Arabidopsis thaliana	drought-inducibility
Potri.018G095200.1	ABRE	ACGTG	238	5	-	Arabidopsis thaliana	abscisic acid responsiveness
Potri.019G125000.1	O2-site	GATGA(C/T)(A/G)TG(A/G)	670	8	+	Zea mays	zein metabolism regulation
Potri.019G125000.1	O2-site	GATGACATGG	1022	9	+	Zea mays	zein metabolism regulation
Potri.019G125000.1	AT1-motif	AATTATTTTTTATT	387	13	+	Solanum tuberosum	light responsive element
Potri.019G125000.1	CGTCA-motif	CGTCA	672	5	-	Hordeum vulgare	MeJA-responsiveness
Potri.019G125000.1	CGTCA-motif	CGTCA	1772	5	-	Hordeum vulgare	MeJA-responsiveness
Potri.019G125000.1	CGTCA-motif	CGTCA	1792	5	-	Hordeum vulgare	MeJA-responsiveness
Potri.019G125000.1	chs-CMA1a	TTACTTAA	252	8	-	Daucus carota	light responsive element
Potri.019G125000.1	P-box	CCTTTTG	883	7	+	Oryza sativa	gibberellin-responsive element
Potri.019G125000.1	Box 4	ATTAAT	55	6	+	Petroselinum crispum	light responsive element
Potri.019G125000.1	Box 4	ATTAAT	408	6	+	Petroselinum crispum	light responsive element
Potri.019G125000.1	Box 4	ATTAAT	624	6	+	Petroselinum crispum	light responsive element
Potri.019G125000.1	Box 4	ATTAAT	1353	6	-	Petroselinum crispum	light responsive element
Potri.019G125000.1	Box 4	ATTAAT	1357	6	-	Petroselinum crispum	light responsive element
Potri.019G125000.1	Box 4	ATTAAT	1664	6	-	Petroselinum crispum	light responsive element
Potri.019G125000.1	TC-rich repeats	GTTTTCTTAC	1302	9	+	Nicotiana tabacum	defense and stress responsiveness
Potri.019G125000.1	TC-rich repeats	ATTCTCTAAC	1786	9	+	Nicotiana tabacum	defense and stress responsiveness
Potri.019G125000.1	ATCT-motif	AATCTAATCC	164	9	-	Pisum sativum	light responsive element
Potri.019G125000.1	LTR	CCGAAA	1903	6	-	Hordeum vulgare	low-temperature responsiveness
Potri.019G125000.1	TGACG-motif	TGACG	672	5	+	Hordeum vulgare	MeJA-responsiveness
Potri.019G125000.1	TGACG-motif	TGACG	1772	5	+	Hordeum vulgare	MeJA-responsiveness
Potri.019G125000.1	TGACG-motif	TGACG	1792	5	+	Hordeum vulgare	MeJA-responsiveness
Potri.019G125000.1	AE-box	AGAAACTT	654	8	-	Arabidopsis thaliana	light responsive element
Potri.019G125000.1	AE-box	AGAAACTT	1211	8	+	Arabidopsis thaliana	light responsive element
Potri.019G125000.1	MRE	AACCTAA	1495	7	+	Petroselinum crispum	light responsive element
Potri.019G125000.1	TATC-box	TATCCCA	1777	7	-	Oryza sativa	gibberellin-responsive element
Potri.019G125000.1	ABRE	ACGTG	503	5	+	Arabidopsis thaliana	abscisic acid responsiveness
Potri.019G125000.1	ABRE	ACGTG	674	5	+	Arabidopsis thaliana	abscisic acid responsiveness
Potri.019G125000.1	ABRE	GACACGTGGC	842	9	-	Triticum aestivum	abscisic acid responsiveness
Potri.019G125000.1	ABRE	ACGTG	844	5	-	Arabidopsis thaliana	abscisic acid responsiveness
Potri.019G125000.1	ABRE	ACGTG	1014	5	+	Arabidopsis thaliana	abscisic acid responsiveness
Potri.019G125000.1	ABRE	ACGTG	1111	5	+	Arabidopsis thaliana	abscisic acid responsiveness
Potri.019G125000.1	ABRE	ACGTG	1774	5	+	Arabidopsis thaliana	abscisic acid responsiveness
Potri.019G125000.1	ABRE	ACGTG	1794	5	+	Arabidopsis thaliana	abscisic acid responsiveness
Potri.019G125000.1	ARE	AAACCA	1096	6	+	Zea mays	anaerobic induction
Potri.019G125000.1	GT1-motif	GGTTAAT	67	7	+	Avena sativa	light responsive element
Potri.019G125000.1	GT1-motif	GGTTAA	1489	6	-	Arabidopsis thaliana	light responsive element
Potri.019G125000.1	MBS	CAACTG	809	6	+	Arabidopsis thaliana	drought-inducibility
Potri.019G125000.1	G-Box	CACGTT	502	6	-	Pisum sativum	light responsive element
Potri.019G125000.1	G-Box	CACGTT	844	6	+	Pisum sativum	light responsive element
Potri.019G125000.1	G-Box	CACGTT	1013	6	-	Pisum sativum	light responsive element
Potri.019G125000.1	G-Box	CACGTT	1110	6	-	Pisum sativum	light responsive element
Potri.019G125000.1	G-box	CACGTC	673	6	-	Zea mays	light responsive element
Potri.019G125000.1	G-box	tgACACGTGGCA	841	11	-	Lycopersicon esculentum	light responsive element
Potri.019G125000.1	G-box	CACGTC	1773	6	-	Zea mays	light responsive element
Potri.019G125000.1	G-box	CACGTC	1793	6	-	Zea mays	light responsive element
Potri.T112300.1	P-box	CCTTTTG	1605	7	+	Oryza sativa	gibberellin-responsive element
Potri.T112300.1	TCA-element	CCATCTTTTT	1422	9	+	Nicotiana tabacum	light responsive element
Potri.T112300.1	Box 4	ATTAAT	53	6	+	Petroselinum crispum	light responsive element
Potri.T112300.1	Box 4	ATTAAT	1007	6	-	Petroselinum crispum	light responsive element
Potri.T112300.1	Box 4	ATTAAT	1970	6	-	Petroselinum crispum	light responsive element
Potri.T112300.1	CGTCA-motif	CGTCA	690	5	-	Hordeum vulgare	MeJA-responsiveness
Potri.T112300.1	CGTCA-motif	CGTCA	734	5	-	Hordeum vulgare	MeJA-responsiveness
Potri.T112300.1	O2-site	GATGA(C/T)(A/G)TG(A/G)	510	8	-	Zea mays	zein metabolism regulation
Potri.T112300.1	MRE	AACCTAA	813	7	+	Petroselinum crispum	light responsive element
Potri.T112300.1	AE-box	AGAAACTT	346	8	-	Arabidopsis thaliana	light responsive element
Potri.T112300.1	TGACG-motif	TGACG	690	5	+	Hordeum vulgare	MeJA-responsiveness
Potri.T112300.1	TGACG-motif	TGACG	734	5	+	Hordeum vulgare	MeJA-responsiveness
Potri.T112300.1	ABRE	ACGTG	453	5	+	Arabidopsis thaliana	abscisic acid responsiveness
Potri.T112300.1	ABRE	ACGTG	504	5	+	Arabidopsis thaliana	abscisic acid responsiveness
Potri.T112300.1	ABRE	CACGTG	1377	6	-	Arabidopsis thaliana	abscisic acid responsiveness
Potri.T112300.1	ABRE	ACGTG	1378	5	+	Arabidopsis thaliana	abscisic acid responsiveness
Potri.T112300.1	ABRE	ACGTG	1837	5	+	Arabidopsis thaliana	abscisic acid responsiveness
Potri.T112300.1	ABRE	ACGTG	1981	5	-	Arabidopsis thaliana	abscisic acid responsiveness
Potri.T112300.1	GATA-motif	GATAGGA	1015	7	-	Arabidopsis thaliana	light responsive element
Potri.T112300.1	G-Box	CACGTG	1377	6	-	Pisum sativum	light responsive element
Potri.T112300.1	G-Box	CACGTT	1836	6	-	Pisum sativum	light responsive element
Potri.T112300.1	G-Box	CACGTT	1981	6	+	Pisum sativum	light responsive element
Potri.T112300.1	G-box	CACGTC	452	6	-	Zea mays	light responsive element
Potri.T112300.1	G-box	CACGTC	503	6	-	Zea mays	light responsive element
Potri.T112300.1	G-box	CACGTG	1377	6	-	Arabidopsis thaliana	light responsive element
Potri.T112300.1	CAT-box	GCCACT	740	6	-	Arabidopsis thaliana	meristem expression
Potri.T112300.1	LAMP-element	CTTTATCA	1502	8	-	Pisum sativum	light responsive element
Potri.T112300.1	ARE	AAACCA	368	6	+	Zea mays	anaerobic induction
Potri.T112300.1	ARE	AAACCA	802	6	-	Zea mays	anaerobic induction
Potri.T112300.1	ARE	AAACCA	1367	6	+	Zea mays	anaerobic induction
Potri.T112300.1	TCT-motif	TCTTAC	748	6	+	Arabidopsis thaliana	light responsive element
Potri.T112300.1	TCT-motif	TCTTAC	1792	6	-	Arabidopsis thaliana	light responsive element
Potri.T112300.1	GT1-motif	GGTTAAT	1624	7	-	Avena sativa	light responsive element
Potri.T112300.1	GT1-motif	GGTTAA	1625	6	-	Arabidopsis thaliana	light responsive element
Potri.T112300.1	GT1-motif	GGTTAAT	1713	7	+	Avena sativa	light responsive element
Potri.T112300.1	GT1-motif	GGTTAA	1950	6	-	Arabidopsis thaliana	light responsive element
Potri.T112400.1	MRE	AACCTAA	1204	7	-	Petroselinum crispum	light responsive element
Potri.T112400.1	TC-rich repeats	GTTTTCTTAC	1186	9	-	Nicotiana tabacum	defense and stress responsiveness
Potri.T112400.1	TGACG-motif	TGACG	1006	5	+	Hordeum vulgare	MeJA-responsiveness
Potri.T112400.1	TCA-element	TCAGAAGAGG	620	9	+	Brassica oleracea	light responsive element
Potri.T112400.1	TCA-element	CCATCTTTTT	1761	9	+	Nicotiana tabacum	light responsive element
Potri.T112400.1	TCA-element	CCATCTTTTT	1900	9	+	Nicotiana tabacum	light responsive element
Potri.T112400.1	I-box	cCATATCCAAT	892	10	-	Flaveria trinervia	light responsive element
Potri.T112400.1	CGTCA-motif	CGTCA	1006	5	-	Hordeum vulgare	MeJA-responsiveness
Potri.T112400.1	GC-motif	CCCCCG	1122	6	-	Zea mays	anoxic specific inducibility
Potri.T112400.1	G-Box	CACGTG	1347	6	-	Pisum sativum	light responsive element
Potri.T112400.1	G-box	TACGTG	1295	6	+	Arabidopsis thaliana	light responsive element
Potri.T112400.1	G-box	ACACGTGT	1346	8	-	Brassica napus	light responsive element
Potri.T112400.1	G-box	CACGTG	1347	6	-	Arabidopsis thaliana	light responsive element
Potri.T112400.1	ACE	GACACGTATG	1345	9	+	Petroselinum crispum	light responsive element
Potri.T112400.1	GT1-motif	GTGTGTGAA	678	9	+	Solanum tuberosum	light responsive element
Potri.T112400.1	GT1-motif	GGTTAA	1928	6	+	Arabidopsis thaliana	light responsive element
Potri.T112400.1	TCT-motif	TCTTAC	474	6	-	Arabidopsis thaliana	light responsive element
Potri.T112400.1	TCT-motif	TCTTAC	599	6	+	Arabidopsis thaliana	light responsive element
Potri.T112400.1	TCT-motif	TCTTAC	1186	6	-	Arabidopsis thaliana	light responsive element
Potri.T112400.1	ARE	AAACCA	1516	6	-	Zea mays	anaerobic induction
Potri.T112400.1	ARE	AAACCA	1858	6	-	Zea mays	anaerobic induction
Potri.T112400.1	ABRE	ACGTG	1296	5	+	Arabidopsis thaliana	abscisic acid responsiveness
Potri.T112400.1	ABRE	CGCACGTGTC	1345	9	-	Hordeum vulgare	abscisic acid responsiveness
Potri.T112400.1	ABRE	CACGTG	1347	6	-	Arabidopsis thaliana	abscisic acid responsiveness
Potri.T112400.1	ABRE	ACGTG	1348	5	+	Arabidopsis thaliana	abscisic acid responsiveness
Potri.T112400.1	TCCC-motif	TCTCCCT	1139	7	-	Spinacia oleracea	light responsive element
Potri.T112400.1	MSA-like	TCAAACGGT	1179	9	+	Catharanthus roseus	cell cycle regulation
Potri.T112400.1	TGA-element	AACGAC	1937	6	-	Brassica oleracea	auxin responsiveness
Potri.T180200.1	LTR	CCGAAA	167	6	+	Hordeum vulgare	low-temperature responsiveness
Potri.T180200.1	LTR	CCGAAA	488	6	-	Hordeum vulgare	low-temperature responsiveness
Potri.T180200.1	LTR	CCGAAA	1245	6	-	Hordeum vulgare	low-temperature responsiveness
Potri.T180200.1	TGACG-motif	TGACG	1461	5	+	Hordeum vulgare	MeJA-responsiveness
Potri.T180200.1	GA-motif	ATAGATAA	1690	8	+	Arabidopsis thaliana	light responsive element
Potri.T180200.1	CGTCA-motif	CGTCA	1461	5	-	Hordeum vulgare	MeJA-responsiveness
Potri.T180200.1	AT1-motif	AATTATTTTTTATT	1153	13	-	Solanum tuberosum	light responsive element
Potri.T180200.1	Box 4	ATTAAT	833	6	+	Petroselinum crispum	light responsive element
Potri.T180200.1	Box 4	ATTAAT	879	6	+	Petroselinum crispum	light responsive element
Potri.T180200.1	Box 4	ATTAAT	1637	6	-	Petroselinum crispum	light responsive element
Potri.T180200.1	Box 4	ATTAAT	1795	6	-	Petroselinum crispum	light responsive element
Potri.T180200.1	I-box	TAGATAACC	1691	9	+	Pisum sativum	light responsive element
Potri.T180200.1	TCA-element	TCAGAAGAGG	152	9	+	Brassica oleracea	light responsive element
Potri.T180200.1	TCA-element	CCATCTTTTT	214	9	-	Nicotiana tabacum	light responsive element
Potri.T180200.1	Sp1	GGGCGG	706	6	-	Oryza sativa	light responsive element
Potri.T180200.1	CAT-box	GCCACT	193	6	-	Arabidopsis thaliana	meristem expression
Potri.T180200.1	ARE	AAACCA	555	6	-	Zea mays	anaerobic induction
Potri.T180200.1	GT1-motif	GGTTAA	1434	6	-	Arabidopsis thaliana	light responsive element
Potri.T180200.1	GATA-motif	AAGATAAGATT	143	10	+	Arabidopsis thaliana	light responsive element
Potri.T180200.1	GATA-motif	GATAGGG	1576	7	-	Pisum sativum	light responsive element
Potri.T180200.1	G-box	TACGTG	1306	6	-	Arabidopsis thaliana	light responsive element
Potri.T180200.1	ACE	CTAACGTATT	1119	9	-	Petroselinum crispum	light responsive element
Potri.T180200.1	TGA-element	AACGAC	1274	6	-	Brassica oleracea	auxin responsiveness
Potri.T180200.1	circadian	CAAAGATATC	1963	9	+	Lycopersicon esculentum	circadian control
Potri.T180200.1	ABRE	ACGTG	1306	5	-	Arabidopsis thaliana	abscisic acid responsiveness

## Sheet: Sheet3
Potri.001G071000.1	1162	1152	1172	1177	light responsive element
Potri.001G071000.1	1230	1220	1240	1245	MeJA-responsiveness
Potri.001G071000.1	1262	1252	1272	1277	MeJA-responsiveness
Potri.001G071000.1	58	48	68	73	light responsive element
Potri.001G071000.1	552	542	562	567	light responsive element
Potri.001G071000.1	15	5	25	30	auxin responsiveness
Potri.001G071000.1	1230	1220	1240	1245	MeJA-responsiveness
Potri.001G071000.1	1262	1252	1272	1277	MeJA-responsiveness
Potri.001G071000.1	1144	1134	1154	1159	light responsive element
Potri.001G071000.1	42	32	52	57	gibberellin-responsive element
Potri.001G071000.1	440	430	450	455	gibberellin-responsive element
Potri.001G071000.1	1123	1113	1133	1138	gibberellin-responsive element
Potri.001G071000.1	531	521	541	546	light responsive element
Potri.001G071000.1	289	279	299	304	anaerobic induction
Potri.001G071000.1	1353	1343	1363	1368	anaerobic induction
Potri.001G071000.1	1792	1782	1802	1807	anaerobic induction
Potri.001G071000.1	463	453	473	478	light responsive element
Potri.001G071000.1	975	965	985	990	light responsive element
Potri.001G071000.1	352	342	362	367	drought-inducibility
Potri.001G071000.1	128	118	138	143	anoxic specific inducibility
Potri.001G071000.1	1752	1742	1762	1767	anoxic specific inducibility
Potri.001G071000.1	100	90	110	115	light responsive element
Potri.001G071000.1	1391	1381	1401	1406	circadian control
Potri.001G071000.1	1431	1421	1441	1446	wound-responsive element
Potri.001G071000.1	176	166	186	191	auxin responsiveness
Potri.001G071000.1	100	90	110	115	abscisic acid responsiveness
Potri.001G136100.1	756	746	766	771	light responsive element
Potri.001G136100.1	1510	1500	1520	1525	light responsive element
Potri.001G136100.1	1777	1767	1787	1792	MeJA-responsiveness
Potri.001G136100.1	782	772	792	797	light responsive element
Potri.001G136100.1	1212	1202	1222	1227	light responsive element
Potri.001G136100.1	1640	1630	1650	1655	light responsive element
Potri.001G136100.1	1777	1767	1787	1792	MeJA-responsiveness
Potri.001G136100.1	1281	1271	1291	1296	gibberellin-responsive element
Potri.001G136100.1	125	115	135	140	light responsive element
Potri.001G136100.1	739	729	749	754	light responsive element
Potri.001G136100.1	894	884	904	909	light responsive element
Potri.001G136100.1	1064	1054	1074	1079	light responsive element
Potri.001G136100.1	1681	1671	1691	1696	light responsive element
Potri.001G136100.1	206	196	216	221	light responsive element
Potri.001G136100.1	140	130	150	155	anaerobic induction
Potri.001G136100.1	429	419	439	444	anaerobic induction
Potri.001G136100.1	911	901	921	926	anaerobic induction
Potri.001G136100.1	1377	1367	1387	1392	light responsive element
Potri.001G136100.1	1766	1756	1776	1781	meristem expression
Potri.001G136100.1	1095	1085	1105	1110	light responsive element
Potri.001G136100.1	1650	1640	1660	1665	drought-inducibility
Potri.001G136100.1	298	288	308	313	light responsive element
Potri.001G136100.1	167	157	177	182	light responsive element
Potri.001G136100.1	412	402	422	427	light responsive element
Potri.001G136100.1	1883	1873	1893	1898	light responsive element
Potri.001G136100.1	1890	1880	1900	1905	light responsive element
Potri.001G136100.1	68	58	78	83	auxin responsiveness
Potri.001G136100.1	273	263	283	288	auxin responsiveness
Potri.001G136100.1	1827	1817	1837	1842	auxin responsiveness
Potri.001G136100.1	1880	1870	1890	1895	light responsive element
Potri.001G136100.1	299	289	309	314	abscisic acid responsiveness
Potri.002G060400.1	115	105	125	130	seed-specific regulation
Potri.002G060400.1	206	196	216	221	low-temperature responsiveness
Potri.002G060400.1	198	188	208	213	light responsive element
Potri.002G060400.1	225	215	235	240	light responsive element
Potri.002G060400.1	233	223	243	248	light responsive element
Potri.002G060400.1	442	432	452	457	light responsive element
Potri.002G060400.1	811	801	821	826	light responsive element
Potri.002G060400.1	999	989	1009	1014	light responsive element
Potri.002G060400.1	1081	1071	1091	1096	light responsive element
Potri.002G060400.1	1111	1101	1121	1126	light responsive element
Potri.002G060400.1	1134	1124	1144	1149	light responsive element
Potri.002G060400.1	1796	1786	1806	1811	light responsive element
Potri.002G060400.1	1743	1733	1753	1758	gibberellin-responsive element
Potri.002G060400.1	1890	1880	1900	1905	gibberellin-responsive element
Potri.002G060400.1	1529	1519	1539	1544	light responsive element
Potri.002G060400.1	723	713	733	738	zein metabolism regulation
Potri.002G060400.1	892	882	902	907	light responsive element
Potri.002G060400.1	973	963	983	988	light responsive element
Potri.002G060400.1	1122	1112	1132	1137	light responsive element
Potri.002G060400.1	1959	1949	1969	1974	light responsive element
Potri.002G060400.1	1980	1970	1990	1995	light responsive element
Potri.002G060400.1	1623	1613	1633	1638	drought-inducibility
Potri.002G060400.1	638	628	648	653	meristem expression
Potri.002G060400.1	267	257	277	282	light responsive element
Potri.002G060400.1	1330	1320	1340	1345	anaerobic induction
Potri.002G060400.1	1472	1462	1482	1487	anaerobic induction
Potri.002G060400.1	1538	1528	1548	1553	anaerobic induction
Potri.002G060400.1	1683	1673	1693	1698	anaerobic induction
Potri.002G060400.1	1786	1776	1796	1801	light responsive element
Potri.002G060400.1	1977	1967	1987	1992	light responsive element
Potri.002G060500.1	420	410	430	435	circadian control
Potri.002G060500.1	1511	1501	1521	1526	abscisic acid responsiveness
Potri.002G060500.1	118	108	128	133	anaerobic induction
Potri.002G060500.1	201	191	211	216	anaerobic induction
Potri.002G060500.1	510	500	520	525	light responsive element
Potri.002G060500.1	803	793	813	818	light responsive element
Potri.002G060500.1	804	794	814	819	light responsive element
Potri.002G060500.1	326	316	336	341	drought-inducibility
Potri.002G060500.1	1493	1483	1503	1508	drought-inducibility
Potri.002G060500.1	247	237	257	262	meristem expression
Potri.002G060500.1	1530	1520	1540	1545	meristem expression
Potri.002G060500.1	1511	1501	1521	1526	light responsive element
Potri.002G060500.1	1169	1159	1179	1184	light responsive element
Potri.002G060500.1	951	941	961	966	light responsive element
Potri.002G060500.1	1658	1648	1668	1673	low-temperature responsiveness
Potri.002G153200.1	1017	1007	1027	1032	abscisic acid responsiveness
Potri.002G153200.1	1019	1009	1029	1034	abscisic acid responsiveness
Potri.002G153200.1	1076	1066	1086	1091	abscisic acid responsiveness
Potri.002G153200.1	1077	1067	1087	1092	abscisic acid responsiveness
Potri.002G153200.1	25	15	35	40	circadian control
Potri.002G153200.1	1019	1009	1029	1034	light responsive element
Potri.002G153200.1	1076	1066	1086	1091	light responsive element
Potri.002G153200.1	1018	1008	1028	1033	light responsive element
Potri.002G153200.1	1076	1066	1086	1091	light responsive element
Potri.002G153200.1	1966	1956	1976	1981	light responsive element
Potri.002G153200.1	776	766	786	791	light responsive element
Potri.002G153200.1	427	417	437	442	anaerobic induction
Potri.002G153200.1	733	723	743	748	anaerobic induction
Potri.002G153200.1	1212	1202	1222	1227	anaerobic induction
Potri.002G153200.1	317	307	327	332	light responsive element
Potri.002G153200.1	1694	1684	1704	1709	light responsive element
Potri.002G153200.1	1943	1933	1953	1958	light responsive element
Potri.002G153200.1	261	251	271	276	light responsive element
Potri.002G153200.1	220	210	230	235	gibberellin-responsive element
Potri.002G153200.1	244	234	254	259	light responsive element
Potri.002G153200.1	1172	1162	1182	1187	light responsive element
Potri.002G153200.1	1176	1166	1186	1191	light responsive element
Potri.002G153200.1	1951	1941	1961	1966	light responsive element
Potri.002G153200.1	274	264	284	289	light responsive element
Potri.002G153200.1	1127	1117	1137	1142	MeJA-responsiveness
Potri.002G153200.1	1127	1117	1137	1142	MeJA-responsiveness
Potri.002G153200.1	1848	1838	1858	1863	light responsive element
Potri.002G236200.1	1052	1042	1062	1067	light responsive element
Potri.002G236200.1	271	261	281	286	light responsive element
Potri.002G236200.1	509	499	519	524	light responsive element
Potri.002G236200.1	1146	1136	1156	1161	light responsive element
Potri.002G236200.1	1463	1453	1473	1478	light responsive element
Potri.002G236200.1	1584	1574	1594	1599	light responsive element
Potri.002G236200.1	56	46	66	71	light responsive element
Potri.002G236200.1	1428	1418	1438	1443	defense and stress responsiveness
Potri.002G236200.1	125	115	135	140	light responsive element
Potri.002G236200.1	711	701	721	726	cell cycle regulation
Potri.002G236200.1	935	925	945	950	light responsive element
Potri.002G236200.1	818	808	828	833	abscisic acid responsiveness
Potri.002G236200.1	1250	1240	1260	1265	abscisic acid responsiveness
Potri.002G236200.1	1968	1958	1978	1983	light responsive element
Potri.002G236200.1	877	867	887	892	drought-inducibility
Potri.002G236200.1	1400	1390	1410	1415	anaerobic induction
Potri.002G236200.1	1910	1900	1920	1925	light responsive element
Potri.002G236200.1	817	807	827	832	light responsive element
Potri.002G236200.1	1515	1505	1525	1530	light responsive element
Potri.002G236200.1	1249	1239	1259	1264	light responsive element
Potri.002G244200.1	331	321	341	346	light responsive element
Potri.002G244200.1	863	853	873	878	light responsive element
Potri.002G244200.1	1491	1481	1501	1506	light responsive element
Potri.002G244200.1	65	55	75	80	light responsive element
Potri.002G244200.1	1516	1506	1526	1531	light responsive element
Potri.002G244200.1	1137	1127	1147	1152	light responsive element
Potri.002G244200.1	1415	1405	1425	1430	light responsive element
Potri.002G244200.1	1719	1709	1729	1734	light responsive element
Potri.002G244200.1	1324	1314	1334	1339	light responsive element
Potri.002G244200.1	1185	1175	1195	1200	light responsive element
Potri.002G244200.1	674	664	684	689	drought-inducibility
Potri.002G244200.1	1919	1909	1929	1934	light responsive element
Potri.002G244200.1	686	676	696	701	light responsive element
Potri.002G244200.1	1921	1911	1931	1936	light responsive element
Potri.002G244200.1	1521	1511	1531	1536	light responsive element
Potri.002G244200.1	687	677	697	702	abscisic acid responsiveness
Potri.002G244200.1	1922	1912	1932	1937	abscisic acid responsiveness
Potri.002G244200.1	1179	1169	1189	1194	cell cycle regulation
Potri.003G097300.1	400	390	410	415	light responsive element
Potri.003G097300.1	1491	1481	1501	1506	light responsive element
Potri.003G097300.1	1006	996	1016	1021	MeJA-responsiveness
Potri.003G097300.1	1410	1400	1420	1425	light responsive element
Potri.003G097300.1	1983	1973	1993	1998	light responsive element
Potri.003G097300.1	1006	996	1016	1021	MeJA-responsiveness
Potri.003G097300.1	1747	1737	1757	1762	gibberellin-responsive element
Potri.003G097300.1	450	440	460	465	light responsive element
Potri.003G097300.1	699	689	709	714	light responsive element
Potri.003G097300.1	1878	1868	1888	1893	light responsive element
Potri.003G097300.1	1941	1931	1951	1956	light responsive element
Potri.003G097300.1	1226	1216	1236	1241	light responsive element
Potri.003G097300.1	1227	1217	1237	1242	light responsive element
Potri.003G097300.1	1226	1216	1236	1241	light responsive element
Potri.003G097300.1	1159	1149	1169	1174	meristem expression
Potri.003G097300.1	374	364	384	389	anaerobic induction
Potri.003G097300.1	951	941	961	966	anaerobic induction
Potri.003G097300.1	1685	1675	1695	1700	anaerobic induction
Potri.003G097300.1	1839	1829	1849	1854	light responsive element
Potri.003G097300.1	1986	1976	1996	2001	light responsive element
Potri.003G159700.1	1329	1319	1339	1344	light responsive element
Potri.003G159700.1	1477	1467	1487	1492	light responsive element
Potri.003G159700.1	251	241	261	266	drought-inducibility
Potri.003G159700.1	1247	1237	1257	1262	meristem expression
Potri.003G159700.1	607	597	617	622	anaerobic induction
Potri.003G159700.1	1737	1727	1747	1752	anaerobic induction
Potri.003G159700.1	258	248	268	273	light responsive element
Potri.003G159700.1	260	250	270	275	light responsive element
Potri.003G159700.1	1280	1270	1290	1295	light responsive element
Potri.003G159700.1	1363	1353	1373	1378	light responsive element
Potri.003G159700.1	1364	1354	1374	1379	light responsive element
Potri.003G159700.1	476	466	486	491	abscisic acid responsiveness
Potri.003G159700.1	1329	1319	1339	1344	abscisic acid responsiveness
Potri.003G159700.1	1330	1320	1340	1345	abscisic acid responsiveness
Potri.003G159700.1	1478	1468	1488	1493	abscisic acid responsiveness
Potri.003G159700.1	1082	1072	1092	1097	circadian control
Potri.003G159700.1	1949	1939	1959	1964	MeJA-responsiveness
Potri.003G159700.1	923	913	933	938	low-temperature responsiveness
Potri.003G159700.1	483	473	493	498	light responsive element
Potri.003G159700.1	777	767	787	792	light responsive element
Potri.003G159700.1	1587	1577	1597	1602	light responsive element
Potri.003G159700.1	1622	1612	1632	1637	light responsive element
Potri.003G159700.1	1643	1633	1653	1658	light responsive element
Potri.003G159700.1	1680	1670	1690	1695	light responsive element
Potri.003G159700.1	1949	1939	1959	1964	MeJA-responsiveness
Potri.003G159700.1	1751	1741	1761	1766	light responsive element
Potri.003G159700.1	636	626	646	651	light responsive element
Potri.003G159700.1	469	459	479	484	zein metabolism regulation
Potri.004G021000.1	1843	1833	1853	1858	anaerobic induction
Potri.004G021000.1	247	237	257	262	light responsive element
Potri.004G021000.1	407	397	417	422	light responsive element
Potri.004G021000.1	409	399	419	424	light responsive element
Potri.004G021000.1	1549	1539	1559	1564	light responsive element
Potri.004G021000.1	1253	1243	1263	1268	meristem expression
Potri.004G021000.1	1070	1060	1080	1085	drought-inducibility
Potri.004G021000.1	920	910	930	935	light responsive element
Potri.004G021000.1	1674	1664	1684	1689	light responsive element
Potri.004G021000.1	1675	1665	1685	1690	light responsive element
Potri.004G021000.1	1675	1665	1685	1690	abscisic acid responsiveness
Potri.004G021000.1	120	110	130	135	light responsive element
Potri.004G021000.1	1699	1689	1709	1714	light responsive element
Potri.004G021000.1	1551	1541	1561	1566	light responsive element
Potri.004G021000.1	1702	1692	1712	1717	light responsive element
Potri.004G021000.1	1132	1122	1142	1147	auxin responsiveness
Potri.004G021000.1	1033	1023	1043	1048	gibberellin-responsive element
Potri.004G021000.1	63	53	73	78	light responsive element
Potri.004G021000.1	263	253	273	278	light responsive element
Potri.004G021000.1	936	926	946	951	light responsive element
Potri.004G021000.1	1538	1528	1548	1553	light responsive element
Potri.004G021000.1	1668	1658	1678	1683	light responsive element
Potri.004G021000.1	1726	1716	1736	1741	light responsive element
Potri.005G007200.1	439	429	449	454	light responsive element
Potri.005G007200.1	1767	1757	1777	1782	drought-inducibility
Potri.005G007200.1	1179	1169	1189	1194	light responsive element
Potri.005G007200.1	1133	1123	1143	1148	light responsive element
Potri.005G007200.1	1579	1569	1589	1594	light responsive element
Potri.005G007200.1	872	862	882	887	anaerobic induction
Potri.005G007200.1	970	960	980	985	anaerobic induction
Potri.005G007200.1	1270	1260	1280	1285	anaerobic induction
Potri.005G007200.1	1644	1634	1654	1659	anaerobic induction
Potri.005G007200.1	1654	1644	1664	1669	anaerobic induction
Potri.005G007200.1	207	197	217	222	light responsive element
Potri.005G007200.1	1671	1661	1681	1686	light responsive element
Potri.005G007200.1	31	21	41	46	light responsive element
Potri.005G007200.1	236	226	246	251	light responsive element
Potri.005G007200.1	532	522	542	547	light responsive element
Potri.005G007200.1	536	526	546	551	light responsive element
Potri.005G007200.1	940	930	950	955	light responsive element
Potri.005G007200.1	1663	1653	1673	1678	light responsive element
Potri.005G007200.1	1579	1569	1589	1594	defense and stress responsiveness
Potri.005G007200.1	916	906	926	931	light responsive element
Potri.005G201200.1	1031	1021	1041	1046	light responsive element
Potri.005G201200.1	337	327	347	352	light responsive element
Potri.005G201200.1	1552	1542	1562	1567	light responsive element
Potri.005G201200.1	811	801	821	826	light responsive element
Potri.005G201200.1	837	827	847	852	light responsive element
Potri.005G201200.1	1345	1335	1355	1360	light responsive element
Potri.005G201200.1	1584	1574	1594	1599	anaerobic induction
Potri.005G201200.1	1571	1561	1581	1586	meristem expression
Potri.005G201200.1	19	9	29	34	drought-inducibility
Potri.005G201200.1	1617	1607	1627	1632	drought-inducibility
Potri.005G201200.1	338	328	348	353	abscisic acid responsiveness
Potri.005G201200.1	1031	1021	1041	1046	abscisic acid responsiveness
Potri.005G201200.1	1552	1542	1562	1567	abscisic acid responsiveness
Potri.005G201200.1	242	232	252	257	light responsive element
Potri.005G201200.1	521	511	531	536	light responsive element
Potri.005G201200.1	81	71	91	96	MeJA-responsiveness
Potri.005G201200.1	625	615	635	640	gibberellin-responsive element
Potri.005G201200.1	441	431	451	456	light responsive element
Potri.005G201200.1	1980	1970	1990	1995	light responsive element
Potri.005G201200.1	417	407	427	432	light responsive element
Potri.005G201200.1	1527	1517	1537	1542	light responsive element
Potri.005G201200.1	81	71	91	96	MeJA-responsiveness
Potri.006G071200.1	695	685	705	710	abscisic acid responsiveness
Potri.006G071200.1	1014	1004	1024	1029	abscisic acid responsiveness
Potri.006G071200.1	918	908	928	933	light responsive element
Potri.006G071200.1	218	208	228	233	light responsive element
Potri.006G071200.1	220	210	230	235	light responsive element
Potri.006G071200.1	1008	998	1018	1023	light responsive element
Potri.006G071200.1	1009	999	1019	1024	light responsive element
Potri.006G071200.1	1284	1274	1294	1299	light responsive element
Potri.006G071200.1	451	441	461	466	light responsive element
Potri.006G071200.1	1083	1073	1093	1098	light responsive element
Potri.006G071200.1	1268	1258	1278	1283	drought-inducibility
Potri.006G071200.1	695	685	705	710	light responsive element
Potri.006G071200.1	1014	1004	1024	1029	light responsive element
Potri.006G071200.1	694	684	704	709	zein metabolism regulation
Potri.006G071200.1	208	198	218	223	MeJA-responsiveness
Potri.006G071200.1	697	687	707	712	MeJA-responsiveness
Potri.006G071200.1	1759	1749	1769	1774	MeJA-responsiveness
Potri.006G071200.1	676	666	686	691	light responsive element
Potri.006G071200.1	961	951	971	976	light responsive element
Potri.006G071200.1	164	154	174	179	light responsive element
Potri.006G071200.1	503	493	513	518	light responsive element
Potri.006G071200.1	943	933	953	958	light responsive element
Potri.006G071200.1	996	986	1006	1011	light responsive element
Potri.006G071200.1	1459	1449	1469	1474	light responsive element
Potri.006G071200.1	1745	1735	1755	1760	light responsive element
Potri.006G071200.1	1398	1388	1408	1413	light responsive element
Potri.006G071200.1	208	198	218	223	MeJA-responsiveness
Potri.006G071200.1	697	687	707	712	MeJA-responsiveness
Potri.006G071200.1	1759	1749	1769	1774	MeJA-responsiveness
Potri.006G071200.1	1805	1795	1815	1820	low-temperature responsiveness
Potri.006G122900.1	165	155	175	180	light responsive element
Potri.006G122900.1	1333	1323	1343	1348	light responsive element
Potri.006G122900.1	902	892	912	917	light responsive element
Potri.006G122900.1	1644	1634	1654	1659	light responsive element
Potri.006G122900.1	1652	1642	1662	1667	anaerobic induction
Potri.006G122900.1	1767	1757	1777	1782	anaerobic induction
Potri.006G122900.1	38	28	48	53	light responsive element
Potri.006G122900.1	140	130	150	155	light responsive element
Potri.006G122900.1	141	131	151	156	light responsive element
Potri.006G122900.1	159	149	169	174	light responsive element
Potri.006G122900.1	682	672	692	697	light responsive element
Potri.006G122900.1	675	665	685	690	drought-inducibility
Potri.006G122900.1	1722	1712	1732	1737	drought-inducibility
Potri.006G122900.1	1890	1880	1900	1905	drought-inducibility
Potri.006G122900.1	165	155	175	180	abscisic acid responsiveness
Potri.006G122900.1	1448	1438	1458	1463	defense and stress responsiveness
Potri.006G122900.1	15	5	25	30	light responsive element
Potri.006G122900.1	1437	1427	1447	1452	light responsive element
Potri.006G122900.1	1565	1555	1575	1580	MeJA-responsiveness
Potri.006G122900.1	1102	1092	1112	1117	light responsive element
Potri.006G122900.1	57	47	67	72	light responsive element
Potri.006G122900.1	1565	1555	1575	1580	MeJA-responsiveness
Potri.006G160700.1	661	651	671	676	auxin responsiveness
Potri.006G160700.1	646	636	656	661	light responsive element
Potri.006G160700.1	851	841	861	866	meristem expression
Potri.006G160700.1	1392	1382	1402	1407	drought-inducibility
Potri.006G160700.1	466	456	476	481	light responsive element
Potri.006G160700.1	691	681	701	706	light responsive element
Potri.006G160700.1	1422	1412	1432	1437	light responsive element
Potri.006G160700.1	414	404	424	429	light responsive element
Potri.006G160700.1	415	405	425	430	light responsive element
Potri.006G160700.1	3	-7	13	18	light responsive element
Potri.006G160700.1	180	170	190	195	MeJA-responsiveness
Potri.006G160700.1	575	565	585	590	MeJA-responsiveness
Potri.006G160700.1	1474	1464	1484	1489	MeJA-responsiveness
Potri.006G160700.1	53	43	63	68	light responsive element
Potri.006G160700.1	180	170	190	195	MeJA-responsiveness
Potri.006G160700.1	575	565	585	590	MeJA-responsiveness
Potri.006G160700.1	1474	1464	1484	1489	MeJA-responsiveness
Potri.006G160700.1	223	213	233	238	gibberellin-responsive element
Potri.006G160700.1	1246	1236	1256	1261	gibberellin-responsive element
Potri.006G160700.1	462	452	472	477	defense and stress responsiveness
Potri.006G160700.1	1422	1412	1432	1437	defense and stress responsiveness
Potri.006G169900.1	1610	1600	1620	1625	light responsive element
Potri.006G169900.1	101	91	111	116	gibberellin-responsive element
Potri.006G169900.1	1705	1695	1715	1720	low-temperature responsiveness
Potri.006G169900.1	248	238	258	263	MeJA-responsiveness
Potri.006G169900.1	277	267	287	292	MeJA-responsiveness
Potri.006G169900.1	1127	1117	1137	1142	defense and stress responsiveness
Potri.006G170000.1	220	210	230	235	MeJA-responsiveness
Potri.006G170000.1	249	239	259	264	MeJA-responsiveness
Potri.006G170000.1	578	568	588	593	MeJA-responsiveness
Potri.006G170000.1	150	140	160	165	zein metabolism regulation
Potri.006G170000.1	1911	1901	1921	1926	zein metabolism regulation
Potri.006G170000.1	1610	1600	1620	1625	light responsive element
Potri.006G170000.1	73	63	83	88	gibberellin-responsive element
Potri.006G170000.1	1705	1695	1715	1720	low-temperature responsiveness
Potri.006G170000.1	220	210	230	235	MeJA-responsiveness
Potri.006G170000.1	249	239	259	264	MeJA-responsiveness
Potri.006G170000.1	578	568	588	593	MeJA-responsiveness
Potri.006G170000.1	1115	1105	1125	1130	defense and stress responsiveness
Potri.006G170100.1	1750	1740	1760	1765	abscisic acid responsiveness
Potri.006G170100.1	10	0	20	25	light responsive element
Potri.006G170100.1	31	21	41	46	light responsive element
Potri.006G170100.1	44	34	54	59	light responsive element
Potri.006G170100.1	1641	1631	1651	1656	auxin responsiveness
Potri.006G170100.1	1749	1739	1759	1764	light responsive element
Potri.006G170100.1	1438	1428	1448	1453	light responsive element
Potri.006G170100.1	1269	1259	1279	1284	anaerobic induction
Potri.006G170100.1	1738	1728	1748	1753	light responsive element
Potri.006G170100.1	1576	1566	1586	1591	drought-inducibility
Potri.006G170100.1	298	288	308	313	light responsive element
Potri.006G170100.1	1003	993	1013	1018	zein metabolism regulation
Potri.006G170100.1	1911	1901	1921	1926	zein metabolism regulation
Potri.006G170100.1	1610	1600	1620	1625	light responsive element
Potri.006G170100.1	1705	1695	1715	1720	low-temperature responsiveness
Potri.007G008500.1	1640	1630	1650	1655	low-temperature responsiveness
Potri.007G008500.1	1815	1805	1825	1830	MeJA-responsiveness
Potri.007G008500.1	1865	1855	1875	1880	light responsive element
Potri.007G008500.1	1099	1089	1109	1114	light responsive element
Potri.007G008500.1	1815	1805	1825	1830	MeJA-responsiveness
Potri.007G008500.1	1093	1083	1103	1108	light responsive element
Potri.007G008500.1	1194	1184	1204	1209	light responsive element
Potri.007G008500.1	47	37	57	62	light responsive element
Potri.007G008500.1	723	713	733	738	light responsive element
Potri.007G008500.1	1935	1925	1945	1950	light responsive element
Potri.007G008500.1	1895	1885	1905	1910	light responsive element
Potri.007G008500.1	1213	1203	1223	1228	light responsive element
Potri.007G008500.1	1795	1785	1805	1810	drought-inducibility
Potri.007G008500.1	1900	1890	1910	1915	drought-inducibility
Potri.007G008500.1	1388	1378	1398	1403	circadian control
Potri.007G008500.1	148	138	158	163	auxin responsiveness
Potri.008G138400.1	1787	1777	1797	1802	light responsive element
Potri.008G138400.1	1147	1137	1157	1162	drought-inducibility
Potri.008G138400.1	614	604	624	629	light responsive element
Potri.008G138400.1	688	678	698	703	light responsive element
Potri.008G138400.1	114	104	124	129	anaerobic induction
Potri.008G138400.1	1061	1051	1071	1076	anaerobic induction
Potri.008G138400.1	131	121	141	146	light responsive element
Potri.008G138400.1	1339	1329	1349	1354	light responsive element
Potri.008G138400.1	88	78	98	103	light responsive element
Potri.008G138400.1	268	258	278	283	light responsive element
Potri.008G138400.1	1133	1123	1143	1148	light responsive element
Potri.008G138400.1	1226	1216	1236	1241	light responsive element
Potri.008G138400.1	901	891	911	916	light responsive element
Potri.008G138400.1	989	979	999	1004	light responsive element
Potri.008G138400.1	1785	1775	1795	1800	light responsive element
Potri.008G138400.1	1306	1296	1316	1321	gibberellin-responsive element
Potri.008G138400.1	624	614	634	639	MeJA-responsiveness
Potri.008G138400.1	261	251	271	276	light responsive element
Potri.008G138400.1	458	448	468	473	light responsive element
Potri.008G138400.1	927	917	937	942	light responsive element
Potri.008G138400.1	25	15	35	40	low-temperature responsiveness
Potri.008G138400.1	1454	1444	1464	1469	low-temperature responsiveness
Potri.008G138400.1	624	614	634	639	MeJA-responsiveness
Potri.008G138400.1	1339	1329	1349	1354	defense and stress responsiveness
Potri.009G006600.1	801	791	811	816	auxin responsiveness
Potri.009G006600.1	464	454	474	479	abscisic acid responsiveness
Potri.009G006600.1	1687	1677	1697	1702	light responsive element
Potri.009G006600.1	67	57	77	82	light responsive element
Potri.009G006600.1	832	822	842	847	anaerobic induction
Potri.009G006600.1	428	418	438	443	drought-inducibility
Potri.009G006600.1	707	697	717	722	drought-inducibility
Potri.009G006600.1	1874	1864	1884	1889	drought-inducibility
Potri.009G006600.1	463	453	473	478	light responsive element
Potri.009G006600.1	1780	1770	1790	1795	zein metabolism regulation
Potri.009G006600.1	1083	1073	1093	1098	auxin responsiveness
Potri.009G006600.1	1811	1801	1821	1826	MeJA-responsiveness
Potri.009G006600.1	482	472	492	497	light responsive element
Potri.009G006600.1	1533	1523	1543	1548	light responsive element
Potri.009G006600.1	1313	1303	1323	1328	gibberellin-responsive element
Potri.009G006600.1	5	-5	15	20	light responsive element
Potri.009G006600.1	1147	1137	1157	1162	light responsive element
Potri.009G006600.1	22	12	32	37	light responsive element
Potri.009G006600.1	1811	1801	1821	1826	MeJA-responsiveness
Potri.009G006600.1	1650	1640	1660	1665	seed-specific regulation
Potri.009G006600.1	960	950	970	975	light responsive element
Potri.009G006600.1	1640	1630	1650	1655	light responsive element
Potri.009G083800.1	675	665	685	690	light responsive element
Potri.009G083800.1	1346	1336	1356	1361	light responsive element
Potri.009G083800.1	650	640	660	665	anaerobic induction
Potri.009G083800.1	1238	1228	1248	1253	anaerobic induction
Potri.009G083800.1	1680	1670	1690	1695	light responsive element
Potri.009G083800.1	940	930	950	955	light responsive element
Potri.009G083800.1	459	449	469	474	light responsive element
Potri.009G083800.1	311	301	321	326	light responsive element
Potri.009G083800.1	204	194	214	219	gibberellin-responsive element
Potri.009G083800.1	1588	1578	1598	1603	auxin responsiveness
Potri.009G083800.1	1011	1001	1021	1026	low-temperature responsiveness
Potri.009G083800.1	1293	1283	1303	1308	low-temperature responsiveness
Potri.009G083800.1	1024	1014	1034	1039	MeJA-responsiveness
Potri.009G083800.1	790	780	800	805	seed-specific regulation
Potri.009G083800.1	1024	1014	1034	1039	MeJA-responsiveness
Potri.009G083800.1	785	775	795	800	zein metabolism regulation
Potri.009G083800.1	422	412	432	437	light responsive element
Potri.010G102300.1	1840	1830	1850	1855	light responsive element
Potri.010G102300.1	1571	1561	1581	1586	MeJA-responsiveness
Potri.010G102300.1	1571	1561	1581	1586	MeJA-responsiveness
Potri.010G102300.1	860	850	870	875	light responsive element
Potri.010G102300.1	1606	1596	1616	1621	light responsive element
Potri.010G102300.1	184	174	194	199	light responsive element
Potri.010G102300.1	255	245	265	270	light responsive element
Potri.010G102300.1	1096	1086	1106	1111	light responsive element
Potri.010G102300.1	764	754	774	779	anaerobic induction
Potri.010G102300.1	796	786	806	811	anaerobic induction
Potri.010G102300.1	1106	1096	1116	1121	anaerobic induction
Potri.010G102300.1	1301	1291	1311	1316	anaerobic induction
Potri.010G102300.1	1846	1836	1856	1861	light responsive element
Potri.010G102300.1	457	447	467	472	light responsive element
Potri.010G102300.1	467	457	477	482	light responsive element
Potri.010G102300.1	1888	1878	1898	1903	light responsive element
Potri.010G102300.1	137	127	147	152	light responsive element
Potri.010G102300.1	1701	1691	1711	1716	light responsive element
Potri.010G102300.1	1759	1749	1769	1774	light responsive element
Potri.011G025800.1	418	408	428	433	anaerobic induction
Potri.011G025800.1	595	585	605	610	anaerobic induction
Potri.011G025800.1	790	780	800	805	anaerobic induction
Potri.011G025800.1	855	845	865	870	anaerobic induction
Potri.011G025800.1	1406	1396	1416	1421	anaerobic induction
Potri.011G025800.1	1501	1491	1511	1516	anaerobic induction
Potri.011G025800.1	746	736	756	761	light responsive element
Potri.011G025800.1	1086	1076	1096	1101	light responsive element
Potri.011G025800.1	1087	1077	1097	1102	light responsive element
Potri.011G025800.1	1487	1477	1497	1502	light responsive element
Potri.011G025800.1	871	861	881	886	light responsive element
Potri.011G025800.1	1043	1033	1053	1058	light responsive element
Potri.011G025800.1	1707	1697	1717	1722	light responsive element
Potri.011G025800.1	1245	1235	1255	1260	cell cycle regulation
Potri.011G025800.1	1035	1025	1045	1050	light responsive element
Potri.011G025800.1	409	399	419	424	light responsive element
Potri.011G025800.1	705	695	715	720	light responsive element
Potri.011G025800.1	712	702	722	727	light responsive element
Potri.011G025800.1	716	706	726	731	light responsive element
Potri.011G025800.1	720	710	730	735	light responsive element
Potri.011G025800.1	724	714	734	739	light responsive element
Potri.011G025800.1	543	533	553	558	light responsive element
Potri.011G077300.1	460	450	470	475	abscisic acid responsiveness
Potri.011G077300.1	511	501	521	526	abscisic acid responsiveness
Potri.011G077300.1	1381	1371	1391	1396	abscisic acid responsiveness
Potri.011G077300.1	1382	1372	1392	1397	abscisic acid responsiveness
Potri.011G077300.1	1837	1827	1847	1852	abscisic acid responsiveness
Potri.011G077300.1	1981	1971	1991	1996	abscisic acid responsiveness
Potri.011G077300.1	1023	1013	1033	1038	light responsive element
Potri.011G077300.1	1381	1371	1391	1396	light responsive element
Potri.011G077300.1	1836	1826	1846	1851	light responsive element
Potri.011G077300.1	1981	1971	1991	1996	light responsive element
Potri.011G077300.1	459	449	469	474	light responsive element
Potri.011G077300.1	510	500	520	525	light responsive element
Potri.011G077300.1	1381	1371	1391	1396	light responsive element
Potri.011G077300.1	1506	1496	1516	1521	light responsive element
Potri.011G077300.1	748	738	758	763	meristem expression
Potri.011G077300.1	1713	1703	1723	1728	light responsive element
Potri.011G077300.1	1950	1940	1960	1965	light responsive element
Potri.011G077300.1	756	746	766	771	light responsive element
Potri.011G077300.1	1792	1782	1802	1807	light responsive element
Potri.011G077300.1	375	365	385	390	anaerobic induction
Potri.011G077300.1	810	800	820	825	anaerobic induction
Potri.011G077300.1	1371	1361	1381	1386	anaerobic induction
Potri.011G077300.1	1426	1416	1436	1441	light responsive element
Potri.011G077300.1	68	58	78	83	light responsive element
Potri.011G077300.1	1015	1005	1025	1030	light responsive element
Potri.011G077300.1	1970	1960	1980	1985	light responsive element
Potri.011G077300.1	683	673	693	698	MeJA-responsiveness
Potri.011G077300.1	698	688	708	713	MeJA-responsiveness
Potri.011G077300.1	742	732	752	757	MeJA-responsiveness
Potri.011G077300.1	517	507	527	532	zein metabolism regulation
Potri.011G077300.1	353	343	363	368	light responsive element
Potri.011G077300.1	683	673	693	698	MeJA-responsiveness
Potri.011G077300.1	698	688	708	713	MeJA-responsiveness
Potri.011G077300.1	742	732	752	757	MeJA-responsiveness
Potri.011G077400.1	670	660	680	685	light responsive element
Potri.011G077400.1	1928	1918	1938	1943	light responsive element
Potri.011G077400.1	1508	1498	1518	1523	anaerobic induction
Potri.011G077400.1	1858	1848	1868	1873	anaerobic induction
Potri.011G077400.1	466	456	476	481	light responsive element
Potri.011G077400.1	591	581	601	606	light responsive element
Potri.011G077400.1	72	62	82	87	light responsive element
Potri.011G077400.1	1287	1277	1297	1302	light responsive element
Potri.011G077400.1	1338	1328	1348	1353	light responsive element
Potri.011G077400.1	1339	1329	1349	1354	light responsive element
Potri.011G077400.1	1337	1327	1347	1352	light responsive element
Potri.011G077400.1	1339	1329	1349	1354	light responsive element
Potri.011G077400.1	1937	1927	1947	1952	auxin responsiveness
Potri.011G077400.1	1171	1161	1181	1186	cell cycle regulation
Potri.011G077400.1	73	63	83	88	abscisic acid responsiveness
Potri.011G077400.1	1288	1278	1298	1303	abscisic acid responsiveness
Potri.011G077400.1	1337	1327	1347	1352	abscisic acid responsiveness
Potri.011G077400.1	1339	1329	1349	1354	abscisic acid responsiveness
Potri.011G077400.1	1340	1330	1350	1355	abscisic acid responsiveness
Potri.011G077400.1	1131	1121	1141	1146	light responsive element
Potri.011G077400.1	1272	1262	1282	1287	light responsive element
Potri.011G077400.1	998	988	1008	1013	MeJA-responsiveness
Potri.011G077400.1	1286	1276	1296	1301	MeJA-responsiveness
Potri.011G077400.1	1196	1186	1206	1211	light responsive element
Potri.011G077400.1	998	988	1008	1013	MeJA-responsiveness
Potri.011G077400.1	1286	1276	1296	1301	MeJA-responsiveness
Potri.011G077400.1	1413	1403	1423	1428	light responsive element
Potri.011G077400.1	1753	1743	1763	1768	light responsive element
Potri.011G077400.1	1900	1890	1910	1915	light responsive element
Potri.011G077400.1	884	874	894	899	light responsive element
Potri.013G005700.1	1602	1592	1612	1617	light responsive element
Potri.013G005700.1	1942	1932	1952	1957	light responsive element
Potri.013G005700.1	800	790	810	815	light responsive element
Potri.013G005700.1	1496	1486	1506	1511	light responsive element
Potri.013G005700.1	200	190	210	215	light responsive element
Potri.013G005700.1	603	593	613	618	drought-inducibility
Potri.013G005700.1	1901	1891	1911	1916	drought-inducibility
Potri.013G005700.1	1377	1367	1387	1392	light responsive element
Potri.013G005700.1	1584	1574	1594	1599	light responsive element
Potri.013G005700.1	1003	993	1013	1018	anaerobic induction
Potri.013G005700.1	800	790	810	815	abscisic acid responsiveness
Potri.013G005700.1	938	928	948	953	abscisic acid responsiveness
Potri.013G005700.1	1497	1487	1507	1512	abscisic acid responsiveness
Potri.013G005700.1	567	557	577	582	gibberellin-responsive element
Potri.013G005700.1	1704	1694	1714	1719	gibberellin-responsive element
Potri.013G005700.1	1525	1515	1535	1540	auxin responsiveness
Potri.013G005700.1	1190	1180	1200	1205	low-temperature responsiveness
Potri.013G005700.1	1566	1556	1576	1581	MeJA-responsiveness
Potri.013G005700.1	1584	1574	1594	1599	defense and stress responsiveness
Potri.013G005700.1	1649	1639	1659	1664	defense and stress responsiveness
Potri.013G005700.1	430	420	440	445	light responsive element
Potri.013G005700.1	1686	1676	1696	1701	light responsive element
Potri.013G005700.1	1796	1786	1806	1811	light responsive element
Potri.013G005700.1	414	404	424	429	light responsive element
Potri.013G005700.1	1313	1303	1323	1328	light responsive element
Potri.013G005700.1	1566	1556	1576	1581	MeJA-responsiveness
Potri.013G005700.1	1127	1117	1137	1142	zein metabolism regulation
Potri.013G005700.1	749	739	759	764	auxin responsiveness
Potri.013G152400.1	1293	1283	1303	1308	zein metabolism regulation
Potri.013G152400.1	941	931	951	956	MeJA-responsiveness
Potri.013G152400.1	1786	1776	1796	1801	MeJA-responsiveness
Potri.013G152400.1	1715	1705	1725	1730	light responsive element
Potri.013G152400.1	567	557	577	582	light responsive element
Potri.013G152400.1	726	716	736	741	light responsive element
Potri.013G152400.1	790	780	800	805	light responsive element
Potri.013G152400.1	1415	1405	1425	1430	light responsive element
Potri.013G152400.1	783	773	793	798	light responsive element
Potri.013G152400.1	1409	1399	1419	1424	light responsive element
Potri.013G152400.1	941	931	951	956	MeJA-responsiveness
Potri.013G152400.1	1786	1776	1796	1801	MeJA-responsiveness
Potri.013G152400.1	943	933	953	958	abscisic acid responsiveness
Potri.013G152400.1	1116	1106	1126	1131	abscisic acid responsiveness
Potri.013G152400.1	1118	1108	1128	1133	abscisic acid responsiveness
Potri.013G152400.1	1119	1109	1129	1134	abscisic acid responsiveness
Potri.013G152400.1	1285	1275	1295	1300	abscisic acid responsiveness
Potri.013G152400.1	1788	1778	1798	1803	abscisic acid responsiveness
Potri.013G152400.1	804	794	814	819	anaerobic induction
Potri.013G152400.1	1809	1799	1819	1824	meristem expression
Potri.013G152400.1	1083	1073	1093	1098	drought-inducibility
Potri.013G152400.1	1149	1139	1159	1164	drought-inducibility
Potri.013G152400.1	1118	1108	1128	1133	light responsive element
Potri.013G152400.1	942	932	952	957	light responsive element
Potri.013G152400.1	1115	1105	1125	1130	light responsive element
Potri.013G152400.1	1118	1108	1128	1133	light responsive element
Potri.013G152400.1	1282	1272	1292	1297	light responsive element
Potri.013G152400.1	1284	1274	1294	1299	light responsive element
Potri.013G152400.1	1787	1777	1797	1802	light responsive element
Potri.013G152400.1	782	772	792	797	light responsive element
Potri.014G115000.1	1974	1964	1984	1989	MeJA-responsiveness
Potri.014G115000.1	1989	1979	1999	2004	MeJA-responsiveness
Potri.014G115000.1	544	534	554	559	light responsive element
Potri.014G115000.1	557	547	567	572	defense and stress responsiveness
Potri.014G115000.1	1070	1060	1080	1085	defense and stress responsiveness
Potri.014G115000.1	1731	1721	1741	1746	defense and stress responsiveness
Potri.014G115000.1	407	397	417	422	light responsive element
Potri.014G115000.1	599	589	609	614	light responsive element
Potri.014G115000.1	645	635	655	660	light responsive element
Potri.014G115000.1	1362	1352	1372	1377	light responsive element
Potri.014G115000.1	131	121	141	146	light responsive element
Potri.014G115000.1	1974	1964	1984	1989	MeJA-responsiveness
Potri.014G115000.1	1989	1979	1999	2004	MeJA-responsiveness
Potri.014G115000.1	1986	1976	1996	2001	zein metabolism regulation
Potri.014G115000.1	1354	1344	1364	1369	light responsive element
Potri.014G115000.1	1420	1410	1430	1435	light responsive element
Potri.014G115000.1	1987	1977	1997	2002	light responsive element
Potri.014G115000.1	1273	1263	1283	1288	light responsive element
Potri.014G115000.1	1420	1410	1430	1435	light responsive element
Potri.014G115000.1	493	483	503	508	drought-inducibility
Potri.014G115000.1	153	143	163	168	light responsive element
Potri.014G115000.1	557	547	567	572	light responsive element
Potri.014G115000.1	1259	1249	1269	1274	light responsive element
Potri.014G115000.1	1731	1721	1741	1746	light responsive element
Potri.014G115000.1	821	811	831	836	anaerobic induction
Potri.014G115000.1	1252	1242	1262	1267	anaerobic induction
Potri.014G115000.1	1820	1810	1830	1835	anaerobic induction
Potri.014G115000.1	1313	1303	1323	1328	light responsive element
Potri.014G115000.1	1274	1264	1284	1289	abscisic acid responsiveness
Potri.014G115000.1	1420	1410	1430	1435	abscisic acid responsiveness
Potri.014G115000.1	1421	1411	1431	1436	abscisic acid responsiveness
Potri.014G115000.1	1987	1977	1997	2002	abscisic acid responsiveness
Potri.014G115000.1	360	350	370	375	auxin responsiveness
Potri.014G115000.1	395	385	405	410	circadian control
Potri.014G115000.1	1154	1144	1164	1169	circadian control
Potri.014G140300.1	796	786	806	811	drought-inducibility
Potri.014G140300.1	969	959	979	984	light responsive element
Potri.014G140300.1	1910	1900	1920	1925	anoxic specific inducibility
Potri.014G140300.1	178	168	188	193	light responsive element
Potri.014G140300.1	674	664	684	689	light responsive element
Potri.014G140300.1	1568	1558	1578	1583	light responsive element
Potri.014G140300.1	1717	1707	1727	1732	light responsive element
Potri.014G140300.1	178	168	188	193	light responsive element
Potri.014G140300.1	492	482	502	507	light responsive element
Potri.014G140300.1	494	484	504	509	light responsive element
Potri.014G140300.1	610	600	620	625	light responsive element
Potri.014G140300.1	674	664	684	689	light responsive element
Potri.014G140300.1	465	455	475	480	auxin responsiveness
Potri.014G140300.1	178	168	188	193	abscisic acid responsiveness
Potri.014G140300.1	179	169	189	194	abscisic acid responsiveness
Potri.014G140300.1	495	485	505	510	abscisic acid responsiveness
Potri.014G140300.1	611	601	621	626	abscisic acid responsiveness
Potri.014G140300.1	674	664	684	689	abscisic acid responsiveness
Potri.014G140300.1	675	665	685	690	abscisic acid responsiveness
Potri.014G140300.1	1569	1559	1579	1584	abscisic acid responsiveness
Potri.014G140300.1	1717	1707	1727	1732	abscisic acid responsiveness
Potri.014G140300.1	1957	1947	1967	1972	gibberellin-responsive element
Potri.014G140300.1	1782	1772	1792	1797	MeJA-responsiveness
Potri.014G140300.1	304	294	314	319	light responsive element
Potri.014G140300.1	417	407	427	432	light responsive element
Potri.014G140300.1	1782	1772	1792	1797	MeJA-responsiveness
Potri.014G140300.1	137	127	147	152	zein metabolism regulation
Potri.014G140300.1	848	838	858	863	zein metabolism regulation
Potri.014G140300.1	627	617	637	642	auxin responsiveness
Potri.014G140300.1	203	193	213	218	light responsive element
Potri.014G140300.1	925	915	935	940	light responsive element
Potri.014G146100.1	1369	1359	1379	1384	anoxic specific inducibility
Potri.014G146100.1	363	353	373	378	light responsive element
Potri.014G146100.1	1235	1225	1245	1250	light responsive element
Potri.014G146100.1	1236	1226	1246	1251	light responsive element
Potri.014G146100.1	728	718	738	743	light responsive element
Potri.014G146100.1	422	412	432	437	light responsive element
Potri.014G146100.1	452	442	462	467	light responsive element
Potri.014G146100.1	496	486	506	511	anaerobic induction
Potri.014G146100.1	1398	1388	1408	1413	anaerobic induction
Potri.014G146100.1	1514	1504	1524	1529	anaerobic induction
Potri.014G146100.1	1202	1192	1212	1217	light responsive element
Potri.014G146100.1	1262	1252	1272	1277	light responsive element
Potri.014G146100.1	390	380	400	405	meristem expression
Potri.014G146100.1	363	353	373	378	abscisic acid responsiveness
Potri.014G146100.1	1237	1227	1247	1252	abscisic acid responsiveness
Potri.014G146100.1	890	880	900	905	seed-specific regulation
Potri.014G146100.1	320	310	330	335	MeJA-responsiveness
Potri.014G146100.1	325	315	335	340	MeJA-responsiveness
Potri.014G146100.1	1275	1265	1285	1290	low-temperature responsiveness
Potri.014G146100.1	164	154	174	179	light responsive element
Potri.014G146100.1	217	207	227	232	light responsive element
Potri.014G146100.1	960	950	970	975	light responsive element
Potri.014G146100.1	1423	1413	1433	1438	light responsive element
Potri.014G146100.1	1457	1447	1467	1472	light responsive element
Potri.014G146100.1	1621	1611	1631	1636	light responsive element
Potri.014G146100.1	1655	1645	1665	1670	light responsive element
Potri.014G146100.1	1373	1363	1383	1388	auxin responsiveness
Potri.014G146100.1	912	902	922	927	light responsive element
Potri.014G146100.1	1138	1128	1148	1153	light responsive element
Potri.014G146100.1	320	310	330	335	MeJA-responsiveness
Potri.014G146100.1	325	315	335	340	MeJA-responsiveness
Potri.014G152700.1	1837	1827	1847	1852	light responsive element
Potri.014G152700.1	538	528	548	553	anaerobic induction
Potri.014G152700.1	1727	1717	1737	1742	anaerobic induction
Potri.014G152700.1	1753	1743	1763	1768	anaerobic induction
Potri.014G152700.1	1037	1027	1047	1052	light responsive element
Potri.014G152700.1	1402	1392	1412	1417	light responsive element
Potri.014G152700.1	1042	1032	1052	1057	light responsive element
Potri.014G152700.1	1155	1145	1165	1170	light responsive element
Potri.014G152700.1	1042	1032	1052	1057	abscisic acid responsiveness
Potri.014G152700.1	94	84	104	109	light responsive element
Potri.014G152700.1	437	427	447	452	light responsive element
Potri.014G152700.1	642	632	652	657	light responsive element
Potri.014G152700.1	937	927	947	952	light responsive element
Potri.014G152700.1	1009	999	1019	1024	light responsive element
Potri.014G152700.1	1013	1003	1023	1028	light responsive element
Potri.014G152700.1	1463	1453	1473	1478	light responsive element
Potri.016G098600.1	1188	1178	1198	1203	zein metabolism regulation
Potri.016G098600.1	88	78	98	103	MeJA-responsiveness
Potri.016G098600.1	1747	1737	1757	1762	light responsive element
Potri.016G098600.1	1288	1278	1298	1303	light responsive element
Potri.016G098600.1	1783	1773	1793	1798	defense and stress responsiveness
Potri.016G098600.1	1359	1349	1369	1374	light responsive element
Potri.016G098600.1	678	668	688	693	low-temperature responsiveness
Potri.016G098600.1	88	78	98	103	MeJA-responsiveness
Potri.016G098600.1	1464	1454	1474	1479	light responsive element
Potri.016G098600.1	1573	1563	1583	1588	light responsive element
Potri.016G098600.1	1605	1595	1615	1620	light responsive element
Potri.016G098600.1	1510	1500	1520	1525	abscisic acid responsiveness
Potri.016G098600.1	1896	1886	1906	1911	abscisic acid responsiveness
Potri.016G098600.1	1640	1630	1650	1655	light responsive element
Potri.016G098600.1	1856	1846	1866	1871	light responsive element
Potri.016G098600.1	278	268	288	293	drought-inducibility
Potri.016G098600.1	1862	1852	1872	1877	drought-inducibility
Potri.016G098600.1	1482	1472	1492	1497	light responsive element
Potri.016G098600.1	1509	1499	1519	1524	light responsive element
Potri.016G098600.1	1895	1885	1905	1910	light responsive element
Potri.016G098600.1	1896	1886	1906	1911	light responsive element
Potri.018G084300.1	1870	1860	1880	1885	light responsive element
Potri.018G084300.1	1977	1967	1987	1992	light responsive element
Potri.018G084300.1	1204	1194	1214	1219	MeJA-responsiveness
Potri.018G084300.1	1831	1821	1841	1846	MeJA-responsiveness
Potri.018G084300.1	846	836	856	861	light responsive element
Potri.018G084300.1	1412	1402	1422	1427	light responsive element
Potri.018G084300.1	349	339	359	364	light responsive element
Potri.018G084300.1	1204	1194	1214	1219	MeJA-responsiveness
Potri.018G084300.1	1831	1821	1841	1846	MeJA-responsiveness
Potri.018G084300.1	1089	1079	1099	1104	light responsive element
Potri.018G084300.1	53	43	63	68	anaerobic induction
Potri.018G084300.1	1024	1014	1034	1039	anaerobic induction
Potri.018G084300.1	1788	1778	1798	1803	light responsive element
Potri.018G084300.1	1789	1779	1799	1804	light responsive element
Potri.018G084300.1	41	31	51	56	light responsive element
Potri.018G084300.1	1090	1080	1100	1105	abscisic acid responsiveness
Potri.018G094800.1	1307	1297	1317	1322	light responsive element
Potri.018G094800.1	32	22	42	47	light responsive element
Potri.018G094800.1	1302	1292	1312	1317	light responsive element
Potri.018G094800.1	340	330	350	355	anaerobic induction
Potri.018G094800.1	612	602	622	627	meristem expression
Potri.018G094800.1	33	23	43	48	abscisic acid responsiveness
Potri.018G094800.1	1540	1530	1550	1555	auxin responsiveness
Potri.018G094800.1	420	410	430	435	gibberellin-responsive element
Potri.018G094800.1	1686	1676	1696	1701	light responsive element
Potri.018G094800.1	1477	1467	1487	1492	defense and stress responsiveness
Potri.018G094800.1	1762	1752	1772	1777	defense and stress responsiveness
Potri.018G094800.1	109	99	119	124	MeJA-responsiveness
Potri.018G094800.1	861	851	871	876	MeJA-responsiveness
Potri.018G094800.1	1698	1688	1708	1713	MeJA-responsiveness
Potri.018G094800.1	352	342	362	367	light responsive element
Potri.018G094800.1	402	392	412	417	light responsive element
Potri.018G094800.1	574	564	584	589	light responsive element
Potri.018G094800.1	914	904	924	929	light responsive element
Potri.018G094800.1	109	99	119	124	MeJA-responsiveness
Potri.018G094800.1	861	851	871	876	MeJA-responsiveness
Potri.018G094800.1	1698	1688	1708	1713	MeJA-responsiveness
Potri.018G094900.1	212	202	222	227	light responsive element
Potri.018G094900.1	385	375	395	400	light responsive element
Potri.018G094900.1	572	562	582	587	light responsive element
Potri.018G094900.1	660	650	670	675	light responsive element
Potri.018G094900.1	741	731	751	756	light responsive element
Potri.018G094900.1	1565	1555	1575	1580	light responsive element
Potri.018G094900.1	1150	1140	1160	1165	light responsive element
Potri.018G094900.1	23	13	33	38	anoxic specific inducibility
Potri.018G094900.1	1513	1503	1523	1528	anoxic specific inducibility
Potri.018G094900.1	1840	1830	1850	1855	drought-inducibility
Potri.018G094900.1	1251	1241	1261	1266	anaerobic induction
Potri.018G094900.1	1410	1400	1420	1425	anaerobic induction
Potri.018G094900.1	1534	1524	1544	1549	anaerobic induction
Potri.018G094900.1	1975	1965	1985	1990	anaerobic induction
Potri.018G094900.1	1156	1146	1166	1171	light responsive element
Potri.018G094900.1	375	365	385	390	light responsive element
Potri.018G094900.1	619	609	629	634	light responsive element
Potri.018G094900.1	271	261	281	286	abscisic acid responsiveness
Potri.018G094900.1	1151	1141	1161	1166	abscisic acid responsiveness
Potri.018G095100.1	713	703	723	728	MeJA-responsiveness
Potri.018G095100.1	471	461	481	486	light responsive element
Potri.018G095100.1	766	756	776	781	light responsive element
Potri.018G095100.1	1070	1060	1080	1085	light responsive element
Potri.018G095100.1	1932	1922	1942	1947	light responsive element
Potri.018G095100.1	111	101	121	126	light responsive element
Potri.018G095100.1	411	401	421	426	light responsive element
Potri.018G095100.1	531	521	541	546	gibberellin-responsive element
Potri.018G095100.1	713	703	723	728	MeJA-responsiveness
Potri.018G095100.1	1489	1479	1499	1504	light responsive element
Potri.018G095100.1	1479	1469	1489	1494	light responsive element
Potri.018G095100.1	464	454	474	479	abscisic acid responsiveness
Potri.018G095100.1	856	846	866	871	abscisic acid responsiveness
Potri.018G095100.1	1049	1039	1059	1064	drought-inducibility
Potri.018G095100.1	1808	1798	1818	1823	light responsive element
Potri.018G095100.1	113	103	123	128	light responsive element
Potri.018G095100.1	856	846	866	871	light responsive element
Potri.018G095200.1	631	621	641	646	MeJA-responsiveness
Potri.018G095200.1	1680	1670	1690	1695	MeJA-responsiveness
Potri.018G095200.1	1932	1922	1942	1947	light responsive element
Potri.018G095200.1	490	480	500	505	light responsive element
Potri.018G095200.1	762	752	772	777	light responsive element
Potri.018G095200.1	823	813	833	838	light responsive element
Potri.018G095200.1	1034	1024	1044	1049	light responsive element
Potri.018G095200.1	1463	1453	1473	1478	light responsive element
Potri.018G095200.1	631	621	641	646	MeJA-responsiveness
Potri.018G095200.1	1680	1670	1690	1695	MeJA-responsiveness
Potri.018G095200.1	238	228	248	253	light responsive element
Potri.018G095200.1	85	75	95	100	light responsive element
Potri.018G095200.1	1808	1798	1818	1823	light responsive element
Potri.018G095200.1	519	509	529	534	anaerobic induction
Potri.018G095200.1	1090	1080	1100	1105	anaerobic induction
Potri.018G095200.1	1531	1521	1541	1546	drought-inducibility
Potri.018G095200.1	238	228	248	253	abscisic acid responsiveness
Potri.019G125000.1	670	660	680	685	zein metabolism regulation
Potri.019G125000.1	1022	1012	1032	1037	zein metabolism regulation
Potri.019G125000.1	387	377	397	402	light responsive element
Potri.019G125000.1	672	662	682	687	MeJA-responsiveness
Potri.019G125000.1	1772	1762	1782	1787	MeJA-responsiveness
Potri.019G125000.1	1792	1782	1802	1807	MeJA-responsiveness
Potri.019G125000.1	252	242	262	267	light responsive element
Potri.019G125000.1	883	873	893	898	gibberellin-responsive element
Potri.019G125000.1	55	45	65	70	light responsive element
Potri.019G125000.1	408	398	418	423	light responsive element
Potri.019G125000.1	624	614	634	639	light responsive element
Potri.019G125000.1	1353	1343	1363	1368	light responsive element
Potri.019G125000.1	1357	1347	1367	1372	light responsive element
Potri.019G125000.1	1664	1654	1674	1679	light responsive element
Potri.019G125000.1	1302	1292	1312	1317	defense and stress responsiveness
Potri.019G125000.1	1786	1776	1796	1801	defense and stress responsiveness
Potri.019G125000.1	164	154	174	179	light responsive element
Potri.019G125000.1	1903	1893	1913	1918	low-temperature responsiveness
Potri.019G125000.1	672	662	682	687	MeJA-responsiveness
Potri.019G125000.1	1772	1762	1782	1787	MeJA-responsiveness
Potri.019G125000.1	1792	1782	1802	1807	MeJA-responsiveness
Potri.019G125000.1	654	644	664	669	light responsive element
Potri.019G125000.1	1211	1201	1221	1226	light responsive element
Potri.019G125000.1	1495	1485	1505	1510	light responsive element
Potri.019G125000.1	1777	1767	1787	1792	gibberellin-responsive element
Potri.019G125000.1	503	493	513	518	abscisic acid responsiveness
Potri.019G125000.1	674	664	684	689	abscisic acid responsiveness
Potri.019G125000.1	842	832	852	857	abscisic acid responsiveness
Potri.019G125000.1	844	834	854	859	abscisic acid responsiveness
Potri.019G125000.1	1014	1004	1024	1029	abscisic acid responsiveness
Potri.019G125000.1	1111	1101	1121	1126	abscisic acid responsiveness
Potri.019G125000.1	1774	1764	1784	1789	abscisic acid responsiveness
Potri.019G125000.1	1794	1784	1804	1809	abscisic acid responsiveness
Potri.019G125000.1	1096	1086	1106	1111	anaerobic induction
Potri.019G125000.1	67	57	77	82	light responsive element
Potri.019G125000.1	1489	1479	1499	1504	light responsive element
Potri.019G125000.1	809	799	819	824	drought-inducibility
Potri.019G125000.1	502	492	512	517	light responsive element
Potri.019G125000.1	844	834	854	859	light responsive element
Potri.019G125000.1	1013	1003	1023	1028	light responsive element
Potri.019G125000.1	1110	1100	1120	1125	light responsive element
Potri.019G125000.1	673	663	683	688	light responsive element
Potri.019G125000.1	841	831	851	856	light responsive element
Potri.019G125000.1	1773	1763	1783	1788	light responsive element
Potri.019G125000.1	1793	1783	1803	1808	light responsive element
Potri.T112300.1	1605	1595	1615	1620	gibberellin-responsive element
Potri.T112300.1	1422	1412	1432	1437	light responsive element
Potri.T112300.1	53	43	63	68	light responsive element
Potri.T112300.1	1007	997	1017	1022	light responsive element
Potri.T112300.1	1970	1960	1980	1985	light responsive element
Potri.T112300.1	690	680	700	705	MeJA-responsiveness
Potri.T112300.1	734	724	744	749	MeJA-responsiveness
Potri.T112300.1	510	500	520	525	zein metabolism regulation
Potri.T112300.1	813	803	823	828	light responsive element
Potri.T112300.1	346	336	356	361	light responsive element
Potri.T112300.1	690	680	700	705	MeJA-responsiveness
Potri.T112300.1	734	724	744	749	MeJA-responsiveness
Potri.T112300.1	453	443	463	468	abscisic acid responsiveness
Potri.T112300.1	504	494	514	519	abscisic acid responsiveness
Potri.T112300.1	1377	1367	1387	1392	abscisic acid responsiveness
Potri.T112300.1	1378	1368	1388	1393	abscisic acid responsiveness
Potri.T112300.1	1837	1827	1847	1852	abscisic acid responsiveness
Potri.T112300.1	1981	1971	1991	1996	abscisic acid responsiveness
Potri.T112300.1	1015	1005	1025	1030	light responsive element
Potri.T112300.1	1377	1367	1387	1392	light responsive element
Potri.T112300.1	1836	1826	1846	1851	light responsive element
Potri.T112300.1	1981	1971	1991	1996	light responsive element
Potri.T112300.1	452	442	462	467	light responsive element
Potri.T112300.1	503	493	513	518	light responsive element
Potri.T112300.1	1377	1367	1387	1392	light responsive element
Potri.T112300.1	740	730	750	755	meristem expression
Potri.T112300.1	1502	1492	1512	1517	light responsive element
Potri.T112300.1	368	358	378	383	anaerobic induction
Potri.T112300.1	802	792	812	817	anaerobic induction
Potri.T112300.1	1367	1357	1377	1382	anaerobic induction
Potri.T112300.1	748	738	758	763	light responsive element
Potri.T112300.1	1792	1782	1802	1807	light responsive element
Potri.T112300.1	1624	1614	1634	1639	light responsive element
Potri.T112300.1	1625	1615	1635	1640	light responsive element
Potri.T112300.1	1713	1703	1723	1728	light responsive element
Potri.T112300.1	1950	1940	1960	1965	light responsive element
Potri.T112400.1	1204	1194	1214	1219	light responsive element
Potri.T112400.1	1186	1176	1196	1201	defense and stress responsiveness
Potri.T112400.1	1006	996	1016	1021	MeJA-responsiveness
Potri.T112400.1	620	610	630	635	light responsive element
Potri.T112400.1	1761	1751	1771	1776	light responsive element
Potri.T112400.1	1900	1890	1910	1915	light responsive element
Potri.T112400.1	892	882	902	907	light responsive element
Potri.T112400.1	1006	996	1016	1021	MeJA-responsiveness
Potri.T112400.1	1122	1112	1132	1137	anoxic specific inducibility
Potri.T112400.1	1347	1337	1357	1362	light responsive element
Potri.T112400.1	1295	1285	1305	1310	light responsive element
Potri.T112400.1	1346	1336	1356	1361	light responsive element
Potri.T112400.1	1347	1337	1357	1362	light responsive element
Potri.T112400.1	1345	1335	1355	1360	light responsive element
Potri.T112400.1	678	668	688	693	light responsive element
Potri.T112400.1	1928	1918	1938	1943	light responsive element
Potri.T112400.1	474	464	484	489	light responsive element
Potri.T112400.1	599	589	609	614	light responsive element
Potri.T112400.1	1186	1176	1196	1201	light responsive element
Potri.T112400.1	1516	1506	1526	1531	anaerobic induction
Potri.T112400.1	1858	1848	1868	1873	anaerobic induction
Potri.T112400.1	1296	1286	1306	1311	abscisic acid responsiveness
Potri.T112400.1	1345	1335	1355	1360	abscisic acid responsiveness
Potri.T112400.1	1347	1337	1357	1362	abscisic acid responsiveness
Potri.T112400.1	1348	1338	1358	1363	abscisic acid responsiveness
Potri.T112400.1	1139	1129	1149	1154	light responsive element
Potri.T112400.1	1179	1169	1189	1194	cell cycle regulation
Potri.T112400.1	1937	1927	1947	1952	auxin responsiveness
Potri.T180200.1	167	157	177	182	low-temperature responsiveness
Potri.T180200.1	488	478	498	503	low-temperature responsiveness
Potri.T180200.1	1245	1235	1255	1260	low-temperature responsiveness
Potri.T180200.1	1461	1451	1471	1476	MeJA-responsiveness
Potri.T180200.1	1690	1680	1700	1705	light responsive element
Potri.T180200.1	1461	1451	1471	1476	MeJA-responsiveness
Potri.T180200.1	1153	1143	1163	1168	light responsive element
Potri.T180200.1	833	823	843	848	light responsive element
Potri.T180200.1	879	869	889	894	light responsive element
Potri.T180200.1	1637	1627	1647	1652	light responsive element
Potri.T180200.1	1795	1785	1805	1810	light responsive element
Potri.T180200.1	1691	1681	1701	1706	light responsive element
Potri.T180200.1	152	142	162	167	light responsive element
Potri.T180200.1	214	204	224	229	light responsive element
Potri.T180200.1	706	696	716	721	light responsive element
Potri.T180200.1	193	183	203	208	meristem expression
Potri.T180200.1	555	545	565	570	anaerobic induction
Potri.T180200.1	1434	1424	1444	1449	light responsive element
Potri.T180200.1	143	133	153	158	light responsive element
Potri.T180200.1	1576	1566	1586	1591	light responsive element
Potri.T180200.1	1306	1296	1316	1321	light responsive element
Potri.T180200.1	1119	1109	1129	1134	light responsive element
Potri.T180200.1	1274	1264	1284	1289	auxin responsiveness
Potri.T180200.1	1963	1953	1973	1978	circadian control
Potri.T180200.1	1306	1296	1316	1321	abscisic acid responsiveness

## Sheet: Sheet4
Potri.001G071000.1	1152	1177	light responsive element
Potri.001G071000.1	1220	1245	MeJA-responsiveness
Potri.001G071000.1	1252	1277	MeJA-responsiveness
Potri.001G071000.1	48	73	light responsive element
Potri.001G071000.1	542	567	light responsive element
Potri.001G071000.1	5	30	auxin responsiveness
Potri.001G071000.1	1220	1245	MeJA-responsiveness
Potri.001G071000.1	1252	1277	MeJA-responsiveness
Potri.001G071000.1	1134	1159	light responsive element
Potri.001G071000.1	32	57	gibberellin-responsive element
Potri.001G071000.1	430	455	gibberellin-responsive element
Potri.001G071000.1	1113	1138	gibberellin-responsive element
Potri.001G071000.1	521	546	light responsive element
Potri.001G071000.1	279	304	anaerobic induction
Potri.001G071000.1	1343	1368	anaerobic induction
Potri.001G071000.1	1782	1807	anaerobic induction
Potri.001G071000.1	453	478	light responsive element
Potri.001G071000.1	965	990	light responsive element
Potri.001G071000.1	342	367	drought-inducibility
Potri.001G071000.1	118	143	anoxic specific inducibility
Potri.001G071000.1	1742	1767	anoxic specific inducibility
Potri.001G071000.1	90	115	light responsive element
Potri.001G071000.1	1381	1406	circadian control
Potri.001G071000.1	1421	1446	wound-responsive element
Potri.001G071000.1	166	191	auxin responsiveness
Potri.001G071000.1	90	115	abscisic acid responsiveness
Potri.001G136100.1	746	771	light responsive element
Potri.001G136100.1	1500	1525	light responsive element
Potri.001G136100.1	1767	1792	MeJA-responsiveness
Potri.001G136100.1	772	797	light responsive element
Potri.001G136100.1	1202	1227	light responsive element
Potri.001G136100.1	1630	1655	light responsive element
Potri.001G136100.1	1767	1792	MeJA-responsiveness
Potri.001G136100.1	1271	1296	gibberellin-responsive element
Potri.001G136100.1	115	140	light responsive element
Potri.001G136100.1	729	754	light responsive element
Potri.001G136100.1	884	909	light responsive element
Potri.001G136100.1	1054	1079	light responsive element
Potri.001G136100.1	1671	1696	light responsive element
Potri.001G136100.1	196	221	light responsive element
Potri.001G136100.1	130	155	anaerobic induction
Potri.001G136100.1	419	444	anaerobic induction
Potri.001G136100.1	901	926	anaerobic induction
Potri.001G136100.1	1367	1392	light responsive element
Potri.001G136100.1	1756	1781	meristem expression
Potri.001G136100.1	1085	1110	light responsive element
Potri.001G136100.1	1640	1665	drought-inducibility
Potri.001G136100.1	288	313	light responsive element
Potri.001G136100.1	157	182	light responsive element
Potri.001G136100.1	402	427	light responsive element
Potri.001G136100.1	1873	1898	light responsive element
Potri.001G136100.1	1880	1905	light responsive element
Potri.001G136100.1	58	83	auxin responsiveness
Potri.001G136100.1	263	288	auxin responsiveness
Potri.001G136100.1	1817	1842	auxin responsiveness
Potri.001G136100.1	1870	1895	light responsive element
Potri.001G136100.1	289	314	abscisic acid responsiveness
Potri.002G060400.1	105	130	seed-specific regulation
Potri.002G060400.1	196	221	low-temperature responsiveness
Potri.002G060400.1	188	213	light responsive element
Potri.002G060400.1	215	240	light responsive element
Potri.002G060400.1	223	248	light responsive element
Potri.002G060400.1	432	457	light responsive element
Potri.002G060400.1	801	826	light responsive element
Potri.002G060400.1	989	1014	light responsive element
Potri.002G060400.1	1071	1096	light responsive element
Potri.002G060400.1	1101	1126	light responsive element
Potri.002G060400.1	1124	1149	light responsive element
Potri.002G060400.1	1786	1811	light responsive element
Potri.002G060400.1	1733	1758	gibberellin-responsive element
Potri.002G060400.1	1880	1905	gibberellin-responsive element
Potri.002G060400.1	1519	1544	light responsive element
Potri.002G060400.1	713	738	zein metabolism regulation
Potri.002G060400.1	882	907	light responsive element
Potri.002G060400.1	963	988	light responsive element
Potri.002G060400.1	1112	1137	light responsive element
Potri.002G060400.1	1949	1974	light responsive element
Potri.002G060400.1	1970	1995	light responsive element
Potri.002G060400.1	1613	1638	drought-inducibility
Potri.002G060400.1	628	653	meristem expression
Potri.002G060400.1	257	282	light responsive element
Potri.002G060400.1	1320	1345	anaerobic induction
Potri.002G060400.1	1462	1487	anaerobic induction
Potri.002G060400.1	1528	1553	anaerobic induction
Potri.002G060400.1	1673	1698	anaerobic induction
Potri.002G060400.1	1776	1801	light responsive element
Potri.002G060400.1	1967	1992	light responsive element
Potri.002G060500.1	410	435	circadian control
Potri.002G060500.1	1501	1526	abscisic acid responsiveness
Potri.002G060500.1	108	133	anaerobic induction
Potri.002G060500.1	191	216	anaerobic induction
Potri.002G060500.1	500	525	light responsive element
Potri.002G060500.1	793	818	light responsive element
Potri.002G060500.1	794	819	light responsive element
Potri.002G060500.1	316	341	drought-inducibility
Potri.002G060500.1	1483	1508	drought-inducibility
Potri.002G060500.1	237	262	meristem expression
Potri.002G060500.1	1520	1545	meristem expression
Potri.002G060500.1	1501	1526	light responsive element
Potri.002G060500.1	1159	1184	light responsive element
Potri.002G060500.1	941	966	light responsive element
Potri.002G060500.1	1648	1673	low-temperature responsiveness
Potri.002G153200.1	1007	1032	abscisic acid responsiveness
Potri.002G153200.1	1009	1034	abscisic acid responsiveness
Potri.002G153200.1	1066	1091	abscisic acid responsiveness
Potri.002G153200.1	1067	1092	abscisic acid responsiveness
Potri.002G153200.1	15	40	circadian control
Potri.002G153200.1	1009	1034	light responsive element
Potri.002G153200.1	1066	1091	light responsive element
Potri.002G153200.1	1008	1033	light responsive element
Potri.002G153200.1	1066	1091	light responsive element
Potri.002G153200.1	1956	1981	light responsive element
Potri.002G153200.1	766	791	light responsive element
Potri.002G153200.1	417	442	anaerobic induction
Potri.002G153200.1	723	748	anaerobic induction
Potri.002G153200.1	1202	1227	anaerobic induction
Potri.002G153200.1	307	332	light responsive element
Potri.002G153200.1	1684	1709	light responsive element
Potri.002G153200.1	1933	1958	light responsive element
Potri.002G153200.1	251	276	light responsive element
Potri.002G153200.1	210	235	gibberellin-responsive element
Potri.002G153200.1	234	259	light responsive element
Potri.002G153200.1	1162	1187	light responsive element
Potri.002G153200.1	1166	1191	light responsive element
Potri.002G153200.1	1941	1966	light responsive element
Potri.002G153200.1	264	289	light responsive element
Potri.002G153200.1	1117	1142	MeJA-responsiveness
Potri.002G153200.1	1117	1142	MeJA-responsiveness
Potri.002G153200.1	1838	1863	light responsive element
Potri.002G236200.1	1042	1067	light responsive element
Potri.002G236200.1	261	286	light responsive element
Potri.002G236200.1	499	524	light responsive element
Potri.002G236200.1	1136	1161	light responsive element
Potri.002G236200.1	1453	1478	light responsive element
Potri.002G236200.1	1574	1599	light responsive element
Potri.002G236200.1	46	71	light responsive element
Potri.002G236200.1	1418	1443	defense and stress responsiveness
Potri.002G236200.1	115	140	light responsive element
Potri.002G236200.1	701	726	cell cycle regulation
Potri.002G236200.1	925	950	light responsive element
Potri.002G236200.1	808	833	abscisic acid responsiveness
Potri.002G236200.1	1240	1265	abscisic acid responsiveness
Potri.002G236200.1	1958	1983	light responsive element
Potri.002G236200.1	867	892	drought-inducibility
Potri.002G236200.1	1390	1415	anaerobic induction
Potri.002G236200.1	1900	1925	light responsive element
Potri.002G236200.1	807	832	light responsive element
Potri.002G236200.1	1505	1530	light responsive element
Potri.002G236200.1	1239	1264	light responsive element
Potri.002G244200.1	321	346	light responsive element
Potri.002G244200.1	853	878	light responsive element
Potri.002G244200.1	1481	1506	light responsive element
Potri.002G244200.1	55	80	light responsive element
Potri.002G244200.1	1506	1531	light responsive element
Potri.002G244200.1	1127	1152	light responsive element
Potri.002G244200.1	1405	1430	light responsive element
Potri.002G244200.1	1709	1734	light responsive element
Potri.002G244200.1	1314	1339	light responsive element
Potri.002G244200.1	1175	1200	light responsive element
Potri.002G244200.1	664	689	drought-inducibility
Potri.002G244200.1	1909	1934	light responsive element
Potri.002G244200.1	676	701	light responsive element
Potri.002G244200.1	1911	1936	light responsive element
Potri.002G244200.1	1511	1536	light responsive element
Potri.002G244200.1	677	702	abscisic acid responsiveness
Potri.002G244200.1	1912	1937	abscisic acid responsiveness
Potri.002G244200.1	1169	1194	cell cycle regulation
Potri.003G097300.1	390	415	light responsive element
Potri.003G097300.1	1481	1506	light responsive element
Potri.003G097300.1	996	1021	MeJA-responsiveness
Potri.003G097300.1	1400	1425	light responsive element
Potri.003G097300.1	1973	1998	light responsive element
Potri.003G097300.1	996	1021	MeJA-responsiveness
Potri.003G097300.1	1737	1762	gibberellin-responsive element
Potri.003G097300.1	440	465	light responsive element
Potri.003G097300.1	689	714	light responsive element
Potri.003G097300.1	1868	1893	light responsive element
Potri.003G097300.1	1931	1956	light responsive element
Potri.003G097300.1	1216	1241	light responsive element
Potri.003G097300.1	1217	1242	light responsive element
Potri.003G097300.1	1216	1241	light responsive element
Potri.003G097300.1	1149	1174	meristem expression
Potri.003G097300.1	364	389	anaerobic induction
Potri.003G097300.1	941	966	anaerobic induction
Potri.003G097300.1	1675	1700	anaerobic induction
Potri.003G097300.1	1829	1854	light responsive element
Potri.003G097300.1	1976	2001	light responsive element
Potri.003G159700.1	1319	1344	light responsive element
Potri.003G159700.1	1467	1492	light responsive element
Potri.003G159700.1	241	266	drought-inducibility
Potri.003G159700.1	1237	1262	meristem expression
Potri.003G159700.1	597	622	anaerobic induction
Potri.003G159700.1	1727	1752	anaerobic induction
Potri.003G159700.1	248	273	light responsive element
Potri.003G159700.1	250	275	light responsive element
Potri.003G159700.1	1270	1295	light responsive element
Potri.003G159700.1	1353	1378	light responsive element
Potri.003G159700.1	1354	1379	light responsive element
Potri.003G159700.1	466	491	abscisic acid responsiveness
Potri.003G159700.1	1319	1344	abscisic acid responsiveness
Potri.003G159700.1	1320	1345	abscisic acid responsiveness
Potri.003G159700.1	1468	1493	abscisic acid responsiveness
Potri.003G159700.1	1072	1097	circadian control
Potri.003G159700.1	1939	1964	MeJA-responsiveness
Potri.003G159700.1	913	938	low-temperature responsiveness
Potri.003G159700.1	473	498	light responsive element
Potri.003G159700.1	767	792	light responsive element
Potri.003G159700.1	1577	1602	light responsive element
Potri.003G159700.1	1612	1637	light responsive element
Potri.003G159700.1	1633	1658	light responsive element
Potri.003G159700.1	1670	1695	light responsive element
Potri.003G159700.1	1939	1964	MeJA-responsiveness
Potri.003G159700.1	1741	1766	light responsive element
Potri.003G159700.1	626	651	light responsive element
Potri.003G159700.1	459	484	zein metabolism regulation
Potri.004G021000.1	1833	1858	anaerobic induction
Potri.004G021000.1	237	262	light responsive element
Potri.004G021000.1	397	422	light responsive element
Potri.004G021000.1	399	424	light responsive element
Potri.004G021000.1	1539	1564	light responsive element
Potri.004G021000.1	1243	1268	meristem expression
Potri.004G021000.1	1060	1085	drought-inducibility
Potri.004G021000.1	910	935	light responsive element
Potri.004G021000.1	1664	1689	light responsive element
Potri.004G021000.1	1665	1690	light responsive element
Potri.004G021000.1	1665	1690	abscisic acid responsiveness
Potri.004G021000.1	110	135	light responsive element
Potri.004G021000.1	1689	1714	light responsive element
Potri.004G021000.1	1541	1566	light responsive element
Potri.004G021000.1	1692	1717	light responsive element
Potri.004G021000.1	1122	1147	auxin responsiveness
Potri.004G021000.1	1023	1048	gibberellin-responsive element
Potri.004G021000.1	53	78	light responsive element
Potri.004G021000.1	253	278	light responsive element
Potri.004G021000.1	926	951	light responsive element
Potri.004G021000.1	1528	1553	light responsive element
Potri.004G021000.1	1658	1683	light responsive element
Potri.004G021000.1	1716	1741	light responsive element
Potri.005G007200.1	429	454	light responsive element
Potri.005G007200.1	1757	1782	drought-inducibility
Potri.005G007200.1	1169	1194	light responsive element
Potri.005G007200.1	1123	1148	light responsive element
Potri.005G007200.1	1569	1594	light responsive element
Potri.005G007200.1	862	887	anaerobic induction
Potri.005G007200.1	960	985	anaerobic induction
Potri.005G007200.1	1260	1285	anaerobic induction
Potri.005G007200.1	1634	1659	anaerobic induction
Potri.005G007200.1	1644	1669	anaerobic induction
Potri.005G007200.1	197	222	light responsive element
Potri.005G007200.1	1661	1686	light responsive element
Potri.005G007200.1	21	46	light responsive element
Potri.005G007200.1	226	251	light responsive element
Potri.005G007200.1	522	547	light responsive element
Potri.005G007200.1	526	551	light responsive element
Potri.005G007200.1	930	955	light responsive element
Potri.005G007200.1	1653	1678	light responsive element
Potri.005G007200.1	1569	1594	defense and stress responsiveness
Potri.005G007200.1	906	931	light responsive element
Potri.005G201200.1	1021	1046	light responsive element
Potri.005G201200.1	327	352	light responsive element
Potri.005G201200.1	1542	1567	light responsive element
Potri.005G201200.1	801	826	light responsive element
Potri.005G201200.1	827	852	light responsive element
Potri.005G201200.1	1335	1360	light responsive element
Potri.005G201200.1	1574	1599	anaerobic induction
Potri.005G201200.1	1561	1586	meristem expression
Potri.005G201200.1	9	34	drought-inducibility
Potri.005G201200.1	1607	1632	drought-inducibility
Potri.005G201200.1	328	353	abscisic acid responsiveness
Potri.005G201200.1	1021	1046	abscisic acid responsiveness
Potri.005G201200.1	1542	1567	abscisic acid responsiveness
Potri.005G201200.1	232	257	light responsive element
Potri.005G201200.1	511	536	light responsive element
Potri.005G201200.1	71	96	MeJA-responsiveness
Potri.005G201200.1	615	640	gibberellin-responsive element
Potri.005G201200.1	431	456	light responsive element
Potri.005G201200.1	1970	1995	light responsive element
Potri.005G201200.1	407	432	light responsive element
Potri.005G201200.1	1517	1542	light responsive element
Potri.005G201200.1	71	96	MeJA-responsiveness
Potri.006G071200.1	685	710	abscisic acid responsiveness
Potri.006G071200.1	1004	1029	abscisic acid responsiveness
Potri.006G071200.1	908	933	light responsive element
Potri.006G071200.1	208	233	light responsive element
Potri.006G071200.1	210	235	light responsive element
Potri.006G071200.1	998	1023	light responsive element
Potri.006G071200.1	999	1024	light responsive element
Potri.006G071200.1	1274	1299	light responsive element
Potri.006G071200.1	441	466	light responsive element
Potri.006G071200.1	1073	1098	light responsive element
Potri.006G071200.1	1258	1283	drought-inducibility
Potri.006G071200.1	685	710	light responsive element
Potri.006G071200.1	1004	1029	light responsive element
Potri.006G071200.1	684	709	zein metabolism regulation
Potri.006G071200.1	198	223	MeJA-responsiveness
Potri.006G071200.1	687	712	MeJA-responsiveness
Potri.006G071200.1	1749	1774	MeJA-responsiveness
Potri.006G071200.1	666	691	light responsive element
Potri.006G071200.1	951	976	light responsive element
Potri.006G071200.1	154	179	light responsive element
Potri.006G071200.1	493	518	light responsive element
Potri.006G071200.1	933	958	light responsive element
Potri.006G071200.1	986	1011	light responsive element
Potri.006G071200.1	1449	1474	light responsive element
Potri.006G071200.1	1735	1760	light responsive element
Potri.006G071200.1	1388	1413	light responsive element
Potri.006G071200.1	198	223	MeJA-responsiveness
Potri.006G071200.1	687	712	MeJA-responsiveness
Potri.006G071200.1	1749	1774	MeJA-responsiveness
Potri.006G071200.1	1795	1820	low-temperature responsiveness
Potri.006G122900.1	155	180	light responsive element
Potri.006G122900.1	1323	1348	light responsive element
Potri.006G122900.1	892	917	light responsive element
Potri.006G122900.1	1634	1659	light responsive element
Potri.006G122900.1	1642	1667	anaerobic induction
Potri.006G122900.1	1757	1782	anaerobic induction
Potri.006G122900.1	28	53	light responsive element
Potri.006G122900.1	130	155	light responsive element
Potri.006G122900.1	131	156	light responsive element
Potri.006G122900.1	149	174	light responsive element
Potri.006G122900.1	672	697	light responsive element
Potri.006G122900.1	665	690	drought-inducibility
Potri.006G122900.1	1712	1737	drought-inducibility
Potri.006G122900.1	1880	1905	drought-inducibility
Potri.006G122900.1	155	180	abscisic acid responsiveness
Potri.006G122900.1	1438	1463	defense and stress responsiveness
Potri.006G122900.1	5	30	light responsive element
Potri.006G122900.1	1427	1452	light responsive element
Potri.006G122900.1	1555	1580	MeJA-responsiveness
Potri.006G122900.1	1092	1117	light responsive element
Potri.006G122900.1	47	72	light responsive element
Potri.006G122900.1	1555	1580	MeJA-responsiveness
Potri.006G160700.1	651	676	auxin responsiveness
Potri.006G160700.1	636	661	light responsive element
Potri.006G160700.1	841	866	meristem expression
Potri.006G160700.1	1382	1407	drought-inducibility
Potri.006G160700.1	456	481	light responsive element
Potri.006G160700.1	681	706	light responsive element
Potri.006G160700.1	1412	1437	light responsive element
Potri.006G160700.1	404	429	light responsive element
Potri.006G160700.1	405	430	light responsive element
Potri.006G160700.1	-7	18	light responsive element
Potri.006G160700.1	170	195	MeJA-responsiveness
Potri.006G160700.1	565	590	MeJA-responsiveness
Potri.006G160700.1	1464	1489	MeJA-responsiveness
Potri.006G160700.1	43	68	light responsive element
Potri.006G160700.1	170	195	MeJA-responsiveness
Potri.006G160700.1	565	590	MeJA-responsiveness
Potri.006G160700.1	1464	1489	MeJA-responsiveness
Potri.006G160700.1	213	238	gibberellin-responsive element
Potri.006G160700.1	1236	1261	gibberellin-responsive element
Potri.006G160700.1	452	477	defense and stress responsiveness
Potri.006G160700.1	1412	1437	defense and stress responsiveness
Potri.006G169900.1	1600	1625	light responsive element
Potri.006G169900.1	91	116	gibberellin-responsive element
Potri.006G169900.1	1695	1720	low-temperature responsiveness
Potri.006G169900.1	238	263	MeJA-responsiveness
Potri.006G169900.1	267	292	MeJA-responsiveness
Potri.006G169900.1	1117	1142	defense and stress responsiveness
Potri.006G170000.1	210	235	MeJA-responsiveness
Potri.006G170000.1	239	264	MeJA-responsiveness
Potri.006G170000.1	568	593	MeJA-responsiveness
Potri.006G170000.1	140	165	zein metabolism regulation
Potri.006G170000.1	1901	1926	zein metabolism regulation
Potri.006G170000.1	1600	1625	light responsive element
Potri.006G170000.1	63	88	gibberellin-responsive element
Potri.006G170000.1	1695	1720	low-temperature responsiveness
Potri.006G170000.1	210	235	MeJA-responsiveness
Potri.006G170000.1	239	264	MeJA-responsiveness
Potri.006G170000.1	568	593	MeJA-responsiveness
Potri.006G170000.1	1105	1130	defense and stress responsiveness
Potri.006G170100.1	1740	1765	abscisic acid responsiveness
Potri.006G170100.1	0	25	light responsive element
Potri.006G170100.1	21	46	light responsive element
Potri.006G170100.1	34	59	light responsive element
Potri.006G170100.1	1631	1656	auxin responsiveness
Potri.006G170100.1	1739	1764	light responsive element
Potri.006G170100.1	1428	1453	light responsive element
Potri.006G170100.1	1259	1284	anaerobic induction
Potri.006G170100.1	1728	1753	light responsive element
Potri.006G170100.1	1566	1591	drought-inducibility
Potri.006G170100.1	288	313	light responsive element
Potri.006G170100.1	993	1018	zein metabolism regulation
Potri.006G170100.1	1901	1926	zein metabolism regulation
Potri.006G170100.1	1600	1625	light responsive element
Potri.006G170100.1	1695	1720	low-temperature responsiveness
Potri.007G008500.1	1630	1655	low-temperature responsiveness
Potri.007G008500.1	1805	1830	MeJA-responsiveness
Potri.007G008500.1	1855	1880	light responsive element
Potri.007G008500.1	1089	1114	light responsive element
Potri.007G008500.1	1805	1830	MeJA-responsiveness
Potri.007G008500.1	1083	1108	light responsive element
Potri.007G008500.1	1184	1209	light responsive element
Potri.007G008500.1	37	62	light responsive element
Potri.007G008500.1	713	738	light responsive element
Potri.007G008500.1	1925	1950	light responsive element
Potri.007G008500.1	1885	1910	light responsive element
Potri.007G008500.1	1203	1228	light responsive element
Potri.007G008500.1	1785	1810	drought-inducibility
Potri.007G008500.1	1890	1915	drought-inducibility
Potri.007G008500.1	1378	1403	circadian control
Potri.007G008500.1	138	163	auxin responsiveness
Potri.008G138400.1	1777	1802	light responsive element
Potri.008G138400.1	1137	1162	drought-inducibility
Potri.008G138400.1	604	629	light responsive element
Potri.008G138400.1	678	703	light responsive element
Potri.008G138400.1	104	129	anaerobic induction
Potri.008G138400.1	1051	1076	anaerobic induction
Potri.008G138400.1	121	146	light responsive element
Potri.008G138400.1	1329	1354	light responsive element
Potri.008G138400.1	78	103	light responsive element
Potri.008G138400.1	258	283	light responsive element
Potri.008G138400.1	1123	1148	light responsive element
Potri.008G138400.1	1216	1241	light responsive element
Potri.008G138400.1	891	916	light responsive element
Potri.008G138400.1	979	1004	light responsive element
Potri.008G138400.1	1775	1800	light responsive element
Potri.008G138400.1	1296	1321	gibberellin-responsive element
Potri.008G138400.1	614	639	MeJA-responsiveness
Potri.008G138400.1	251	276	light responsive element
Potri.008G138400.1	448	473	light responsive element
Potri.008G138400.1	917	942	light responsive element
Potri.008G138400.1	15	40	low-temperature responsiveness
Potri.008G138400.1	1444	1469	low-temperature responsiveness
Potri.008G138400.1	614	639	MeJA-responsiveness
Potri.008G138400.1	1329	1354	defense and stress responsiveness
Potri.009G006600.1	791	816	auxin responsiveness
Potri.009G006600.1	454	479	abscisic acid responsiveness
Potri.009G006600.1	1677	1702	light responsive element
Potri.009G006600.1	57	82	light responsive element
Potri.009G006600.1	822	847	anaerobic induction
Potri.009G006600.1	418	443	drought-inducibility
Potri.009G006600.1	697	722	drought-inducibility
Potri.009G006600.1	1864	1889	drought-inducibility
Potri.009G006600.1	453	478	light responsive element
Potri.009G006600.1	1770	1795	zein metabolism regulation
Potri.009G006600.1	1073	1098	auxin responsiveness
Potri.009G006600.1	1801	1826	MeJA-responsiveness
Potri.009G006600.1	472	497	light responsive element
Potri.009G006600.1	1523	1548	light responsive element
Potri.009G006600.1	1303	1328	gibberellin-responsive element
Potri.009G006600.1	-5	20	light responsive element
Potri.009G006600.1	1137	1162	light responsive element
Potri.009G006600.1	12	37	light responsive element
Potri.009G006600.1	1801	1826	MeJA-responsiveness
Potri.009G006600.1	1640	1665	seed-specific regulation
Potri.009G006600.1	950	975	light responsive element
Potri.009G006600.1	1630	1655	light responsive element
Potri.009G083800.1	665	690	light responsive element
Potri.009G083800.1	1336	1361	light responsive element
Potri.009G083800.1	640	665	anaerobic induction
Potri.009G083800.1	1228	1253	anaerobic induction
Potri.009G083800.1	1670	1695	light responsive element
Potri.009G083800.1	930	955	light responsive element
Potri.009G083800.1	449	474	light responsive element
Potri.009G083800.1	301	326	light responsive element
Potri.009G083800.1	194	219	gibberellin-responsive element
Potri.009G083800.1	1578	1603	auxin responsiveness
Potri.009G083800.1	1001	1026	low-temperature responsiveness
Potri.009G083800.1	1283	1308	low-temperature responsiveness
Potri.009G083800.1	1014	1039	MeJA-responsiveness
Potri.009G083800.1	780	805	seed-specific regulation
Potri.009G083800.1	1014	1039	MeJA-responsiveness
Potri.009G083800.1	775	800	zein metabolism regulation
Potri.009G083800.1	412	437	light responsive element
Potri.010G102300.1	1830	1855	light responsive element
Potri.010G102300.1	1561	1586	MeJA-responsiveness
Potri.010G102300.1	1561	1586	MeJA-responsiveness
Potri.010G102300.1	850	875	light responsive element
Potri.010G102300.1	1596	1621	light responsive element
Potri.010G102300.1	174	199	light responsive element
Potri.010G102300.1	245	270	light responsive element
Potri.010G102300.1	1086	1111	light responsive element
Potri.010G102300.1	754	779	anaerobic induction
Potri.010G102300.1	786	811	anaerobic induction
Potri.010G102300.1	1096	1121	anaerobic induction
Potri.010G102300.1	1291	1316	anaerobic induction
Potri.010G102300.1	1836	1861	light responsive element
Potri.010G102300.1	447	472	light responsive element
Potri.010G102300.1	457	482	light responsive element
Potri.010G102300.1	1878	1903	light responsive element
Potri.010G102300.1	127	152	light responsive element
Potri.010G102300.1	1691	1716	light responsive element
Potri.010G102300.1	1749	1774	light responsive element
Potri.011G025800.1	408	433	anaerobic induction
Potri.011G025800.1	585	610	anaerobic induction
Potri.011G025800.1	780	805	anaerobic induction
Potri.011G025800.1	845	870	anaerobic induction
Potri.011G025800.1	1396	1421	anaerobic induction
Potri.011G025800.1	1491	1516	anaerobic induction
Potri.011G025800.1	736	761	light responsive element
Potri.011G025800.1	1076	1101	light responsive element
Potri.011G025800.1	1077	1102	light responsive element
Potri.011G025800.1	1477	1502	light responsive element
Potri.011G025800.1	861	886	light responsive element
Potri.011G025800.1	1033	1058	light responsive element
Potri.011G025800.1	1697	1722	light responsive element
Potri.011G025800.1	1235	1260	cell cycle regulation
Potri.011G025800.1	1025	1050	light responsive element
Potri.011G025800.1	399	424	light responsive element
Potri.011G025800.1	695	720	light responsive element
Potri.011G025800.1	702	727	light responsive element
Potri.011G025800.1	706	731	light responsive element
Potri.011G025800.1	710	735	light responsive element
Potri.011G025800.1	714	739	light responsive element
Potri.011G025800.1	533	558	light responsive element
Potri.011G077300.1	450	475	abscisic acid responsiveness
Potri.011G077300.1	501	526	abscisic acid responsiveness
Potri.011G077300.1	1371	1396	abscisic acid responsiveness
Potri.011G077300.1	1372	1397	abscisic acid responsiveness
Potri.011G077300.1	1827	1852	abscisic acid responsiveness
Potri.011G077300.1	1971	1996	abscisic acid responsiveness
Potri.011G077300.1	1013	1038	light responsive element
Potri.011G077300.1	1371	1396	light responsive element
Potri.011G077300.1	1826	1851	light responsive element
Potri.011G077300.1	1971	1996	light responsive element
Potri.011G077300.1	449	474	light responsive element
Potri.011G077300.1	500	525	light responsive element
Potri.011G077300.1	1371	1396	light responsive element
Potri.011G077300.1	1496	1521	light responsive element
Potri.011G077300.1	738	763	meristem expression
Potri.011G077300.1	1703	1728	light responsive element
Potri.011G077300.1	1940	1965	light responsive element
Potri.011G077300.1	746	771	light responsive element
Potri.011G077300.1	1782	1807	light responsive element
Potri.011G077300.1	365	390	anaerobic induction
Potri.011G077300.1	800	825	anaerobic induction
Potri.011G077300.1	1361	1386	anaerobic induction
Potri.011G077300.1	1416	1441	light responsive element
Potri.011G077300.1	58	83	light responsive element
Potri.011G077300.1	1005	1030	light responsive element
Potri.011G077300.1	1960	1985	light responsive element
Potri.011G077300.1	673	698	MeJA-responsiveness
Potri.011G077300.1	688	713	MeJA-responsiveness
Potri.011G077300.1	732	757	MeJA-responsiveness
Potri.011G077300.1	507	532	zein metabolism regulation
Potri.011G077300.1	343	368	light responsive element
Potri.011G077300.1	673	698	MeJA-responsiveness
Potri.011G077300.1	688	713	MeJA-responsiveness
Potri.011G077300.1	732	757	MeJA-responsiveness
Potri.011G077400.1	660	685	light responsive element
Potri.011G077400.1	1918	1943	light responsive element
Potri.011G077400.1	1498	1523	anaerobic induction
Potri.011G077400.1	1848	1873	anaerobic induction
Potri.011G077400.1	456	481	light responsive element
Potri.011G077400.1	581	606	light responsive element
Potri.011G077400.1	62	87	light responsive element
Potri.011G077400.1	1277	1302	light responsive element
Potri.011G077400.1	1328	1353	light responsive element
Potri.011G077400.1	1329	1354	light responsive element
Potri.011G077400.1	1327	1352	light responsive element
Potri.011G077400.1	1329	1354	light responsive element
Potri.011G077400.1	1927	1952	auxin responsiveness
Potri.011G077400.1	1161	1186	cell cycle regulation
Potri.011G077400.1	63	88	abscisic acid responsiveness
Potri.011G077400.1	1278	1303	abscisic acid responsiveness
Potri.011G077400.1	1327	1352	abscisic acid responsiveness
Potri.011G077400.1	1329	1354	abscisic acid responsiveness
Potri.011G077400.1	1330	1355	abscisic acid responsiveness
Potri.011G077400.1	1121	1146	light responsive element
Potri.011G077400.1	1262	1287	light responsive element
Potri.011G077400.1	988	1013	MeJA-responsiveness
Potri.011G077400.1	1276	1301	MeJA-responsiveness
Potri.011G077400.1	1186	1211	light responsive element
Potri.011G077400.1	988	1013	MeJA-responsiveness
Potri.011G077400.1	1276	1301	MeJA-responsiveness
Potri.011G077400.1	1403	1428	light responsive element
Potri.011G077400.1	1743	1768	light responsive element
Potri.011G077400.1	1890	1915	light responsive element
Potri.011G077400.1	874	899	light responsive element
Potri.013G005700.1	1592	1617	light responsive element
Potri.013G005700.1	1932	1957	light responsive element
Potri.013G005700.1	790	815	light responsive element
Potri.013G005700.1	1486	1511	light responsive element
Potri.013G005700.1	190	215	light responsive element
Potri.013G005700.1	593	618	drought-inducibility
Potri.013G005700.1	1891	1916	drought-inducibility
Potri.013G005700.1	1367	1392	light responsive element
Potri.013G005700.1	1574	1599	light responsive element
Potri.013G005700.1	993	1018	anaerobic induction
Potri.013G005700.1	790	815	abscisic acid responsiveness
Potri.013G005700.1	928	953	abscisic acid responsiveness
Potri.013G005700.1	1487	1512	abscisic acid responsiveness
Potri.013G005700.1	557	582	gibberellin-responsive element
Potri.013G005700.1	1694	1719	gibberellin-responsive element
Potri.013G005700.1	1515	1540	auxin responsiveness
Potri.013G005700.1	1180	1205	low-temperature responsiveness
Potri.013G005700.1	1556	1581	MeJA-responsiveness
Potri.013G005700.1	1574	1599	defense and stress responsiveness
Potri.013G005700.1	1639	1664	defense and stress responsiveness
Potri.013G005700.1	420	445	light responsive element
Potri.013G005700.1	1676	1701	light responsive element
Potri.013G005700.1	1786	1811	light responsive element
Potri.013G005700.1	404	429	light responsive element
Potri.013G005700.1	1303	1328	light responsive element
Potri.013G005700.1	1556	1581	MeJA-responsiveness
Potri.013G005700.1	1117	1142	zein metabolism regulation
Potri.013G005700.1	739	764	auxin responsiveness
Potri.013G152400.1	1283	1308	zein metabolism regulation
Potri.013G152400.1	931	956	MeJA-responsiveness
Potri.013G152400.1	1776	1801	MeJA-responsiveness
Potri.013G152400.1	1705	1730	light responsive element
Potri.013G152400.1	557	582	light responsive element
Potri.013G152400.1	716	741	light responsive element
Potri.013G152400.1	780	805	light responsive element
Potri.013G152400.1	1405	1430	light responsive element
Potri.013G152400.1	773	798	light responsive element
Potri.013G152400.1	1399	1424	light responsive element
Potri.013G152400.1	931	956	MeJA-responsiveness
Potri.013G152400.1	1776	1801	MeJA-responsiveness
Potri.013G152400.1	933	958	abscisic acid responsiveness
Potri.013G152400.1	1106	1131	abscisic acid responsiveness
Potri.013G152400.1	1108	1133	abscisic acid responsiveness
Potri.013G152400.1	1109	1134	abscisic acid responsiveness
Potri.013G152400.1	1275	1300	abscisic acid responsiveness
Potri.013G152400.1	1778	1803	abscisic acid responsiveness
Potri.013G152400.1	794	819	anaerobic induction
Potri.013G152400.1	1799	1824	meristem expression
Potri.013G152400.1	1073	1098	drought-inducibility
Potri.013G152400.1	1139	1164	drought-inducibility
Potri.013G152400.1	1108	1133	light responsive element
Potri.013G152400.1	932	957	light responsive element
Potri.013G152400.1	1105	1130	light responsive element
Potri.013G152400.1	1108	1133	light responsive element
Potri.013G152400.1	1272	1297	light responsive element
Potri.013G152400.1	1274	1299	light responsive element
Potri.013G152400.1	1777	1802	light responsive element
Potri.013G152400.1	772	797	light responsive element
Potri.014G115000.1	1964	1989	MeJA-responsiveness
Potri.014G115000.1	1979	2004	MeJA-responsiveness
Potri.014G115000.1	534	559	light responsive element
Potri.014G115000.1	547	572	defense and stress responsiveness
Potri.014G115000.1	1060	1085	defense and stress responsiveness
Potri.014G115000.1	1721	1746	defense and stress responsiveness
Potri.014G115000.1	397	422	light responsive element
Potri.014G115000.1	589	614	light responsive element
Potri.014G115000.1	635	660	light responsive element
Potri.014G115000.1	1352	1377	light responsive element
Potri.014G115000.1	121	146	light responsive element
Potri.014G115000.1	1964	1989	MeJA-responsiveness
Potri.014G115000.1	1979	2004	MeJA-responsiveness
Potri.014G115000.1	1976	2001	zein metabolism regulation
Potri.014G115000.1	1344	1369	light responsive element
Potri.014G115000.1	1410	1435	light responsive element
Potri.014G115000.1	1977	2002	light responsive element
Potri.014G115000.1	1263	1288	light responsive element
Potri.014G115000.1	1410	1435	light responsive element
Potri.014G115000.1	483	508	drought-inducibility
Potri.014G115000.1	143	168	light responsive element
Potri.014G115000.1	547	572	light responsive element
Potri.014G115000.1	1249	1274	light responsive element
Potri.014G115000.1	1721	1746	light responsive element
Potri.014G115000.1	811	836	anaerobic induction
Potri.014G115000.1	1242	1267	anaerobic induction
Potri.014G115000.1	1810	1835	anaerobic induction
Potri.014G115000.1	1303	1328	light responsive element
Potri.014G115000.1	1264	1289	abscisic acid responsiveness
Potri.014G115000.1	1410	1435	abscisic acid responsiveness
Potri.014G115000.1	1411	1436	abscisic acid responsiveness
Potri.014G115000.1	1977	2002	abscisic acid responsiveness
Potri.014G115000.1	350	375	auxin responsiveness
Potri.014G115000.1	385	410	circadian control
Potri.014G115000.1	1144	1169	circadian control
Potri.014G140300.1	786	811	drought-inducibility
Potri.014G140300.1	959	984	light responsive element
Potri.014G140300.1	1900	1925	anoxic specific inducibility
Potri.014G140300.1	168	193	light responsive element
Potri.014G140300.1	664	689	light responsive element
Potri.014G140300.1	1558	1583	light responsive element
Potri.014G140300.1	1707	1732	light responsive element
Potri.014G140300.1	168	193	light responsive element
Potri.014G140300.1	482	507	light responsive element
Potri.014G140300.1	484	509	light responsive element
Potri.014G140300.1	600	625	light responsive element
Potri.014G140300.1	664	689	light responsive element
Potri.014G140300.1	455	480	auxin responsiveness
Potri.014G140300.1	168	193	abscisic acid responsiveness
Potri.014G140300.1	169	194	abscisic acid responsiveness
Potri.014G140300.1	485	510	abscisic acid responsiveness
Potri.014G140300.1	601	626	abscisic acid responsiveness
Potri.014G140300.1	664	689	abscisic acid responsiveness
Potri.014G140300.1	665	690	abscisic acid responsiveness
Potri.014G140300.1	1559	1584	abscisic acid responsiveness
Potri.014G140300.1	1707	1732	abscisic acid responsiveness
Potri.014G140300.1	1947	1972	gibberellin-responsive element
Potri.014G140300.1	1772	1797	MeJA-responsiveness
Potri.014G140300.1	294	319	light responsive element
Potri.014G140300.1	407	432	light responsive element
Potri.014G140300.1	1772	1797	MeJA-responsiveness
Potri.014G140300.1	127	152	zein metabolism regulation
Potri.014G140300.1	838	863	zein metabolism regulation
Potri.014G140300.1	617	642	auxin responsiveness
Potri.014G140300.1	193	218	light responsive element
Potri.014G140300.1	915	940	light responsive element
Potri.014G146100.1	1359	1384	anoxic specific inducibility
Potri.014G146100.1	353	378	light responsive element
Potri.014G146100.1	1225	1250	light responsive element
Potri.014G146100.1	1226	1251	light responsive element
Potri.014G146100.1	718	743	light responsive element
Potri.014G146100.1	412	437	light responsive element
Potri.014G146100.1	442	467	light responsive element
Potri.014G146100.1	486	511	anaerobic induction
Potri.014G146100.1	1388	1413	anaerobic induction
Potri.014G146100.1	1504	1529	anaerobic induction
Potri.014G146100.1	1192	1217	light responsive element
Potri.014G146100.1	1252	1277	light responsive element
Potri.014G146100.1	380	405	meristem expression
Potri.014G146100.1	353	378	abscisic acid responsiveness
Potri.014G146100.1	1227	1252	abscisic acid responsiveness
Potri.014G146100.1	880	905	seed-specific regulation
Potri.014G146100.1	310	335	MeJA-responsiveness
Potri.014G146100.1	315	340	MeJA-responsiveness
Potri.014G146100.1	1265	1290	low-temperature responsiveness
Potri.014G146100.1	154	179	light responsive element
Potri.014G146100.1	207	232	light responsive element
Potri.014G146100.1	950	975	light responsive element
Potri.014G146100.1	1413	1438	light responsive element
Potri.014G146100.1	1447	1472	light responsive element
Potri.014G146100.1	1611	1636	light responsive element
Potri.014G146100.1	1645	1670	light responsive element
Potri.014G146100.1	1363	1388	auxin responsiveness
Potri.014G146100.1	902	927	light responsive element
Potri.014G146100.1	1128	1153	light responsive element
Potri.014G146100.1	310	335	MeJA-responsiveness
Potri.014G146100.1	315	340	MeJA-responsiveness
Potri.014G152700.1	1827	1852	light responsive element
Potri.014G152700.1	528	553	anaerobic induction
Potri.014G152700.1	1717	1742	anaerobic induction
Potri.014G152700.1	1743	1768	anaerobic induction
Potri.014G152700.1	1027	1052	light responsive element
Potri.014G152700.1	1392	1417	light responsive element
Potri.014G152700.1	1032	1057	light responsive element
Potri.014G152700.1	1145	1170	light responsive element
Potri.014G152700.1	1032	1057	abscisic acid responsiveness
Potri.014G152700.1	84	109	light responsive element
Potri.014G152700.1	427	452	light responsive element
Potri.014G152700.1	632	657	light responsive element
Potri.014G152700.1	927	952	light responsive element
Potri.014G152700.1	999	1024	light responsive element
Potri.014G152700.1	1003	1028	light responsive element
Potri.014G152700.1	1453	1478	light responsive element
Potri.016G098600.1	1178	1203	zein metabolism regulation
Potri.016G098600.1	78	103	MeJA-responsiveness
Potri.016G098600.1	1737	1762	light responsive element
Potri.016G098600.1	1278	1303	light responsive element
Potri.016G098600.1	1773	1798	defense and stress responsiveness
Potri.016G098600.1	1349	1374	light responsive element
Potri.016G098600.1	668	693	low-temperature responsiveness
Potri.016G098600.1	78	103	MeJA-responsiveness
Potri.016G098600.1	1454	1479	light responsive element
Potri.016G098600.1	1563	1588	light responsive element
Potri.016G098600.1	1595	1620	light responsive element
Potri.016G098600.1	1500	1525	abscisic acid responsiveness
Potri.016G098600.1	1886	1911	abscisic acid responsiveness
Potri.016G098600.1	1630	1655	light responsive element
Potri.016G098600.1	1846	1871	light responsive element
Potri.016G098600.1	268	293	drought-inducibility
Potri.016G098600.1	1852	1877	drought-inducibility
Potri.016G098600.1	1472	1497	light responsive element
Potri.016G098600.1	1499	1524	light responsive element
Potri.016G098600.1	1885	1910	light responsive element
Potri.016G098600.1	1886	1911	light responsive element
Potri.018G084300.1	1860	1885	light responsive element
Potri.018G084300.1	1967	1992	light responsive element
Potri.018G084300.1	1194	1219	MeJA-responsiveness
Potri.018G084300.1	1821	1846	MeJA-responsiveness
Potri.018G084300.1	836	861	light responsive element
Potri.018G084300.1	1402	1427	light responsive element
Potri.018G084300.1	339	364	light responsive element
Potri.018G084300.1	1194	1219	MeJA-responsiveness
Potri.018G084300.1	1821	1846	MeJA-responsiveness
Potri.018G084300.1	1079	1104	light responsive element
Potri.018G084300.1	43	68	anaerobic induction
Potri.018G084300.1	1014	1039	anaerobic induction
Potri.018G084300.1	1778	1803	light responsive element
Potri.018G084300.1	1779	1804	light responsive element
Potri.018G084300.1	31	56	light responsive element
Potri.018G084300.1	1080	1105	abscisic acid responsiveness
Potri.018G094800.1	1297	1322	light responsive element
Potri.018G094800.1	22	47	light responsive element
Potri.018G094800.1	1292	1317	light responsive element
Potri.018G094800.1	330	355	anaerobic induction
Potri.018G094800.1	602	627	meristem expression
Potri.018G094800.1	23	48	abscisic acid responsiveness
Potri.018G094800.1	1530	1555	auxin responsiveness
Potri.018G094800.1	410	435	gibberellin-responsive element
Potri.018G094800.1	1676	1701	light responsive element
Potri.018G094800.1	1467	1492	defense and stress responsiveness
Potri.018G094800.1	1752	1777	defense and stress responsiveness
Potri.018G094800.1	99	124	MeJA-responsiveness
Potri.018G094800.1	851	876	MeJA-responsiveness
Potri.018G094800.1	1688	1713	MeJA-responsiveness
Potri.018G094800.1	342	367	light responsive element
Potri.018G094800.1	392	417	light responsive element
Potri.018G094800.1	564	589	light responsive element
Potri.018G094800.1	904	929	light responsive element
Potri.018G094800.1	99	124	MeJA-responsiveness
Potri.018G094800.1	851	876	MeJA-responsiveness
Potri.018G094800.1	1688	1713	MeJA-responsiveness
Potri.018G094900.1	202	227	light responsive element
Potri.018G094900.1	375	400	light responsive element
Potri.018G094900.1	562	587	light responsive element
Potri.018G094900.1	650	675	light responsive element
Potri.018G094900.1	731	756	light responsive element
Potri.018G094900.1	1555	1580	light responsive element
Potri.018G094900.1	1140	1165	light responsive element
Potri.018G094900.1	13	38	anoxic specific inducibility
Potri.018G094900.1	1503	1528	anoxic specific inducibility
Potri.018G094900.1	1830	1855	drought-inducibility
Potri.018G094900.1	1241	1266	anaerobic induction
Potri.018G094900.1	1400	1425	anaerobic induction
Potri.018G094900.1	1524	1549	anaerobic induction
Potri.018G094900.1	1965	1990	anaerobic induction
Potri.018G094900.1	1146	1171	light responsive element
Potri.018G094900.1	365	390	light responsive element
Potri.018G094900.1	609	634	light responsive element
Potri.018G094900.1	261	286	abscisic acid responsiveness
Potri.018G094900.1	1141	1166	abscisic acid responsiveness
Potri.018G095100.1	703	728	MeJA-responsiveness
Potri.018G095100.1	461	486	light responsive element
Potri.018G095100.1	756	781	light responsive element
Potri.018G095100.1	1060	1085	light responsive element
Potri.018G095100.1	1922	1947	light responsive element
Potri.018G095100.1	101	126	light responsive element
Potri.018G095100.1	401	426	light responsive element
Potri.018G095100.1	521	546	gibberellin-responsive element
Potri.018G095100.1	703	728	MeJA-responsiveness
Potri.018G095100.1	1479	1504	light responsive element
Potri.018G095100.1	1469	1494	light responsive element
Potri.018G095100.1	454	479	abscisic acid responsiveness
Potri.018G095100.1	846	871	abscisic acid responsiveness
Potri.018G095100.1	1039	1064	drought-inducibility
Potri.018G095100.1	1798	1823	light responsive element
Potri.018G095100.1	103	128	light responsive element
Potri.018G095100.1	846	871	light responsive element
Potri.018G095200.1	621	646	MeJA-responsiveness
Potri.018G095200.1	1670	1695	MeJA-responsiveness
Potri.018G095200.1	1922	1947	light responsive element
Potri.018G095200.1	480	505	light responsive element
Potri.018G095200.1	752	777	light responsive element
Potri.018G095200.1	813	838	light responsive element
Potri.018G095200.1	1024	1049	light responsive element
Potri.018G095200.1	1453	1478	light responsive element
Potri.018G095200.1	621	646	MeJA-responsiveness
Potri.018G095200.1	1670	1695	MeJA-responsiveness
Potri.018G095200.1	228	253	light responsive element
Potri.018G095200.1	75	100	light responsive element
Potri.018G095200.1	1798	1823	light responsive element
Potri.018G095200.1	509	534	anaerobic induction
Potri.018G095200.1	1080	1105	anaerobic induction
Potri.018G095200.1	1521	1546	drought-inducibility
Potri.018G095200.1	228	253	abscisic acid responsiveness
Potri.019G125000.1	660	685	zein metabolism regulation
Potri.019G125000.1	1012	1037	zein metabolism regulation
Potri.019G125000.1	377	402	light responsive element
Potri.019G125000.1	662	687	MeJA-responsiveness
Potri.019G125000.1	1762	1787	MeJA-responsiveness
Potri.019G125000.1	1782	1807	MeJA-responsiveness
Potri.019G125000.1	242	267	light responsive element
Potri.019G125000.1	873	898	gibberellin-responsive element
Potri.019G125000.1	45	70	light responsive element
Potri.019G125000.1	398	423	light responsive element
Potri.019G125000.1	614	639	light responsive element
Potri.019G125000.1	1343	1368	light responsive element
Potri.019G125000.1	1347	1372	light responsive element
Potri.019G125000.1	1654	1679	light responsive element
Potri.019G125000.1	1292	1317	defense and stress responsiveness
Potri.019G125000.1	1776	1801	defense and stress responsiveness
Potri.019G125000.1	154	179	light responsive element
Potri.019G125000.1	1893	1918	low-temperature responsiveness
Potri.019G125000.1	662	687	MeJA-responsiveness
Potri.019G125000.1	1762	1787	MeJA-responsiveness
Potri.019G125000.1	1782	1807	MeJA-responsiveness
Potri.019G125000.1	644	669	light responsive element
Potri.019G125000.1	1201	1226	light responsive element
Potri.019G125000.1	1485	1510	light responsive element
Potri.019G125000.1	1767	1792	gibberellin-responsive element
Potri.019G125000.1	493	518	abscisic acid responsiveness
Potri.019G125000.1	664	689	abscisic acid responsiveness
Potri.019G125000.1	832	857	abscisic acid responsiveness
Potri.019G125000.1	834	859	abscisic acid responsiveness
Potri.019G125000.1	1004	1029	abscisic acid responsiveness
Potri.019G125000.1	1101	1126	abscisic acid responsiveness
Potri.019G125000.1	1764	1789	abscisic acid responsiveness
Potri.019G125000.1	1784	1809	abscisic acid responsiveness
Potri.019G125000.1	1086	1111	anaerobic induction
Potri.019G125000.1	57	82	light responsive element
Potri.019G125000.1	1479	1504	light responsive element
Potri.019G125000.1	799	824	drought-inducibility
Potri.019G125000.1	492	517	light responsive element
Potri.019G125000.1	834	859	light responsive element
Potri.019G125000.1	1003	1028	light responsive element
Potri.019G125000.1	1100	1125	light responsive element
Potri.019G125000.1	663	688	light responsive element
Potri.019G125000.1	831	856	light responsive element
Potri.019G125000.1	1763	1788	light responsive element
Potri.019G125000.1	1783	1808	light responsive element
Potri.T112300.1	1595	1620	gibberellin-responsive element
Potri.T112300.1	1412	1437	light responsive element
Potri.T112300.1	43	68	light responsive element
Potri.T112300.1	997	1022	light responsive element
Potri.T112300.1	1960	1985	light responsive element
Potri.T112300.1	680	705	MeJA-responsiveness
Potri.T112300.1	724	749	MeJA-responsiveness
Potri.T112300.1	500	525	zein metabolism regulation
Potri.T112300.1	803	828	light responsive element
Potri.T112300.1	336	361	light responsive element
Potri.T112300.1	680	705	MeJA-responsiveness
Potri.T112300.1	724	749	MeJA-responsiveness
Potri.T112300.1	443	468	abscisic acid responsiveness
Potri.T112300.1	494	519	abscisic acid responsiveness
Potri.T112300.1	1367	1392	abscisic acid responsiveness
Potri.T112300.1	1368	1393	abscisic acid responsiveness
Potri.T112300.1	1827	1852	abscisic acid responsiveness
Potri.T112300.1	1971	1996	abscisic acid responsiveness
Potri.T112300.1	1005	1030	light responsive element
Potri.T112300.1	1367	1392	light responsive element
Potri.T112300.1	1826	1851	light responsive element
Potri.T112300.1	1971	1996	light responsive element
Potri.T112300.1	442	467	light responsive element
Potri.T112300.1	493	518	light responsive element
Potri.T112300.1	1367	1392	light responsive element
Potri.T112300.1	730	755	meristem expression
Potri.T112300.1	1492	1517	light responsive element
Potri.T112300.1	358	383	anaerobic induction
Potri.T112300.1	792	817	anaerobic induction
Potri.T112300.1	1357	1382	anaerobic induction
Potri.T112300.1	738	763	light responsive element
Potri.T112300.1	1782	1807	light responsive element
Potri.T112300.1	1614	1639	light responsive element
Potri.T112300.1	1615	1640	light responsive element
Potri.T112300.1	1703	1728	light responsive element
Potri.T112300.1	1940	1965	light responsive element
Potri.T112400.1	1194	1219	light responsive element
Potri.T112400.1	1176	1201	defense and stress responsiveness
Potri.T112400.1	996	1021	MeJA-responsiveness
Potri.T112400.1	610	635	light responsive element
Potri.T112400.1	1751	1776	light responsive element
Potri.T112400.1	1890	1915	light responsive element
Potri.T112400.1	882	907	light responsive element
Potri.T112400.1	996	1021	MeJA-responsiveness
Potri.T112400.1	1112	1137	anoxic specific inducibility
Potri.T112400.1	1337	1362	light responsive element
Potri.T112400.1	1285	1310	light responsive element
Potri.T112400.1	1336	1361	light responsive element
Potri.T112400.1	1337	1362	light responsive element
Potri.T112400.1	1335	1360	light responsive element
Potri.T112400.1	668	693	light responsive element
Potri.T112400.1	1918	1943	light responsive element
Potri.T112400.1	464	489	light responsive element
Potri.T112400.1	589	614	light responsive element
Potri.T112400.1	1176	1201	light responsive element
Potri.T112400.1	1506	1531	anaerobic induction
Potri.T112400.1	1848	1873	anaerobic induction
Potri.T112400.1	1286	1311	abscisic acid responsiveness
Potri.T112400.1	1335	1360	abscisic acid responsiveness
Potri.T112400.1	1337	1362	abscisic acid responsiveness
Potri.T112400.1	1338	1363	abscisic acid responsiveness
Potri.T112400.1	1129	1154	light responsive element
Potri.T112400.1	1169	1194	cell cycle regulation
Potri.T112400.1	1927	1952	auxin responsiveness
Potri.T180200.1	157	182	low-temperature responsiveness
Potri.T180200.1	478	503	low-temperature responsiveness
Potri.T180200.1	1235	1260	low-temperature responsiveness
Potri.T180200.1	1451	1476	MeJA-responsiveness
Potri.T180200.1	1680	1705	light responsive element
Potri.T180200.1	1451	1476	MeJA-responsiveness
Potri.T180200.1	1143	1168	light responsive element
Potri.T180200.1	823	848	light responsive element
Potri.T180200.1	869	894	light responsive element
Potri.T180200.1	1627	1652	light responsive element
Potri.T180200.1	1785	1810	light responsive element
Potri.T180200.1	1681	1706	light responsive element
Potri.T180200.1	142	167	light responsive element
Potri.T180200.1	204	229	light responsive element
Potri.T180200.1	696	721	light responsive element
Potri.T180200.1	183	208	meristem expression
Potri.T180200.1	545	570	anaerobic induction
Potri.T180200.1	1424	1449	light responsive element
Potri.T180200.1	133	158	light responsive element
Potri.T180200.1	1566	1591	light responsive element
Potri.T180200.1	1296	1321	light responsive element
Potri.T180200.1	1109	1134	light responsive element
Potri.T180200.1	1264	1289	auxin responsiveness
Potri.T180200.1	1953	1978	circadian control
Potri.T180200.1	1296	1321	abscisic acid responsiveness
